# Supplementary material for: Circumstances that promote social connectedness in older adults participating in intergenerational programmes with adolescents: a realist review
Source: PubMed Central journal article supplement — BMJ Open. 2023 Oct 17;13(10):e069765. doi: 10.1136/bmjopen-2022-069765 (PMC10583064; doi:10.1136/bmjopen-2022-069765), 2023-10-17
Supplement: bmjopen-2022-069765.draft_revisions.pdf [file bmjopen-2022-069765.draft_revisions.pdf]

# BMJ Open

BMJ Open is committed to open peer review. As part of this commitment we make the peer review history of every article we publish publicly available.

When an article is published we post the peer reviewers' comments and the authors' responses online. We also post the versions of the paper that were used during peer review. These are the versions that the peer review comments apply to.

The versions of the paper that follow are the versions that were submitted during the peer review process. They are not the versions of record or the final published versions. They should not be cited or distributed as the published version of this manuscript.

BMJ Open is an open access journal and the full, final, typeset and author-corrected version of record of the manuscript is available on our site with no access controls, subscription charges or pay-per-view fees (<http://bmjopen.bmj.com>).

If you have any questions on BMJ Open's open peer review process please email [info.bmjopen@bmj.com](mailto:info.bmjopen@bmj.com)

# BMJ Open

## **Circumstances that promote social connectedness in older adults participating in intergenerational programs with adolescents: a realist review**

|                               |                                                                                                                                                                                                                                        |
|-------------------------------|----------------------------------------------------------------------------------------------------------------------------------------------------------------------------------------------------------------------------------------|
| Journal:                      | <i>BMJ Open</i>                                                                                                                                                                                                                        |
| Manuscript ID                 | bmjopen-2022-069765                                                                                                                                                                                                                    |
| Article Type:                 | Original research                                                                                                                                                                                                                      |
| Date Submitted by the Author: | 04-Nov-2022                                                                                                                                                                                                                            |
| Complete List of Authors:     | Simionato, J; La Trobe University, Department of Public Health<br>Vally, H; Deakin University, School of Health and Social Development<br>Archibald, Daryll; La Trobe University, Department of Public Health;<br>University of Dundee |
| Keywords:                     | PUBLIC HEALTH, SOCIAL MEDICINE, PREVENTIVE MEDICINE                                                                                                                                                                                    |
|                               |                                                                                                                                                                                                                                        |

SCHOLARONE™  
Manuscripts

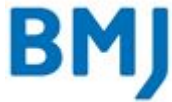

I, the Submitting Author has the right to grant and does grant on behalf of all authors of the Work (as defined in the below author licence), an exclusive licence and/or a non-exclusive licence for contributions from authors who are: i) UK Crown employees; ii) where BMJ has agreed a CC-BY licence shall apply, and/or iii) in accordance with the terms applicable for US Federal Government officers or employees acting as part of their official duties; on a worldwide, perpetual, irrevocable, royalty-free basis to BMJ Publishing Group Ltd ("BMJ") its licensees and where the relevant Journal is co-owned by BMJ to the co-owners of the Journal, to publish the Work in this journal and any other BMJ products and to exploit all rights, as set out in our [licence](#).

The Submitting Author accepts and understands that any supply made under these terms is made by BMJ to the Submitting Author unless you are acting as an employee on behalf of your employer or a postgraduate student of an affiliated institution which is paying any applicable article publishing charge ("APC") for Open Access articles. Where the Submitting Author wishes to make the Work available on an Open Access basis (and intends to pay the relevant APC), the terms of reuse of such Open Access shall be governed by a Creative Commons licence – details of these licences and which [Creative Commons](#) licence will apply to this Work are set out in our licence referred to above.

Other than as permitted in any relevant BMJ Author's Self Archiving Policies, I confirm this Work has not been accepted for publication elsewhere, is not being considered for publication elsewhere and does not duplicate material already published. I confirm all authors consent to publication of this Work and authorise the granting of this licence.

1  
2  
3  
4  
5  
6  
7  
8  
9  
10  
11  
12  
13  
14  
15  
16  
17  
18  
19  
20  
21  
22  
23  
24  
25  
26  
27  
28  
29  
30  
31  
32  
33  
34  
35  
36  
37  
38  
39  
40  
41  
42  
43  
44  
45  
46  
47  
48  
49  
50  
51  
52  
53  
54  
55  
56  
57  
58  
59  
60

## **Circumstances that promote social connectedness in older adults participating in intergenerational programs with adolescents: a realist review**

Authors: Simionato J<sup>1</sup>, Vally H<sup>2</sup> and Archibald D<sup>1,3</sup>

<sup>1</sup> Department of Public Health, La Trobe University, Plenty Road and Kingsbury Drive, VIC 3086 Australia

<sup>2</sup> School of Health and Social Development, Deakin University, 221 Burwood Highway, Burwood, VIC 3125, Australia

<sup>3</sup> School of Health Sciences, University of Dundee, 11 Airlie Place, Dundee DD1 4HJ, Dundee, United Kingdom

Key words: Intergenerational Program, Older adults, Adolescents, Social Connectedness, Realist Review

Corresponding author:

Dr Daryll Archibald, School of Health Sciences, University of Dundee, 11 Airlie Place, Dundee DD1 4HJ. Email: [DArchibald001@dundee.ac.uk](mailto:DArchibald001@dundee.ac.uk)

**Word Count: 5074**

**ABSTRACT**

**Objectives:** Limited social connectedness in older adults is a risk factor for poor physical and mental health. Older adults who are socially isolated, lonely and disconnected have a higher risk of chronic illness, depression and premature death. Current literature suggests that improved social connectedness reduces these risks. Intergenerational programs are an effective way to improve health outcomes. Despite this, there is yet to be a review using realist review methods that seeks to identify the circumstances that promote social connectedness in older adults participating in intergenerational programs with adolescents.

**Method:** A realist review methodology was chosen to account for the complexity of intergenerational interventions. Nine studies were included. In line with realist review methodology, iterative data extraction and analysis was conducted to identify the specific contexts, mechanisms, and outcomes of the programs. Specific circumstances were identified to develop theories relating to improved social connectedness in older adults.

**Results:** The nine included studies were set in different contexts, including community organisations, schools and aged care facilities and used an array of interventions including reminiscence therapy, craft, or space for conversation. Despite study heterogeneity, the parallels in psychosocial development between older adults and adolescents were shown to be a likely driver for improved social health outcomes. Programs most likely to improve social health outcomes were those that acknowledged psychosocial development, were delivered in community settings, leveraged pedagogic frameworks, used trained facilitators, and supported participants to build relationships through shared purpose.

**Conclusions:** This review contributes a logic model to support the design and development of intergenerational programs involving adolescents to improve social connectedness in older adults. Future research to test the logic model in practice is needed.

### Strengths and limitations of this study

- This is the first realist review to investigate the circumstances that promote social connectedness in older adults participating in intergenerational programs with adolescents
- Comprehensive searches were undertaken with the aim of identifying all relevant published and grey literature.
- A logic model has been developed to support the design and development of intergenerational programs involving adolescents to improve social connectedness in older adults.
- The evidence base is limited for participants living in rural locations and participants with cognitive impairment.

## INTRODUCTION

Limited social connectedness is a risk for poor health and wellbeing in older adults[1-4]. Older adults (over 65 years) are at particular risk of social disconnectedness and loneliness because of frailty and chronic illness, which may limit opportunities for social interaction[5, 6]. In addition, modern society has altered family structures, geographically dispersed the family unit and made maintaining intergenerational and family connections challenging, adding to social health vulnerability in older people[7-10]. Many older adults move into residential aged care facilities, away from familiar community supports, often following a medical incident[11].

Social disconnectedness, loneliness and social isolation can be as damaging to health and wellbeing as smoking and obesity[4, 7, 12, 13]. Poor health due to acute or chronic conditions, cognitive decline or frailty influences an older person's ability to carry out personal, domestic, social or community activities and in turn increases their risk of social disconnectedness[1, 14, 15]. Older adults who remain socially connected without episodes of isolation or loneliness have lower rates of mental and chronic illnesses such as depression and cardiovascular disease[7, 11, 12, 16, 17].

Support for older adults, particularly post retirement or when faced with cognitive or physical impairment, is essential in maintaining individual social identity and social connectedness with family, friends and the community[4, 12]. The World Health Organization has challenged communities to provide age friendly communities. This global movement is demonstrating the power of building social capital and engaging older adults through community programs and social and environmental infrastructure to support community access[18]. Intergenerational programs have emerged as a popular and beneficial option for bolstering community connections and improving the health and wellbeing of older people[12, 19, 20].

Intergenerational programs are programs where two generations experience mutual benefit through shared experiences[19, 21] and are a known mechanism for improving social connectedness[19] and providing a sense of inclusion and empowerment in older adults[22]. Intergenerational programs bring together and benefit both generational groups[22-26] and have been adopted in a variety of contexts and age groups. These include the use of pedagogic frameworks with school age children[22], service learning interventions with university students[27, 28] and in familial groups[25].

Intergenerational programs involving older adults and preschool or young children have been widely reported[15, 21, 22, 28], however those that pair adolescents (individuals aged 13-19) and older adults are less known[29]. Pairing older adults and adolescents through intergenerational

1 programs is modelled on Erikson's theory of psychosocial development[30, 31]. According to  
2 Erikson's theory, adolescents and older adults are both facing a period in their psychosocial  
3 development focused on identity. Adolescents, emerging from childhood are looking to their  
4 peers to 'fit in' and to understand society through the eyes of others. Older adults, particularly the  
5 recently retired, are trying to maintain their identity, with a desire to contribute to society[32].  
6 This motivation to pass on wisdom to the next generation is termed generativity[30, 31] and is  
7 important for the wellbeing of older adults as well as broader social health[4]. Intergenerational  
8 interactions through family or a formal program support the development of generativity[30, 31,  
9 33]. The likely benefits of this generational pairing in an intergenerational program context are  
10 yet to be reviewed in depth.

11 This realist review aims to identify the circumstances in which social connectedness is optimised  
12 for older adults when taking part in intergenerational interventions with adolescents. The  
13 question underpinning the review is – which circumstances promote social connectedness in older  
14 adults participating in intergenerational programs with adolescents.  
15  
16  
17  
18  
19  
20  
21  
22  
23  
24  
25  
26  
27  
28  
29  
30  
31  
32  
33  
34  
35  
36  
37  
38  
39  
40  
41  
42  
43  
44  
45  
46  
47  
48  
49  
50  
51  
52  
53  
54  
55  
56  
57  
58  
59  
60



## METHODOLOGY

A realist review methodology was undertaken in line with the RAMESES publication standards[34]. Realist review provides a framework for understanding complex interventions and *why* they deliver the outcomes they do[35]. A protocol for the review was developed following the stages outlined by Pawson[36] and included (1) locating existing theories, (2) searching for evidence, (3) selecting articles, (4) extracting and organising data, and (5) synthesising the evidence and drawing conclusions.

A realist review is an approach used for systematic evidence review that utilises secondary data to understand the reasons why a particular set of contexts, mechanisms and outcomes lead to a particular result. Contexts are the circumstances in which the program is delivered and how these interact with the program mechanisms. Mechanisms are the program resources, and the way participants interact with them. The result of context and mechanism interaction is what drives a particular outcome to occur. Realist review utilises generative understanding to iteratively build *a priori* theories that are then tested and refined. The *a priori* theories are initially drawn from available literature and through stakeholder consultation. Realist review uses the lenses of context, mechanism and outcome to appraise, synthesise and then test the recommendations that are constructed through the analysis process[34, 35].

### **Step one: a priori theory development**

The development of *a priori* theories was an iterative, two-part process[34, 35, 37] and was undertaken by JS and DA. This included stakeholder engagement and a detailed search of the peer-reviewed and grey literature on the subject, followed by *a priori* theory development that were tested against the literature and information from initial stakeholder meetings. Search terms and strategy can be found in Box 1.

#### *Patient and public involvement*

No patients or members of the public were involved in this research.

#### *Stakeholder engagement*

The idea for this review came from a collaboration involving the authors, a municipality in regional Victoria, Australia, and a high school located within that municipality. Originally, the collaboration was centred on the development and evaluation of a pilot intergenerational digital literacy program involving adolescent school pupils and older community-dwelling individuals. However, during the initial stages of designing the program, the authors identified there was an absence of review-level evidence regarding intergenerational programs involving adolescents and older people. A decision was made to undertake a realist review on this topic. Municipal and high school

collaborator stakeholders were involved in the process of generating *a priori* theories by contributing information on the need and opportunity for intergenerational programs in the school environment.

### Box 1: Search terms and search strategy

A literature search was undertaken between May and July 2019 by JS and DA. An updated search was completed in June 2020.

#### Databases

MEDLINE, PsychINFO, CINAHL were searched using English language limitation. Google Scholar was used to supplement the search using a simplified search terms list.

Grey literature was accessed via websites, including relevant government and non-government websites including Australian Federal and State Government agencies, Not-for profits and the World Health Organization. Reference list searching was also used.

#### Search terms

Search terms included; (Aged OR "older adult" OR senior OR elder\* OR geriatric OR "old\* person\*") AND ("intergenerational relation\*" OR "intergenerational program\*" OR "intergenerational activit\*" OR "intergenerational practice" OR "intergenerational learning" OR "intergenerational service learning" OR "intergenerational relations" OR intergenerational) AND ("social connect\*" OR "social isolation" OR "social interact\*" OR loneliness OR "social participation") AND ("adolescent")

#### Study selection

The inclusion and exclusion criteria (Table 1) were applied by JS and DA to ensure the included studies met the aim of the review. Included participants were aged 65 and over (older adults) and between 13 and 19 years (adolescents) as these age ranges are agreed as defining older adults and adolescents[30].

**Table 1: Inclusion and Exclusion criteria**

| Included                                                                                               | Excluded                                                                                               |
|--------------------------------------------------------------------------------------------------------|--------------------------------------------------------------------------------------------------------|
| Study reporting on intergenerational programs. Study can be quantitative, qualitative or mixed-methods | Reported on non-intergenerational programs                                                             |
| Participants from non-familial generations                                                             | Studies involving the study of grandparents / grandparenting or family intergenerational relationships |
| Aged 13-19                                                                                             | Aged <13                                                                                               |
| Aged 65 and above                                                                                      | Aged 20-64                                                                                             |
| Published 2000-2020                                                                                    | Published before 2000                                                                                  |
| Published in English                                                                                   | Not published in English                                                                               |

*a priori* theory development

JS and DA developed six *a priori* theories and tested these against the literature before conducting a final literature search to check for new evidence.

### **Step two: data extraction and evidence synthesis**

In step two, data extraction and evidence synthesis from the nine included studies was undertaken.

#### *Data extraction*

A bespoke data extraction form (supplementary file 1) was developed by DA and JS and included the *a priori* theories identified in step one. The data extraction form covered several domains including bibliographic information, aims and methods, participant details, intervention details, results and findings. The form also provided for *a priori* theory testing including extraction of evidence that proved, disproved or refined the theory. The data extraction process was completed by JS and DA.

#### *Quality appraisal*

A realist review method supports the inclusion of qualitative, quantitative and mixed methods studies[34, 38]. To understand the quality of included articles, we consulted critical appraisal

1 literature[39, 40]. A bespoke set of eight quality assessment criteria were developed focusing on  
2 the methodological quality and reporting quality of the included studies (supplementary file 2).  
3  
4

### 5 *Synthesis*

6

7  
8 All authors were involved in the evidence synthesis process using extracted data to illuminate the  
9 contexts, mechanisms and outcomes that underpinned reviewed programs. The process then  
10 involved identifying evidence combinations and testing them against the *a priori* theories to  
11 develop context mechanism outcome configurations (CMOC). The development of the CMOC  
12 presented a variety of emergent issues that were continually tested against the *a priori* theories  
13 and the known evidence. This process identified new theories and the CMOC were further  
14 refined. Ethics approval was not required for this study.  
15  
16  
17  
18  
19  
20  
21  
22  
23  
24  
25  
26  
27  
28  
29  
30  
31  
32  
33  
34  
35  
36  
37  
38  
39  
40  
41  
42  
43  
44  
45  
46  
47  
48  
49  
50  
51  
52  
53  
54  
55  
56  
57  
58  
59  
60

## RESULTS

Data from the included studies were synthesised to generate eight theories relating to characteristics of intergenerational programs likely to optimise social connectedness for older adults. The components of these theories are combined to form context mechanism outcome configurations (CMOC) and a logic model to support answering the question – which circumstances promote social connectedness in older adults participating in intergenerational programs with adolescents? Figure 1 below provides the results of the literature search. Nine studies were included in the review.

**\*Insert here\_Figure 1: Flow Diagram**

Table 2: Included study characteristics

| Included Study                    | Study details                                                                                                                                                                        | Study aim                                                                                                                                    | Sample characteristics                                                                                                                                          | Summary of findings                                                                                                                        | Use of a facilitator | Pre-program training   | Data collection and analysis                                                                                                                                                          |
|-----------------------------------|--------------------------------------------------------------------------------------------------------------------------------------------------------------------------------------|----------------------------------------------------------------------------------------------------------------------------------------------|-----------------------------------------------------------------------------------------------------------------------------------------------------------------|--------------------------------------------------------------------------------------------------------------------------------------------|----------------------|------------------------|---------------------------------------------------------------------------------------------------------------------------------------------------------------------------------------|
| <b>de Souza[41]</b>               | Qualitative; School (Brazil); Older adult participants shared life experiences with students in a classroom environment.                                                             | Intergenerational program evaluation from participant viewpoint.                                                                             | 84 randomly selected students;<br>Age 13-19 years;<br>26 older people; Age 60 years +; Male and female groups.                                                  | The intergenerational activity based on reminiscence improved social interaction and community wellbeing for older adults.                 | Unclear              | No                     | Focus group interviews followed by thematic analysis                                                                                                                                  |
| <b>Kessler and Staudinger[33]</b> | Quantitative; Laboratory (Germany); Interaction between an Older Person and Younger Person, Two Older People or Two Younger people addressing a "life problem" or a "media problem". | To understand if intergenerational interactions have the potential to facilitate psychological functioning in both adolescent and old age.   | Older women aged 70-74 n=90 and girls aged 14-15 n=90                                                                                                           | Improved cognitive performance, reduced negative age-related stereotypes and triggered generative behaviours.                              | No                   | No                     | Data collected by a series of survey, psychometric and cognitive tests. Analysis completed using planned comparisons                                                                  |
| <b>Hernandez and Gonzalez[42]</b> | Quantitative; Local council social centre (Spain); Weekly recreational activities (talks, excursions, cultural events). 32 interactive session "movement program".                   | To investigate the effect of an intergenerational program on stereotyped attitudes towards elderly people and the wellbeing of older adults. | 101 elderly people; across two groups, age M= 74 (SD=7.7) and M=75 (SD= 5.21); 179 university students; Age M=19 (SD= 0.93); Both male and female participants. | Improved outcomes in depression measures in older adults who participated in an intergenerational exercise group.                          | Yes                  | Yes – adolescents only | Pre and post sessions that included questionnaires and geriatric depression scale. Analysis via repeated measure analysis of variance (ANOVA)                                         |
| <b>Wilson, Cordier[43]</b>        | Qualitative; Men's shed (Australia); 10 week intergenerational mentoring program over with older male mentors offering support to younger at risk males                              | To explore the experiences and perceptions of mentors involved in an occupation skill focussed program with teenage boys.                    | 9 teenage boys; Age ~15 years; 6 older male mentors; Age 60-75; a project facilitator and a youth worker. All participants were male.                           | Intergenerational programs involving older adults with a strong sense of generativity were shown to be a valuable resource to communities. | Yes                  | Yes- both groups       | Pre and post Individual interviews and focus groups with both groups however only reported on data from older adult participants using constant comparative method of grounded theory |

|                               |                                                                                                                                                                                     |                                                                                                                                                                                                 |                                                                                                                                                                                       |                                                                                                                                                      |     |                        |                                                                                                                                                                                                                                                      |
|-------------------------------|-------------------------------------------------------------------------------------------------------------------------------------------------------------------------------------|-------------------------------------------------------------------------------------------------------------------------------------------------------------------------------------------------|---------------------------------------------------------------------------------------------------------------------------------------------------------------------------------------|------------------------------------------------------------------------------------------------------------------------------------------------------|-----|------------------------|------------------------------------------------------------------------------------------------------------------------------------------------------------------------------------------------------------------------------------------------------|
| <b>Biggs and Knox[44]</b>     | Qualitative; Residential care/ assisted living (USA (Texas)); Girl scout meetings held in assisted living facility                                                                  | To identify impact of an intergenerational program for girl scouts (young people) and residents (older people) on quality of life, social interaction and personal attitudes.                   | Focus groups comprised of parents = 8, residents = 5, staff = 10, children (scouts and daisies) 5-12 years = 9; Content essay participants ages 6-16: n= 18; All participants female. | Intergenerational programs using social workers and community volunteers strengthened intergenerational relationships.                               | Yes | No                     | Focus group interviews with both groups and submitted essays from the younger participants followed by hematic analysis                                                                                                                              |
| <b>Knight, Skouteris[31]</b>  | Mixed Methods; Residential aged care setting (Australia); Development of a life story review book by adolescent students partnered with an older adult.                             | To pilot and test the feasibility of an intergenerational program "My Life Story".                                                                                                              | Adolescents n= 24; Age M= 14.56 (SD=0.5); Older adults n= 12; Age M=90.58 (SD=3.59); Gender of participants not stated                                                                | Improved social connectedness and community engagement resulted from an intergenerational program using reminiscence.                                | Yes | Yes- both groups       | Qualitative data collected (post) using semi-structured interviews and quantitative data collected (pre and post) using a series of items followed by thematic analysis and paired t-tests.                                                          |
| <b>Ostensen, Gjevjon[11]</b>  | Qualitative; Residential care facility or private home (Norway) Sessions over a 12-month period with volunteer adolescents supporting older adults to learn use of a tablet device. | To explore a new model of care that supports older people to participate by introducing technology and mobilising volunteer services.                                                           | Older adults n= 15 (5 withdrew due to illness, death and hospitalisation); Adolescents n=not stated; Age 54-94 years; Both male and female participants.                              | Reduction in anxiety and increase in social activity for older adults followed an intergenerational program supporting older adults to use an iPad.  | Yes | Yes- adolescents only  | Individual semi structured interviews repeated over a 12 month period with the older adults only followed by thematic analysis                                                                                                                       |
| <b>Santini, Tombolesi[45]</b> | Qualitative; Residential aged care facility (Italy); Intergenerational activity based meetings with aged care residents, older adult community volunteers and adolescents.          | To understand if creating community space and planning activities where adolescents, older adults, and active older volunteers meet and interact will improve health outcomes for older adults. | 14-year-old students n=25 (18 males and 7 females) and three teachers; 16 older residents; Age M=83; three social workers; 16 older volunteers; Age M=70                              | The intergenerational program improved the wellbeing of institutionalised older adults.                                                              | Yes | Yes- both groups       | Individual and focus groups Interviews with students; individual interview with older adults; focus groups with volunteers before, during and after the intervention followed by content analysis                                                    |
| <b>Wilson, Cordier[29]</b>    | Mixed methods; Men's shed (Australia); Intergenerational mentoring program with older adults and young adults with intellectual disability.                                         | To examine the feasibility of a novel Men's Shed intergenerational mentoring intervention for young adults with intellectual disability.                                                        | 5 mentees (average age 16); Older adult mentors n=12; Age M=69.5 (SD=8.53); All participants were male.                                                                               | Intergenerational mentoring interventions for youth with intellectual disability at community Men's Sheds were shown to be feasible and appropriate. | Yes | Yes- older adults only | Quantitative data via pre-and post-intervention outcome measures and descriptive data of mentees' functional skills. Qualitative data collected at end of project via individual interviews with mentees and mentors. Used realist evaluation method |

The characteristics of the included studies are provided in Table 2. In phase two of the review, data was analysed to 1) confirm the degree to which the *a priori* theories identified in phase one (see Table 3) were supported and 2) generate the contexts, mechanisms and outcomes from the included interventions.

### Quality Assessment

In line with recommendations for realist reviews[36] no studies were excluded following quality assessment, rather each study was ultimately assessed for its contribution to theory development and context mechanism outcome configurations. The quality assessment of each included study concluded with an overall estimate of how valuable the study was to the review (Low, Medium or High), a criterion based on Question 10 of the Critical Appraisal Skills Programme qualitative quality assessment tool[46]. The assessment concluded that majority of studies (7/9) were found to be of high value to the review[11, 29, 31, 33, 41, 43, 45]. These studies were rated as highly valuable due to the age range of participants fitting directly with the aims of this review and because they reported on intergenerational programs in detail and provided ample evidence to support their findings, facilitating the analytical process for this review. The Biggs et al.[47] and Hernandez and Gomez[42] studies were rated as being of medium value to the review. Biggs et al.[47] was assessed as lacking on detail with regard to the reporting of the findings, whereas Hernandez and Gomez[42] had limited age group relevance to the review aims as the younger age group had an average age of 19.

**Table 3: *a priori* theories identified after step one**

|                                                                                                                                                                                                             |
|-------------------------------------------------------------------------------------------------------------------------------------------------------------------------------------------------------------|
| Intergenerational programs involving adolescents and older adults improve social connectedness in the older adult group.                                                                                    |
| Intergenerational programs conducted in educational contexts result in positive outcomes in social connectedness for one/both groups.                                                                       |
| Because they are at a similar point in psychosocial development, adolescents and older people are likely to be mutual beneficiaries of intergenerational programs.                                          |
| Intergenerational programs help support meaningful connections for older people who may be socially disconnected within the community, with individuals outside of their normal age and social demographic. |
| Greater generativity is formed through participation in intergenerational programs.                                                                                                                         |
| Intergenerational programs conducted in educational contexts build community connections between generations and across structural community assets like schools.                                           |

When coupled with the *a priori* theories generated from phase one, context mechanism outcome configurations (CMOC) were developed. The CMOC are eight circumstances deemed



optimal for the delivery of intergenerational programs involving older adults and adolescents and are hypothesised to improve outcomes in social connectedness. These are summarised in Table 4 below.

**Table 4: Summary of Context Mechanism Outcome Configurations**

| CMOC label and summary-level description                                                                                                                                                                                                                                                                                                                                                                                                                                                                                                                                                                                              | References of included studies |
|---------------------------------------------------------------------------------------------------------------------------------------------------------------------------------------------------------------------------------------------------------------------------------------------------------------------------------------------------------------------------------------------------------------------------------------------------------------------------------------------------------------------------------------------------------------------------------------------------------------------------------------|--------------------------------|
| <p><b>CMOC 1 Understand the participants psychosocial development phase and attitudes towards each other to foster generativity</b></p> <p>Adolescents and older adults are at a similar crossroads in the formation and maintenance of their identity[30] (context). Understanding the developmental phase and held attitudes of the participants (context) supports the design of program training activities (mechanism) and ‘ice breakers’ (mechanisms) that foster reciprocity (mechanism) and are more likely to trigger generativity (outcome) between the generational groups and improve social connectedness (outcome).</p> | All included studies           |
| <p><b>CMOC 2 Use a pedagogic framework to trigger generativity, intercommunity connections and deliver social health outcomes</b></p> <p>Pedagogic frameworks (context) motivate the adolescent to participate in intergenerational programs and achieve a result[31, 41, 44]. Similarly, the older adult is motivated to transfer skills and wisdom and provide support to the adolescent so as they can achieve their goal (mechanism). As a result, social connectedness and attitudes (outcomes) towards the other generational group improve.</p>                                                                                | All included studies           |
| <p><b>CMOC 3 Design the program to be frequent and have a clear structure to support participation and improved social connectedness</b></p> <p>Pedagogic frameworks (context) provide structure. Programs that are co-designed and scheduled frequently allow relationships to form through shared goals and activities (mechanisms). Frequent and carefully structured programs allow for improved social connectedness, and sustainable health and community benefits (outcomes).</p>                                                                                                                                              | All included studies           |
| <p><b>CMOC 4 Conduct the program in community settings to support social health outcomes and build social capital</b></p> <p>Community settings including educational institutions, care homes or existing community groups provide a foundation for engagement (context) when delivering intergenerational programs. Programs that showed a strong connection to the community through their facilitators (mechanism) or the physical environment (mechanism) showed improved sustainability and generalisability for the participants and the broader social capital of the community (outcome).</p>                                | [11, 29, 31, 41-43, 45]        |
| <p><b>CMOC 5 Deliver pre-program training and support participants to ‘break the ice’</b></p> <p>Utilising existing community settings and knowledge of psychosocial development, (contexts), pre-program training (mechanism) and activities that support participants to connect on a more informal level (mechanism) work together to bridge gaps between the generations (outcome).</p>                                                                                                                                                                                                                                           | [11, 29, 31, 41-43, 45]        |
| <p><b>CMOC 6 Identify shared goals between program participants to build reciprocity and support program engagement</b></p> <p>Through use of pedagogic frameworks and existing community links (contexts), the identification of shared goals builds reciprocity (mechanism) between the participants and in turn may trigger benefits including a greater sense of generativity (outcome), improved wellbeing (outcome) and social connectedness (outcome).</p>                                                                                                                                                                     | [11, 29, 31, 41-43, 45]        |
| <p><b>CMOC 7 Include a trained facilitator to promote program participation</b></p> <p>In a variety of contexts, the inclusion of a program facilitator (mechanism) may support improved social connectedness (outcome). The other key function of a facilitator is to ensure that the</p>                                                                                                                                                                                                                                                                                                                                            | [29, 31, 41-43, 45]            |

|                                                                                                                                                                                                                                                                                                                                                                                                                                                                 |                                    |
|-----------------------------------------------------------------------------------------------------------------------------------------------------------------------------------------------------------------------------------------------------------------------------------------------------------------------------------------------------------------------------------------------------------------------------------------------------------------|------------------------------------|
| <p>participants have had the opportunity to 'break the ice' (mechanism) through pre-program training and informal opportunities such as morning tea times.</p>                                                                                                                                                                                                                                                                                                  |                                    |
| <p><b>CMOC 8 Plan inclusive activities that trigger generativity and improve physical, cognitive, psychological and social outcomes</b></p> <p>When programs use existing community connections, include relationship-based activities with a shared goal (mechanisms) and are grounded in a pedagogic framework (contexts), there is improvement in health and social wellbeing (outcome) and a sense of generativity for the older adult group (outcome).</p> | <p>[11, 29, 31, 33, 41-43, 45]</p> |

### **CMOC 1 Understand the participant's psychosocial development phase and attitudes towards each other to foster generativity and connection**

In the included studies, pre-program psychometric measurement[29, 31, 33, 42], focus groups or interviews[43] and informal gatherings at the beginning of the program[11, 29, 31, 42, 43, 45] were used to understand the demographic and psychosocial characteristics of participants. Psychometric scales that measured attitudes towards ageing, social connectedness, loneliness, generativity and presence of depression were completed pre and post intervention[29, 31, 33, 42]. Pre-program focus groups and interviews were used with both groups[29, 43, 45] to understand participant skills and motivations. This information was used to align participants based on skills and expectations, understand participant relationships with other generations, their attitudes towards ageing and their perceptions of self[45]. Understanding baseline attitudes helped structure programs to promote alternate views of an older person's capability, foster dialogue and enhance learning between generations.

Evidence from the included studies indicates that using pre-program measures to understand participant demographics, including their psychosocial phase and cognitive and physical abilities leads to a more likely match in participant capability and outcomes that improve social connectedness and generativity.

### **CMOC 2 Use a pedagogic framework to trigger generativity, intercommunity connections and deliver social health outcomes**

Pedagogic or service-learning frameworks support participants to learn together in a real-world context[5, 48] and featured in six of the included studies[29, 31, 42-45]. Studies that involved school students were aged between 13-19 years with 15 years the average age across studies[29, 31, 41, 43, 45]. Two studies[31, 45] involved students completing a report or a community presentation, whilst others involved students completing a small woodwork project[29, 43]. These tasks were curriculum linked[31], motivating adolescent participants to complete the task. Older adults reported they felt needed when they were contributing to adolescent's learning and acknowledged the adolescent's contribution to their own learning - *"they can teach us the computer and their new language"*[45]

1  
2 Through the use of a pedagogic framework, results showed improved understanding and respect  
3 for the other generation[43, 44] and older adults gained a sense of pride in being able to pass on  
4 their knowledge and wisdom. These findings provide evidence that in pedagogic contexts, where  
5 reciprocity is formed, it is likely that an improvement in perceived social connectedness and  
6 wellbeing will occur for the older adult.  
7  
8  
9

### 10 **CMOC 3 Design the program to be frequent and have a clear structure to support participation** 11 **and improved social connectedness**

#### 12 *Frequency and duration of sessions*

13  
14 Programs that used a pedagogic framework were usually linked to a school term or semester[29,  
15 41-43, 45]. These programs ranged from six to twelve - week blocks, often repeating over school  
16 terms. Programs that were held weekly[11, 29, 31, 42, 43], fortnightly[41, 45] or bi-monthly[44].  
17 Biggs and Knox[44] reported less frequent sessions were chosen to avoid overwhelming the  
18 participants, compared to other participants who requested more frequent and extended  
19 program sessions so they could spend more time together[29, 41, 43, 45].  
20  
21  
22  
23  
24  
25

#### 26 *Structure of sessions*

27  
28 A clear program structure that included pre-training and time for “breaking the ice”[29, 43] was  
29 reported as beneficial. Typically, studies used the session to engage and introduce participants  
30 or complete training and the following weeks to cover different topics or questions relating to  
31 the aim of the study. In the Ostensen[11] study, older adults raised learning goals that formed  
32 the structure for the week ahead. Overall, evidence suggests that having a structured program  
33 that allows frequent interaction between generational participants is more likely to result in  
34 improved social connectedness and optimised health and wellbeing.  
35  
36  
37  
38  
39  
40

### 41 **CMOC 4 Conduct the program in community settings to support social health outcomes and** 42 **build social capital**

43  
44 Intergenerational programs that occur in community settings provide a platform for building social  
45 capital[4, 9, 26]. Four studies conducted programs in residential care facilities using existing  
46 community connections[11, 31, 44, 45] and two others[29, 42, 43] leveraged local community  
47 programs. Evidence suggested that community-based programs had greater potential in  
48 enhancing social health outcomes for older adults and generating social capital in the broader  
49 community. In the Biggs and Knox[44] study, older adult participants began attending church with  
50 the families of the adolescents, demonstrating connections beyond the program. Similar results  
51 were reported in the de Souza[41] study with older participants reflecting improved mood,  
52 physical wellbeing and a ‘feeling of freedom’ (p. 467), through their opportunities to get out of the  
53 facility and spend time with the adolescents in the community. The location, existing relationships  
54 between community organisations and activities that support participants to observe the other  
55  
56  
57  
58  
59  
60

1 generation playing a role in the community are all positive predictors of a likely improvement in  
2 individual and community social connectedness and wellbeing.  
3  
4

#### 6 **CMOC 5 Deliver pre-program training and support participants to 'break the ice'**

7 Pre-program training was provided in six of the nine included studies. Training was offered to older  
8 adults and the adolescents[29, 31, 45], to older adults only[29] or to adolescents only[11, 42].  
9  
10 Training included program orientation or the opportunity to learn about the other generation.  
11  
12

13 Where training was provided to both the adolescents and older adults, this appeared to foster  
14 social connections. For example, the adolescents shook the hands of the older gentleman at the  
15 beginning and end of each session. This positive social behaviour was felt by the older men to be  
16 respectful and demonstrated social connectedness between the groups[43]. However, in the  
17 Santini[45] study, despite the pre-program introductory material, students reported that they  
18 required support from teachers and older adult volunteers to overcome their emotions when they  
19 met with the older adults for the first time.  
20  
21  
22  
23  
24

25 The Wilson et al[29] program provided training to the older adult mentors only. This training  
26 provided the mentors with disability awareness training via videos. Despite this, it was highlighted  
27 by the older adults that they would have liked to have been more prepared for working with the  
28 adolescents with intellectual disability. Two studies provided training to adolescents only[11, 42]  
29 however did not report on the impact of this training.  
30  
31  
32  
33  
34

35 In studies where no formal pre-program training was provided, results were mixed in relation to  
36 the impact on the program. In the Kessler and Staudinger[33] study, the randomised control trial  
37 methodology required pre-program blinding. In the Biggs and Knox[44] study, the participants  
38 were already involved in an existing Scouts program, so it is assumed that pre-program education  
39 was included in Scout club activities, however, this was not reported by the authors. Parents of  
40 the adolescents in the Biggs and Knox[44] raised concern about their children's reactions to  
41 residents with dementia or if a resident died. There were also reports from the residents and  
42 parents that boundaries and behaviours were not respected by the adolescent participants. These  
43 examples indicate a role for pre-program training to reduce fears and provide education. Where  
44 training or opportunities to interact were sub-optimal or missing, participants highlighted limited  
45 opportunities to 'get to know' each other or feel prepared for the program[29, 41]. If comfort or  
46 confidence in the program is not established, participants may not participate[41] or be reluctant  
47 to participate again[29]. This has broader implications for the sustainability of program outcomes,  
48 particularly those that aim to enhance social capital or galvanise links between community groups.  
49  
50  
51  
52  
53  
54  
55  
56  
57  
58  
59  
60

1  
2  
3  
4  
5  
6  
7  
8  
9  
10  
11  
12  
13  
14  
15  
16  
17  
18  
19  
20  
21  
22  
23  
24  
25  
26  
27  
28  
29  
30  
31  
32  
33  
34  
35

### **CMOC 6 Identify shared goals between program participants to build reciprocity and support program engagement**

By understanding the shared aims of participants, reciprocity is nurtured, participants are more motivated and generativity is triggered. Where participants were involved in program design[42, 45] as well as iteratively throughout the course of the program[11, 44] the program was more person centred, enhanced reciprocal behaviours and improved outcomes.

The Santini[45] study used an action participatory research approach with active older adult volunteers, social workers and teachers and Hernandez and Gonzalez[42] used a co-design approach through adolescent students designing an exercise program for older adults that was delivered with support from lecturers and trained facilitators over 32 sessions. Both generations benefited in these programs, with results indicating a positive shift in age related stereotypes when older adults and adolescents interacted as part of the program.

In programs where there was a shared goal from the outset there was greater improvement in social connectedness[29, 31, 43, 44], reduced markers for depression[42] and stereotypical attitudes towards the older generation[44]. The included studies demonstrate that creating reciprocity drives generative behaviour. Reciprocity and generativity combined leads to improved social connectedness and health and wellbeing outcomes for the individual and the community broadly.

### **CMOC 7 Include a trained facilitator to promote participation**

Facilitation is the act of supporting and enabling a group to meet its objectives (and release its full potential) by fostering conditions that respects and encourages contributions by all members of the group[49]. Facilitation was used in seven of the included studies. The facilitators were trained professionals including teachers[31, 45], university staff[42], fitness instructors[42], health professionals[11, 29, 44], community leaders[44] and youth workers[43]. In the Santini[45] study, active older volunteers also played a facilitation role. Studies that included a facilitator resulted in greater participant interaction and improved program outcomes[29, 43, 45]. In the Wilson et al study, the youth worker that facilitated the program was described as responsible for “*keeping us on track*”[43] and was pivotal in prompting participation between the groups, for example at afternoon tea breaks.

In the study involving girl Scout groups[44], the troop leaders were trained social workers. Whilst their individual experiences were not reported in the findings, the role they played in bringing together individuals connected to existing community settings in girl Scouts, residential aged care and volunteer groups was fundamental in the program longevity and results. In four studies, active adult[29, 43, 45] and adolescent[11] volunteers were recruited from local community volunteer

1 groups and provided additional program facilitation support that likely enhanced positive  
2 outcomes in community engagement and social connectedness.  
3  
4

5  
6 Conversely, in studies where the facilitation was reported as being sub-optimal[29] or absent[41],  
7 the participants and the authors highlighted that greater support from the teachers, researchers  
8 or ‘monitors’ would have enhanced interactions between the generational groups. If facilitation  
9 is absent or lacking, participants may feel frustrated or unsupported, in turn causing participant  
10 disengagement, attrition or an unintended triggering of age-based stereotypes or perceived  
11 loneliness[45]. Trained facilitation supports improved connectedness between participants and  
12 when delivered within community and pedagogic contexts, favourable outcomes in generativity,  
13 social connectedness, and social capital.  
14  
15  
16  
17  
18

19  
20 **CMOC 8 Plan inclusive activities that trigger generativity and improve physical, cognitive,**  
21 **psychosocial, and social outcomes**  
22

23 Included studies reported on programs that provided relationship-based inclusion[31, 41, 44, 45]  
24 and activity-based inclusion[11, 29, 42, 43] opportunities for participants.  
25  
26

27 Relationship-based inclusion:  
28

29 If there is limited opportunity for relationship-based inclusion, adolescents and older adults are  
30 at risk of not experiencing meaningful social connection[31]. Feeling included by peers and the  
31 broader community promotes generativity and in turn improves wellbeing in both age  
32 groups[23, 31]. Several programs[31, 41, 44, 45] used relationship- based inclusion activities  
33 such as reminiscence (sharing old photos or learning about what jobs older people used to do) to  
34 create reciprocity between older adults and adolescents. This was also a mechanism to improve  
35 physical, cognitive, and psychological health, and in turn social connectedness. A marker of  
36 sustained relationships was demonstrated by the adolescents continuing to connect with older  
37 adults after the program[31, 45], including volunteering at a local community organisation with  
38 older people.  
39  
40  
41  
42  
43  
44  
45

46 Activity-based inclusion:  
47

48 Studies that used activity-based inclusion such as exercise programs[42], digital literacy training  
49 with an iPad[11] or woodwork construction[29, 43] also reported improved outcomes in  
50 physical, cognitive, psychological and social domains, including social connectedness. In the  
51 studies set in Men’s Shed’s the young adults were mentored by the older men in occupational  
52 activities, with both groups reporting the activities provided the opportunity to connect, whilst  
53 learning new skills and doing “*something with our hands*”[43]. Young adults with intellectual  
54 disability commented that the Men’s Shed was a unique learning environment - “*they made me*  
55 *feel like part of the group*” and that they “*felt accepted*”[29]. Older adults supported to use a  
56  
57  
58  
59  
60

1 tablet device[11] demonstrated improved social outcomes as they were able to connect with  
2 family in other locations or the outside community through news applications or by tracking  
3 weather. Nurses in the care facility reported a change in social behaviour in the participants  
4 using iPads, taking more initiative, presenting as less anxious and being more socially active. In  
5 the Hernandez and Gonzalez[42] study, the interaction between adolescents and older people  
6 showed statistically significant improvement in depression scores and stereotypical attitudes in  
7 the older adult group. A comparison group led by the adult trainer resulted in a less significant  
8 change in depression scores in the older adults (Group 1 with adolescents=  $p < .001$ ; Group 2 led  
9 by adult trainer =  $p < .008$ ). The control group (who attended the local social centre but did not  
10 interact with the adolescents or participate in exercise sessions) showed a statistically significant  
11 increase in depressive symptoms ( $p < .001$ ). The evidence supports activities that provide the  
12 participating generations with the opportunity to share time, reminisce and develop  
13 relationships are powerful mechanisms for triggering generativity and social connectedness.  
14  
15  
16  
17  
18  
19  
20  
21  
22  
23

### 24 **Logic model**

25 The aim of this review is to identify the circumstances in which social connectedness is optimised  
26 for older adults when taking part in intergenerational interventions with adolescents. The logic  
27 model below represents the relationships between program activities and improved social  
28 connectedness for older adults. As demonstrated through the CMOC, the act of two generations  
29 coming together in familiar community-based contexts with a shared purpose, resulted in  
30 strengthened relationships and community connections. This notion of coming together around a  
31 task, or activity is not dissimilar to sharing a meal or celebrating an occasion; something which is  
32 entwined in human history and behaviour, and indeed punctuates our psychosocial development.  
33 Several participants in the included studies spoke about the benefit of having an opportunity to  
34 'meet and greet' or to share an afternoon tea as part of the program[29, 31, 43-45].  
35  
36  
37  
38  
39  
40  
41  
42

43 This logic model (presented in Figure 2 below) uses a layered cake to represent an optimal  
44 intergenerational program to improve social connectedness in older adults. It is positioned on a  
45 plate (context), with each layer of cake representing the mechanisms that 'glue' the cake together  
46 and result in optimised social connectedness. The program outcomes are represented by the  
47 candles atop the cake, which would not light up without the strong foundations of contexts and  
48 mechanisms. Complex program design and baking a cake both require a variety of conditions and  
49 methods to achieve the desired outcome.  
50  
51  
52  
53  
54  
55  
56  
57  
58  
59  
60



1  
2  
3  
4  
5  
6  
7  
8  
9  
10  
11  
12  
13  
14  
15  
16  
17  
18  
19  
20  
21  
22  
23  
24  
25  
26  
27  
28  
29  
30  
31  
32  
33  
34  
35  
36  
37  
38  
39  
40  
41  
42  
43  
44  
45  
46

**\*Insert here\_Figure 2: Logic model**

For peer review only



## DISCUSSION

Evidence from the included studies reveals how intergenerational programs involving adolescents can address issues of social disconnectedness in older adults. This review identifies how and why intergenerational programs work, for whom and in what circumstances. Broadly, the CMOC cover four main themes - 1) psychosocial and mental health, 2) physical and cognitive health, 3) program design and structure and 4) community engagement and social capital.

### **Psychosocial and mental health**

Providing opportunities for older adults to participate, without being infantilized or inequitably treated is highlighted by the included studies and others as a mechanism for improving reciprocity and generativity[20, 33, 50]. The opportunity to participate in an intergenerational program saw older adults improve their own self-image and stereotypical view of old age and prove to themselves that they still had something to offer the community and the younger generation[41, 42, 45]. Included programs that created opportunities for informal, relationship based activities which triggered generativity, for example promoting conversation between the generational groups, were of greatest benefit to psycho-social health[31, 41, 45].

### **Physical and cognitive health**

The impact of intergenerational programs on broader health outcomes, including cognitive health has been previously reported[15, 51]. The connections between social, cognitive and physical health are well known, particularly in high risk populations like older adults[52-54]. In this review, interventions that promoted the older adult as wise or expert[29, 31, 33, 43, 44] showed improvement in both perceived and measured cognitive performance. Kessler and Staudinger[33] showed improvement in speed of processing and word fluency when older adults were paired with an adolescent and asked to solve a 'life problem'. Qualitative evidence from included studies reported improved physical health in older adults as a result of their involvement in the intergenerational program, including increased energy[29] reduced pain[45] and increased movement[41].

### **Program design and structure**

A range of designs and structures are reported in the intergenerational program literature. Intergenerational programs embedded within pedagogic contexts are supported by existing literature[26, 55, 56] and were featured in many of the included studies. Several studies support the need for in depth, sustainable and accessible intergenerational programs to address social health issues[19, 57]. As highlighted by Cattani et al.,[58] programs that engage adults in the planning and design of the interaction are most effective. This was seen in the Ostensen[11] study and the Wilson et al.,[29] study that highlighted the use of co-design to optimise outcomes.

1  
2  
3  
4  
5  
6  
7  
8  
9  
10  
11  
12  
13  
14  
15  
16  
17  
18  
19  
20  
21  
22  
23  
24  
25  
26  
27  
28  
29  
30  
31  
32  
33  
34  
35  
36  
37  
38  
39  
40  
41  
42  
43  
44  
45  
46  
47  
48  
49  
50  
51  
52  
53  
54  
55  
56  
57  
58  
59  
60

Martins et al.,[59] in a review of intergenerational programs also highlighted the benefit of weekly or fortnightly intergenerational meetings to create bonds between participants.

Several of the included studies highlighted the importance of informal and formal program structures to build a foundation for connection. Several interventions leveraged existing local community connections and pre – program training was shown to support participation[29, 41, 45]. However where complex demographics exist, additional program support may be required[29, 41, 45].

### **Community engagement and social capital**

Programs set in the community that leveraged existing community connections were more likely to promote social connectedness. Individuals already engaged with the community in a volunteer capacity were participants, and in some cases facilitators of the program. Other reviews[21] support the inclusion of volunteers as it is a cost effective way to deliver programs and promote volunteerism- a key element for enhancing social capital. Volunteers were used in the included studies to support program delivery and participant recruitment via community organisations like Rotary or Scouts[11, 29, 43-45]. Adolescents also witnessed volunteer ‘models’ and were interested in volunteerism beyond the program[11, 31, 45].

### **Implications for practice and future research**

This review has provided a logic model that is ready to use by clinicians, program managers and policy makers in the design and implementation of community based intergenerational interventions. This review has implications for targeting physical, social, and mental health in older adults, as well as exploring opportunities for the role of intergenerational programs in adolescent health. Furthermore, the program theory provides a suggested approach for designing programs with a broader system lens. Previous literature has also supported the use of intergenerational programs, in particular those with a social health focus, to counter loneliness[60], influence age related health outcomes[17] and reduce costs associated with increased care needs in older age[11, 61].

The review also provides support for the inclusion of intergenerational programs into the curriculum to influence adolescent career choices and to improve attitudes towards older people[31, 41, 45]. Included studies also called for intergenerational programs to be a “systematic component of care provision”[45] for older adults living in residential aged care, including additional resources, changes to models of care and staff training[11].

Future research where intergenerational interventions are 1) designed using the program theory as articulated within the logic model and 2) tested with stakeholders, may support further understanding what works for whom, and in what circumstances. Realist evaluation or other

1 published frameworks like the 6-SQUID model[62, 63] are methodological options for future  
2 projects. This style of participatory research generates community will and engagement and  
3 supports sustainability without major resource investment, as the community itself 'owns' and is  
4 committed to the intervention they have designed. Future research would also benefit from  
5 addressing the same theory in comparative or specific settings[35], such as in aged care settings  
6 or community groups like Men's sheds.  
7  
8  
9  
10  
11  
12

### 13 **CONCLUSION**

14 This review has identified the circumstances in which social connectedness is optimised for older  
15 adults when taking part in intergenerational interventions with adolescents. Findings have  
16 provided a logic model outlining how intergenerational programs involving adolescents are likely  
17 to improve social connectedness for older adults and builds on the evidence that social  
18 connectedness and social networks are protective for immunity, reduced depression rates and a  
19 reduced risk of frailty[16, 52, 64].  
20  
21  
22  
23  
24  
25

26 In addition to the psychosocial development theory, this review has uncovered the optimal  
27 circumstances that promote social connectedness for older adults. These include setting programs  
28 in the community, including a trained facilitator, leveraging a pedagogic framework and finding  
29 shared goals between participants. Structural elements such as pre-program training and  
30 frequency of sessions was shown to be important in delivering relationship bonds between older  
31 adults and adolescents, that trigger generative behaviours and greater perceived social  
32 connectedness. Intergenerational programs involving adolescents are a possible solution for  
33 enhancing social connectedness and health outcomes for older adults.  
34  
35  
36  
37  
38  
39  
40  
41  
42  
43  
44  
45  
46  
47  
48  
49  
50  
51  
52  
53  
54  
55  
56  
57  
58  
59  
60

### **Authors' contributions**

JS, HV and DA conceived of the project and contributed to the development of the manuscript. JS led the review, HV and DA were the co-reviewers. HV and DA supervised the work and provided guidance in the support of realist methodology. All authors read and approved the final manuscript.

### **Conflict of interest declaration**

The authors declare no conflict of interest and take sole responsibility for the content of this article.

### **Data sharing statement**

All evidence cited in this review is available in the public domain.

### **Funding**

This research was undertaken in part fulfilment of a Master of Public Health degree by JS and did not receive any specific funding.

### **Ethics Approval**

This study did not require ethical approval

### **Acknowledgments**

We would like to acknowledge support from the La Trobe University library staff in conducting initial literature search. We would also like to thank the stakeholders who gave their time to participate in the early stages of this review.

## REFERENCES

1. Grenade L, Boldy D. Social isolation and loneliness among older people: issues and future challenges in community and residential settings. *Australian Health Review*. 2008;32(3):468-78.
2. White H, McConnell E, Clipp E, et al. A randomized controlled trial of the psychosocial impact of providing internet training and access to older adults. *Aging & mental health*. 2002;6(3):213-21.
3. Morton TA, Wilson N, Haslam C, et al. Activating and Guiding the Engagement of Seniors With Online Social Networking: Experimental Findings From the AGES 2.0 Project. *Journal of Aging and Health*. 2018;30(1):27-51.
4. Haslam C. *The New Psychology of Health : Unlocking the Social Cure*. Jetten J, Cruwys T, Dingle G, Haslam A, Haslam C, editors: Florence : Routledge; 2018.
5. Andreoletti C, Howard JL. Bridging the generation gap: Intergenerational service-learning benefits young and old. *Gerontology and Geriatrics Education*. 2018;39(1):46-60.
6. Hodgkin SP, Warburton J, Hancock S. Predicting wellness among rural older Australians: a cross-sectional study. *Rural and remote health*. 2018;18(3):4547.
7. Mellor D, Firth L, Moore K. Can the Internet Improve the Well-being of the Elderly? *Ageing International*. 2008;32(1):25-42.
8. Nycyk M, Redsell M. Intergenerational Relationships and Community Computer Training: Overcoming the Digital Divide. *Journal of Intergenerational Relationships*. 2011;9(1):85-9.
9. Coll-Planas L, Nyqvist F, Puig T, et al. Social capital interventions targeting older people and their impact on health: a systematic review. *J Epidemiol Community Health*. 2017;71(7):663-72.
10. Kaplan M, Sanchez M, Hoffman J. *Intergenerational Strategies for Sustaining Strong Communities. Intergenerational Pathways to a Sustainable Society*. Cham: Springer International Publishing; 2017. p. 109-39.
11. Ostensen E, Gjevjon ER, Oderud T, et al. Introducing Technology for Thriving in Residential Long-Term Care. *J Nurs Scholarsh*. 2017;49(1):44-53.
12. Dickens AP, Richards SH, Greaves CJ, et al. Interventions targeting social isolation in older people: a systematic review. *BMC Public Health*. 2011;11(1):647.
13. Hagan R, Manktelow R, Taylor BJ, et al. Reducing loneliness amongst older people: a systematic search and narrative review. *Aging Ment Health*. 2014;18(6):683-93.
14. Choi M, Kong S, Jung D. Computer and internet interventions for loneliness and depression in older adults: a meta-analysis. *Healthcare informatics research*. 2012;18(3):191.
15. Ronzi S, Orton L, Pope D, et al. What is the impact on health and wellbeing of interventions that foster respect and social inclusion in community-residing older adults? A systematic review of quantitative and qualitative studies. *Syst*. 2018;7(1):26.
16. Berkman LF, Glass T, Brissette I, et al. From social integration to health: Durkheim in the new millennium. *Social science & medicine (1982)*. 2000;51(6):843-57.
17. Glass TA, De Leon CFM, Bassuk SS, et al. Social Engagement and Depressive Symptoms in Late Life: Longitudinal Findings. *Journal of aging and health*. 2006;18(4):604-28.
18. Buffel T, Phillipson C. Can global cities be 'age-friendly cities'? *Urban development and ageing populations*. *Cities*. 2016;55:94-100.
19. Gualano MR, Voglino G, Bert F, et al. The impact of intergenerational programs on children and older adults: A review. *Int Psychogeriatr*. 2018;30(4):451-68.
20. Bagnasco A, Hayter M, Rossi S, et al. Experiences of participating in intergenerational interventions in older people's care settings: A systematic review and meta-synthesis of qualitative literature. *J Adv Nurs*. 2020;76(1):22-33.
21. Springate I, Atkinson, M., & Martin, K. *Intergenerational Practice: a Review of the Literature*. 2008.
22. Gamliel T, Gabay N. Knowledge Exchange, Social Interactions, and Empowerment in an Intergenerational Technology Program at School. *Educational Gerontology*. 2014;40(8):597-617.

- 1
- 2
- 3
- 4 23. Kaplan M. The benefits of intergenerational community service projects: Implications for
- 5 promoting intergenerational unity, community activism, and cultural. *Journal of Gerontological*
- 6 *Social Work*. 1997;27(3):211-28.
- 7 24. Newman S, Hatton-Yeo A. Intergenerational learning and the contributions of older people.
- 8 *Ageing horizons*. 2008;8(10):31-9.
- 9 25. Schroeder K, Ratcliffe SJ, Perez A, et al. Dance for Health: An Intergenerational Program to
- 10 Increase Access to Physical Activity. *Journal of Pediatric Nursing*. 2017;37:29-34.
- 11 26. Kaplan MS. Intergenerational programs in schools: Considerations of form and function.
- 12 *International Review of Education*. 2002;48(5):305-34.
- 13 27. Leedahl SN, Brasher MS, Estus E, et al. Implementing an interdisciplinary intergenerational
- 14 program using the Cyber Seniors® reverse mentoring model within higher education. *Gerontology &*
- 15 *geriatrics education*. 2018:1-19.
- 16 28. Breck BM, Dennis CB, Leedahl SN. Implementing reverse mentoring to address social
- 17 isolation among older adults. *Journal of Gerontological Social Work*. 2018:1-13.
- 18 29. Wilson NJ, Cordier R, Ciccarelli M, et al. Intergenerational mentoring at Men's Sheds: A
- 19 feasibility study. *J Appl Res Intellect Disabil*. 2018;31(1):e105-e17.
- 20 30. Erikson EH. *Childhood and society*. Rev. ed.. ed. London: London Vintage; 1995.
- 21 31. Knight T, Skouteris H, Townsend M, et al. The act of giving: A pilot and feasibility study of the
- 22 My Life Story programme designed to foster positive mental health and well-being in adolescents
- 23 and older adults. *International Journal of Adolescence and Youth*. 2017;22(2):165-78.
- 24 32. Zacher H, Esser L, Bohlmann C, et al. Age, social identity and identification, and work
- 25 outcomes: a conceptual model, literature review, and future research directions. *Work, Aging and*
- 26 *Retirement*. 2019;5(1):24-43.
- 27 33. Kessler E, Staudinger UM. Intergenerational potential: effects of social interaction between
- 28 older adults and adolescents. *Psychology & Aging*. 2007;22(4):690-704.
- 29 34. Wong G, Greenhalgh T, Westhorp G, et al. RAMESES publication standards: realist syntheses.
- 30 *BMC Med*. 2013;11(1):21.
- 31 35. Pawson R, Greenhalgh T, Harvey G, et al. Realist review--a new method of systematic review
- 32 designed for complex policy interventions. *Journal of health services research & policy*. 2005;10
- 33 Suppl 1:21.
- 34 36. Pawson R. *Evidence-based policy: a realist perspective*: sage; 2006.
- 35 37. Rycroft-Malone J, McCormack B, Hutchinson A, et al. Realist synthesis: illustrating the
- 36 method for implementation research. *Implement Sci*. 2012;7(1):33.
- 37 38. Wong G, Westhorp G, Manzano A, et al. RAMESES II reporting standards for realist
- 38 evaluations.(Report). *BMC Med*. 2016;14(1).
- 39 39. Long A. Evaluative tool for mixed method studies. University of Leeds, School of
- 40 Healthcare[online]. 2005;24:2017.
- 41 40. Critical Appraisal Skills Programme (CASP). CASP qualitative checklists [online]. 2018.
- 42 41. de Souza EM. Intergenerational interaction in health promotion: a qualitative study in Brazil.
- 43 *Rev Saude Publica*. 2003;37(4):463-9.
- 44 42. Hernandez CR, Gonzalez MZ. Effects of intergenerational interaction on aging. *Educational*
- 45 *Gerontology*. 2008;34(4):292-305.
- 46 43. Wilson NJ, Cordier R, Wilson Whatley L. Older male mentors' perceptions of a Men's Shed
- 47 intergenerational mentoring program. *Australian Occupational Therapy Journal*. 2013;60(6):416-26.
- 48 44. Biggs MJG, Knox KS. Lessons Learned from an Intergenerational Volunteer Program: A Case
- 49 Study of a Shared-Site Model. *Journal of Intergenerational Relationships*. 2014;12(1):54-68.
- 50 45. Santini S, Tombolesi V, Baschiera B, et al. Intergenerational Programs Involving Adolescents,
- 51 Institutionalized Elderly, and Older Volunteers: Results from a Pilot Research-Action in Italy. *BioMed*
- 52 *Research International*. 2018:1-14.
- 53 46. Programme CAS. CASP qualitatitve checklist. 2018.
- 54
- 55
- 56
- 57
- 58
- 59
- 60



- 1
- 2
- 3
- 4 47. Biggs S, Lowenstein A. Generational intelligence a critical approach to age relations 2013. 1-181 p.
- 5 48. Kaplan MS. School-based intergenerational programs: Citeseer; 2001.
- 6 49. Institute of Cultural Affairs. What is facilitation? 2019 [cited 2022 October]. Available from: <https://ica-uk.org.uk/what-we-mean-by-facilitation/>.
- 7
- 8 50. Salari SM. Intergenerational partnerships in adult day centers: Importance of age-appropriate environments and behaviors. *The Gerontologist*. 2002;42(3):321-33.
- 9
- 10 51. Harris PB, Caporella CA. An Intergenerational Choir Formed to Lessen Alzheimer's Disease Stigma in College Students and Decrease the Social Isolation of People With Alzheimer's Disease and Their Family Members: A Pilot Study. *American Journal of Alzheimer's Disease & Other Dementias*. 2014;29(3):270-81.
- 11
- 12 52. Feng Z, Lugtenberg M, Franse C, et al. Risk factors and protective factors associated with incident or increase of frailty among community-dwelling older adults: A systematic review of longitudinal studies. *PLoS ONE*. 2017;12(6):e0178383.
- 13
- 14 53. Gleibs IH, Haslam C, Haslam SA, et al. Water clubs in residential care: Is it the water or the club that enhances health and well-being? *Psychology & health*. 2011;26(10):1361-77.
- 15
- 16 54. Sakurai R, Yasunaga M, Murayama Y, et al. Long-term effects of an intergenerational program on functional capacity in older adults: Results from a seven-year follow-up of the REPRINTS study. *Archives of Gerontology and Geriatrics*. 2016;64:13-20.
- 17
- 18 55. Whitehouse P, Bendezu E, Fallcreek S, et al. Intergenerational community schools: a new practice for a new time. *Educational Gerontology*. 2000;26(8):761-70.
- 19
- 20 56. Dauenhauer J, Steitz DW, Cochran LJ. Fostering a new model of multigenerational learning: Older adult perspectives, community partners, and higher education. *Educational Gerontology*. 2016;42(7):483-96.
- 21
- 22 57. Murayama Y, Murayama H, Hasebe M, et al. The impact of intergenerational programs on social capital in Japan: a randomized population-based cross-sectional study. *BMC Public Health*. 2019;19(1):1-9.
- 23
- 24 58. Cattan M, White M, Bond J, et al. Preventing social isolation and loneliness among older people: a systematic review of health promotion interventions. *Ageing and Society*. 2005;25(01):41-67.
- 25
- 26 59. Martins T, Midão L, Martínez Veiga S, et al. Intergenerational Programs Review: Study Design and Characteristics of Intervention, Outcomes, and Effectiveness. *Journal of Intergenerational Relationships*. 2018;17(1):93-109.
- 27
- 28 60. Price B. Approaches to counter loneliness and social isolation. *Nursing Older People*. 2015;27(7):31-9.
- 29
- 30 61. Ferguson L. Tackling loneliness in older age – why we need action by all ages. *Quality in Ageing & Older Adults*. 2012;13(4):264-9.
- 31
- 32 62. Belford M, Robertson T, Jepson R. Using evaluability assessment to assess local community development health programmes: a Scottish case-study. *BMC Medical Research Methodology*. 2017;17(1):70.
- 33
- 34 63. Hartley JE, McAteer J, Doi L, et al. CARE: The development of an intervention for kinship carers with teenage children. *Qualitative Social Work*. 2018:1473325018783823.
- 35
- 36 64. Soysal P, Veronese N, Thompson T, et al. Relationship between depression and frailty in older adults: A systematic review and meta-analysis. *Ageing Res Rev*. 2017;36:78-87.
- 37
- 38
- 39
- 40
- 41
- 42
- 43
- 44
- 45
- 46
- 47
- 48
- 49
- 50
- 51
- 52
- 53
- 54
- 55
- 56
- 57
- 58
- 59
- 60

1  
2  
3  
4  
5  
6  
7  
8  
9  
10  
11  
12  
13  
14  
15  
16  
17  
18  
19  
20  
21  
22  
23  
24  
25  
26  
27  
28  
29  
30  
31  
32  
33  
34  
35  
36  
37  
38  
39  
40  
41  
42  
43  
44  
45  
46  
47  
48  
49  
50  
51  
52  
53  
54  
55  
56  
57  
58  
59  
60

For peer review only



Figure 1: Flow diagram

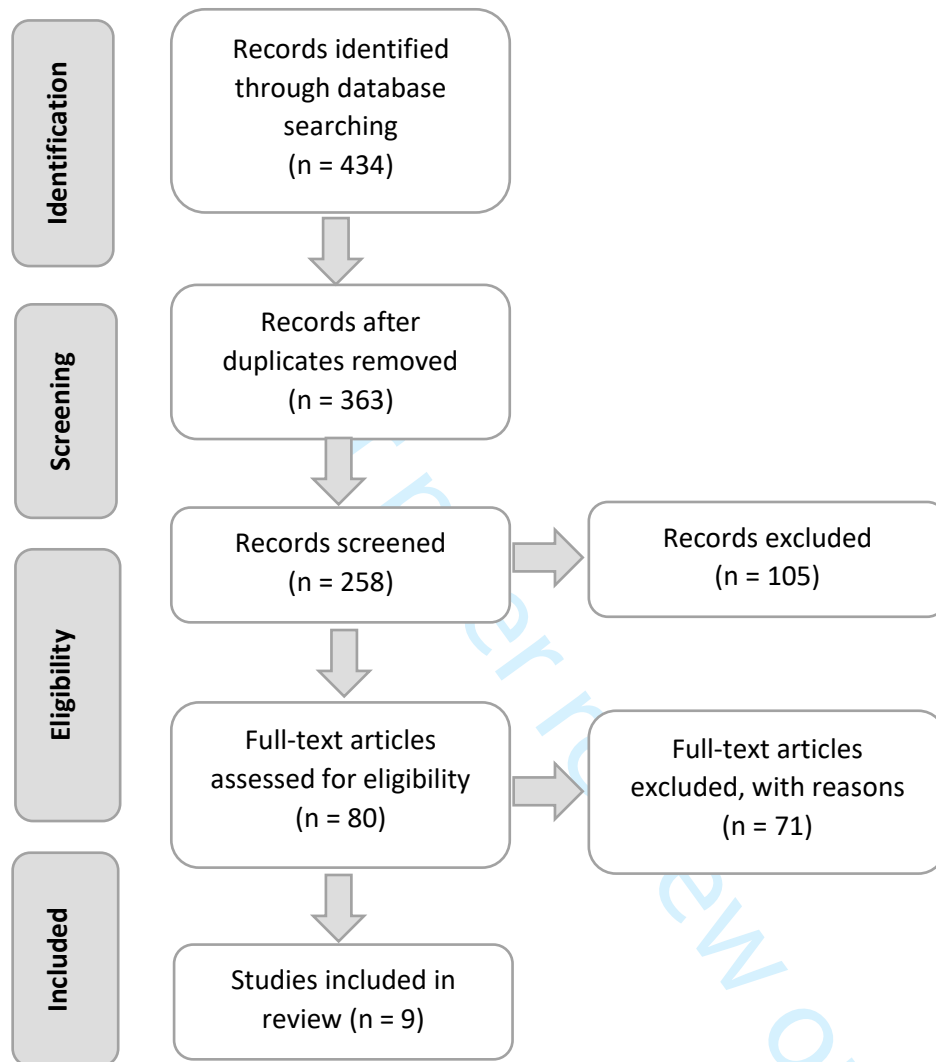

Figure 2: Logic model

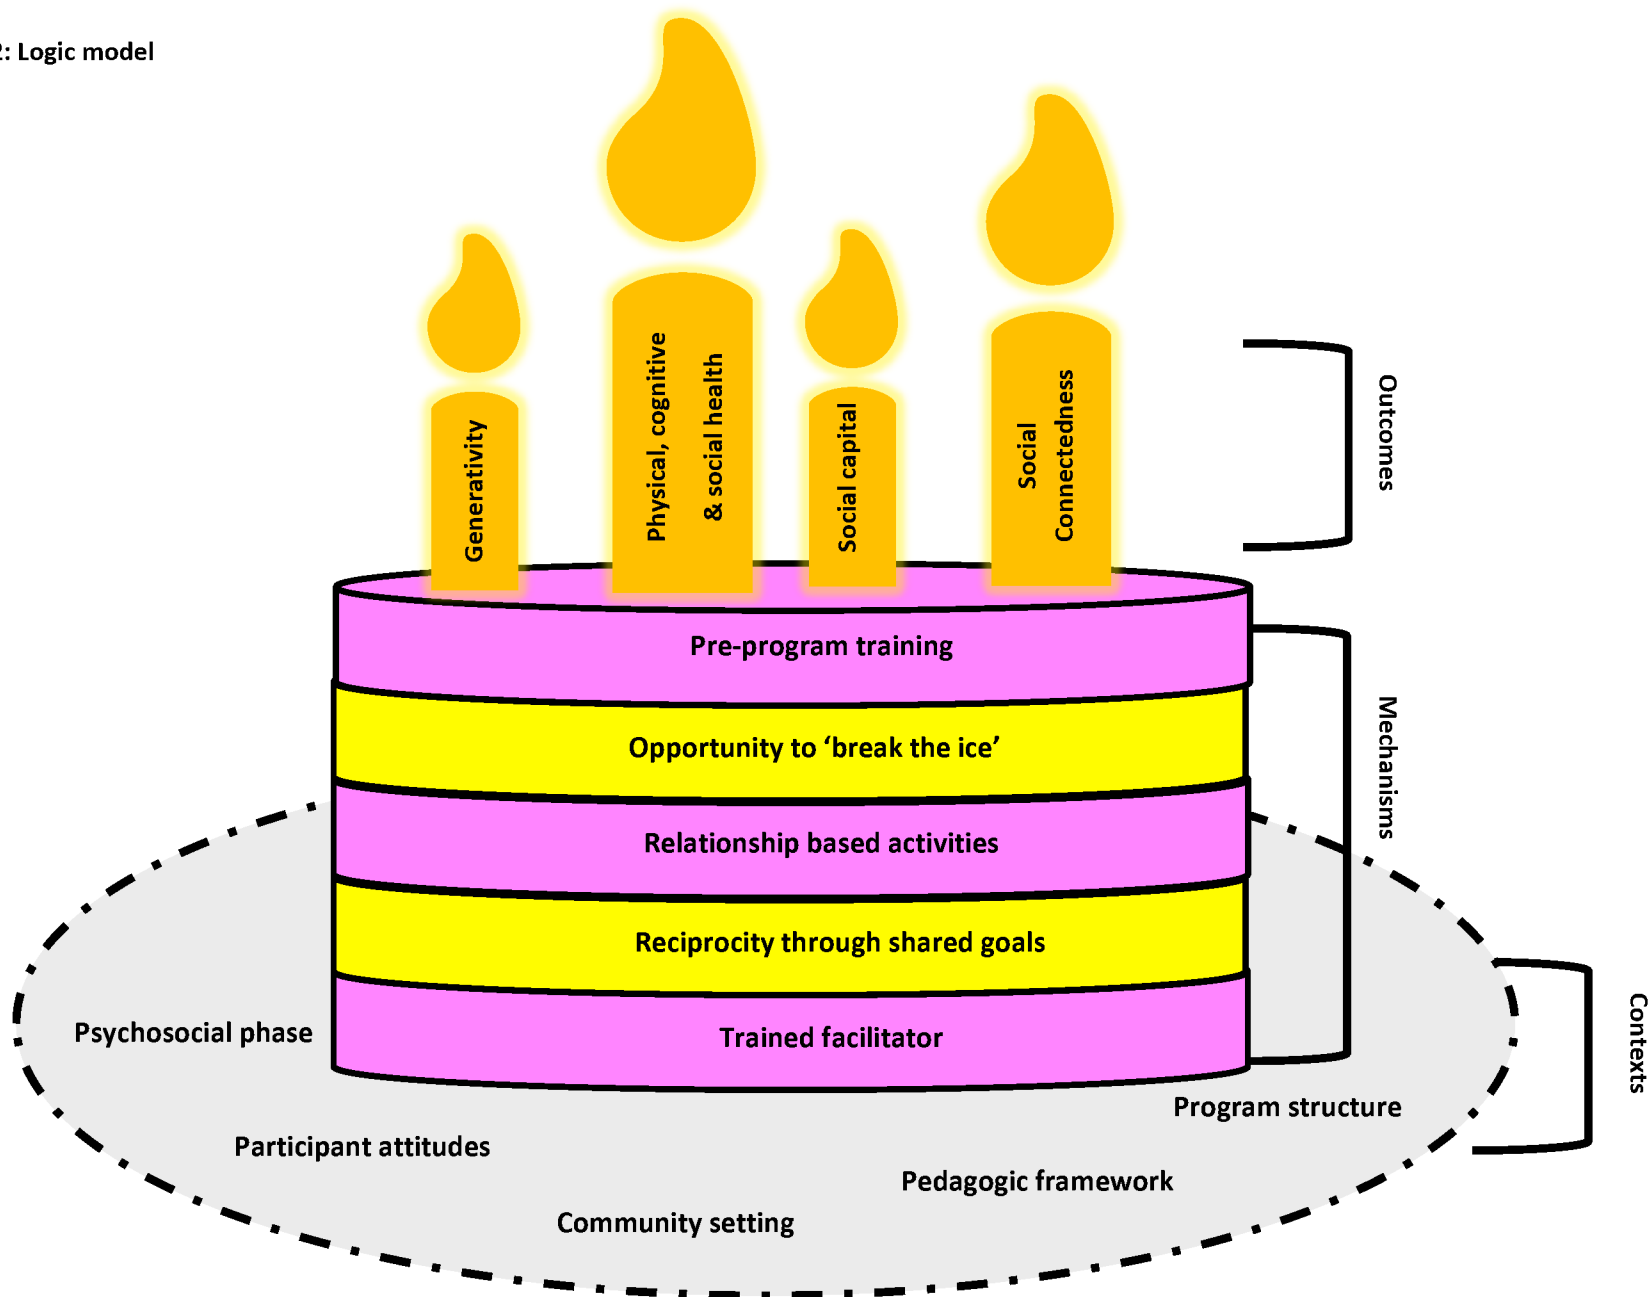

1  
2  
3  
4  
5 **SUPPLEMENTARY FILE 1: DATA EXTRACTION FORM**  
6  
7

| <b>1. Bibliographic details</b>                                                           |  |
|-------------------------------------------------------------------------------------------|--|
| Article number:                                                                           |  |
| Article reference:                                                                        |  |
| Extracted by:                                                                             |  |
| Checked by:                                                                               |  |
| Researcher details (discipline or professional background)                                |  |
| What are the geographic details of the study?                                             |  |
| <b>2. Aims and Methods</b>                                                                |  |
| What is the study type?                                                                   |  |
| What methods were used?                                                                   |  |
| Are the aims/ objectives clearly stated in the study? Detail                              |  |
| Is the research question/s stated explicitly or within the text? Detail                   |  |
| What materials were used to collect the data?                                             |  |
| How was the data analysed?                                                                |  |
| Does the intervention use a particular theory to inform its design?                       |  |
| <b>3. Participants</b>                                                                    |  |
| What was the sample size?                                                                 |  |
| What were the sample characteristics?                                                     |  |
| How were participants recruited?                                                          |  |
| What were the inclusion and exclusion criteria?                                           |  |
| <b>4. Intervention details</b>                                                            |  |
| What was the intervention?                                                                |  |
| How was the intervention delivered?                                                       |  |
| Who is delivering the intervention?                                                       |  |
| In what setting was the intervention delivered?<br>Why was this setting / context chosen? |  |
| Was this setting appropriate to examine the research question?                            |  |
| Was the intervention designed with the participants (one or both age groups)?             |  |
| How were adolescents involved in the intervention?                                        |  |

|    |                                                                                                                                                                                                                                  |  |
|----|----------------------------------------------------------------------------------------------------------------------------------------------------------------------------------------------------------------------------------|--|
| 1  | How were older people involved in the intervention?                                                                                                                                                                              |  |
| 2  |                                                                                                                                                                                                                                  |  |
| 3  |                                                                                                                                                                                                                                  |  |
| 4  |                                                                                                                                                                                                                                  |  |
| 5  | <b>5. Findings/ Results</b>                                                                                                                                                                                                      |  |
| 6  | What was the reported experiences of the participants?                                                                                                                                                                           |  |
| 7  |                                                                                                                                                                                                                                  |  |
| 8  | What was the reported experience of the facilitators?                                                                                                                                                                            |  |
| 9  |                                                                                                                                                                                                                                  |  |
| 10 | Did the intervention focus on/ impact on social connectedness?                                                                                                                                                                   |  |
| 11 |                                                                                                                                                                                                                                  |  |
| 12 | Did the adolescents report (or was it reported by others) greater understanding of older people?                                                                                                                                 |  |
| 13 |                                                                                                                                                                                                                                  |  |
| 14 |                                                                                                                                                                                                                                  |  |
| 15 | Did the older people report (or was it reported by others) impact upon social connectedness?                                                                                                                                     |  |
| 16 |                                                                                                                                                                                                                                  |  |
| 17 |                                                                                                                                                                                                                                  |  |
| 18 | Did the older people report (or was it reported by others) impact upon overall health and wellbeing?                                                                                                                             |  |
| 19 |                                                                                                                                                                                                                                  |  |
| 20 |                                                                                                                                                                                                                                  |  |
| 21 | Did the older people report (or was it reported by others) greater understanding of the younger generation?                                                                                                                      |  |
| 22 |                                                                                                                                                                                                                                  |  |
| 23 |                                                                                                                                                                                                                                  |  |
| 24 | Did the age range of the participants impact upon the success of the intervention? Were there structural barriers here e.g. transport, health issues?                                                                            |  |
| 25 |                                                                                                                                                                                                                                  |  |
| 26 |                                                                                                                                                                                                                                  |  |
| 27 |                                                                                                                                                                                                                                  |  |
| 28 |                                                                                                                                                                                                                                  |  |
| 29 | What themes (qualitative) / headline findings (quantitative) were generated by the study? (around intergenerational programs, adolescents, older people, context in which delivered/ undertaken)                                 |  |
| 30 |                                                                                                                                                                                                                                  |  |
| 31 |                                                                                                                                                                                                                                  |  |
| 32 |                                                                                                                                                                                                                                  |  |
| 33 | Are the findings interpreted within the contexts of other studies and theory?                                                                                                                                                    |  |
| 34 |                                                                                                                                                                                                                                  |  |
| 35 | <b>6. Were the <i>a priori</i> theories supported/ confirmed?</b>                                                                                                                                                                |  |
| 36 | That intergenerational programs involving adolescents and older adults improve social connectedness in the older adult group                                                                                                     |  |
| 37 |                                                                                                                                                                                                                                  |  |
| 38 | That intergenerational programs conducted in educational contexts result in positive outcomes in social connectedness for one/both groups                                                                                        |  |
| 39 |                                                                                                                                                                                                                                  |  |
| 40 | Adolescents and older people are at a similar psychological milestone and therefore are mutual beneficiaries of intergenerational programs                                                                                       |  |
| 41 |                                                                                                                                                                                                                                  |  |
| 42 | Older people may be socially disconnected in the absence of loneliness- intergenerational programs help support meaningful connections within the community, with individuals outside of their normal age and social demographic |  |
| 43 |                                                                                                                                                                                                                                  |  |
| 44 | Greater generativity is formed through participation in intergenerational programs                                                                                                                                               |  |
| 45 |                                                                                                                                                                                                                                  |  |
| 46 | Intergenerational programs conducted in educational contexts build community connections between generations and across structural community assets like schools.                                                                |  |
| 47 |                                                                                                                                                                                                                                  |  |
| 48 | What new theories were generated by this study?                                                                                                                                                                                  |  |
| 49 |                                                                                                                                                                                                                                  |  |
| 50 |                                                                                                                                                                                                                                  |  |
| 51 |                                                                                                                                                                                                                                  |  |
| 52 |                                                                                                                                                                                                                                  |  |
| 53 |                                                                                                                                                                                                                                  |  |
| 54 |                                                                                                                                                                                                                                  |  |
| 55 |                                                                                                                                                                                                                                  |  |
| 56 |                                                                                                                                                                                                                                  |  |
| 57 |                                                                                                                                                                                                                                  |  |
| 58 |                                                                                                                                                                                                                                  |  |
| 59 |                                                                                                                                                                                                                                  |  |
| 60 |                                                                                                                                                                                                                                  |  |

1  
2  
3  
4  
5 **SUPPLEMENTARY FILE 2: QUALITY ASSESSMENT**  
6

7  
8

| Quality Assessment Criteria |                                                                                                                                                                                          |
|-----------------------------|------------------------------------------------------------------------------------------------------------------------------------------------------------------------------------------|
| 9 <b>1</b>                  | Is there adequate rationale for using this design to address the research aim/ question?                                                                                                 |
| 10 <b>2</b>                 | Did the authors justify the sample size used?                                                                                                                                            |
| 11 <b>3</b>                 | Is adequate evidence provided to support the findings?                                                                                                                                   |
| 12 <b>4</b>                 | Quantitative Studies: When comparing / analysing the groups (if more than one), did the authors consider the<br>- Comparability<br>- Confounding variables<br>and controlling for these? |
| 13 <b>5</b>                 | Qualitative Studies: Did the researchers consider their own position, assumptions and possible biases?                                                                                   |
| 14 <b>6</b>                 | Were the strengths and limitations stated?                                                                                                                                               |
| 15 <b>7</b>                 | Was ethical committee approval obtained?                                                                                                                                                 |
| 16 <b>8</b>                 | How valuable is this research to the review? High, Medium or Low                                                                                                                         |

17  
18  
19  
20  
21  
22  
23  
24  
25  
26  
27  
28  
29  
30  
31  
32  
33  
34  
35  
36  
37  
38  
39  
40  
41  
42  
43  
44  
45  
46  
47  
48  
49  
50  
51  
52  
53  
54  
55  
56  
57  
58  
59  
60

# BMJ Open

## Circumstances that promote social connectedness in older adults participating in intergenerational programs with adolescents: a realist review

|                                 |                                                                                                                                                                                                                                                            |
|---------------------------------|------------------------------------------------------------------------------------------------------------------------------------------------------------------------------------------------------------------------------------------------------------|
| Journal:                        | <i>BMJ Open</i>                                                                                                                                                                                                                                            |
| Manuscript ID                   | bmjopen-2022-069765.R1                                                                                                                                                                                                                                     |
| Article Type:                   | Original research                                                                                                                                                                                                                                          |
| Date Submitted by the Author:   | 13-Apr-2023                                                                                                                                                                                                                                                |
| Complete List of Authors:       | Simionato, J; La Trobe University, Department of Public Health<br>Vally, H; Deakin University, Institute for Health Transformation<br>Archibald, Daryll; University of Dundee, School of Health Sciences; La Trobe University, Department of Public Health |
| <b>Primary Subject Heading</b>: | Public health                                                                                                                                                                                                                                              |
| Secondary Subject Heading:      | Sociology                                                                                                                                                                                                                                                  |
| Keywords:                       | PUBLIC HEALTH, SOCIAL MEDICINE, PREVENTIVE MEDICINE                                                                                                                                                                                                        |
|                                 |                                                                                                                                                                                                                                                            |

SCHOLARONE™  
Manuscripts



I, the Submitting Author has the right to grant and does grant on behalf of all authors of the Work (as defined in the below author licence), an exclusive licence and/or a non-exclusive licence for contributions from authors who are: i) UK Crown employees; ii) where BMJ has agreed a CC-BY licence shall apply, and/or iii) in accordance with the terms applicable for US Federal Government officers or employees acting as part of their official duties; on a worldwide, perpetual, irrevocable, royalty-free basis to BMJ Publishing Group Ltd ("BMJ") its licensees and where the relevant Journal is co-owned by BMJ to the co-owners of the Journal, to publish the Work in this journal and any other BMJ products and to exploit all rights, as set out in our [licence](#).

The Submitting Author accepts and understands that any supply made under these terms is made by BMJ to the Submitting Author unless you are acting as an employee on behalf of your employer or a postgraduate student of an affiliated institution which is paying any applicable article publishing charge ("APC") for Open Access articles. Where the Submitting Author wishes to make the Work available on an Open Access basis (and intends to pay the relevant APC), the terms of reuse of such Open Access shall be governed by a Creative Commons licence – details of these licences and which [Creative Commons](#) licence will apply to this Work are set out in our licence referred to above.

Other than as permitted in any relevant BMJ Author's Self Archiving Policies, I confirm this Work has not been accepted for publication elsewhere, is not being considered for publication elsewhere and does not duplicate material already published. I confirm all authors consent to publication of this Work and authorise the granting of this licence.

1  
2  
3  
4  
5  
6  
7  
8  
9  
10  
11  
12  
13  
14  
15  
16  
17  
18  
19  
20  
21  
22  
23  
24  
25  
26  
27  
28  
29  
30  
31  
32  
33  
34  
35  
36  
37  
38  
39  
40  
41  
42  
43  
44  
45  
46  
47  
48  
49  
50  
51  
52  
53  
54  
55  
56  
57  
58  
59  
60

## **Circumstances that promote social connectedness in older adults participating in intergenerational programs with adolescents: a realist review**

Authors: Simionato J<sup>1</sup>, Vally H<sup>2</sup> and Archibald D<sup>1,3</sup>

<sup>1</sup> Department of Public Health, La Trobe University, Plenty Road and Kingsbury Drive, VIC 3086 Australia

<sup>2</sup> School of Health and Social Development, Deakin University, 221 Burwood Highway, Burwood, VIC 3125, Australia

<sup>3</sup> School of Health Sciences, University of Dundee, 11 Airlie Place, Dundee DD1 4HJ, Dundee, United Kingdom

Key words: Intergenerational Program, Older adults, Adolescents, Social Connectedness, Realist Review

Corresponding author:

Dr Daryll Archibald, School of Health Sciences, University of Dundee, 11 Airlie Place, Dundee DD1 4HJ. Email: [DArchibald001@dundee.ac.uk](mailto:DArchibald001@dundee.ac.uk)

**Word Count: 5962**



**ABSTRACT**

**Objectives:** Limited social connectedness in older adults is a risk factor for poor physical and mental health. Older adults who are socially isolated, lonely and disconnected have a higher risk of chronic illness, depression and premature death. Current literature suggests that improved social connectedness reduces these risks. Intergenerational programs are an effective way to improve health outcomes. Despite this, there is yet to be a review using realist review methods that seeks to identify the circumstances that promote social connectedness in older adults participating in intergenerational programs with adolescents.

**Method:** A realist review methodology was chosen to account for the complexity of intergenerational interventions. Nine studies were included. In line with realist review methodology, iterative data extraction and analysis was conducted to identify the specific contexts, mechanisms, and outcomes of the programs. Specific circumstances were identified to develop theories relating to improved social connectedness in older adults.

**Results:** The nine included studies were set in different contexts, including community organisations, schools and aged care facilities and used an array of interventions including reminiscence therapy, craft, or space for conversation. Despite study heterogeneity, the parallels in psychosocial development between older adults and adolescents were shown to be a likely driver for improved social health outcomes. Programs most likely to improve social health outcomes were those that acknowledged psychosocial development, were delivered in community settings, leveraged pedagogic frameworks, used trained facilitators, and supported participants to build relationships through shared purpose.

**Conclusions:** This review contributes a logic model to support the design and development of intergenerational programs involving adolescents to improve social connectedness in older adults. Future research to test the logic model in practice is needed.

### Strengths and limitations of this study

- This is the first realist review to investigate the circumstances that promote social connectedness in older adults participating in intergenerational programs with adolescents
- Comprehensive searches were undertaken with the aim of identifying all relevant published and grey literature.
- A logic model has been developed to support the design and development of intergenerational programs involving adolescents to improve social connectedness in older adults.
- The evidence base is limited for participants living in rural locations and participants with cognitive impairment.

## INTRODUCTION

Limited social connectedness is a risk for poor health and wellbeing in older adults[1-4]. Older adults (over 65 years) are at particular risk of social disconnectedness and loneliness because of frailty and chronic illness, which may limit opportunities for social interaction[5, 6]. In addition, modern society has altered family structures, geographically dispersed the family unit and made maintaining intergenerational and family connections challenging, adding to social health vulnerability in older people[7-10]. Many older adults move into residential aged care facilities, away from familiar community supports which may impact social connectedness.

Social disconnectedness, loneliness and social isolation can be as damaging to health and wellbeing as smoking and obesity[4, 7, 11, 12]. Poor health due to acute or chronic conditions, cognitive decline or frailty influences an older person's ability to carry out personal, domestic, social or community activities and in turn increases their risk of social disconnectedness[1, 13, 14]. Older adults who remain socially connected without episodes of isolation or loneliness have lower rates of mental and chronic illnesses such as depression and cardiovascular disease[7, 11, 15-17].

Support for older adults, particularly post retirement or when faced with cognitive or physical impairment, is essential in maintaining individual social identity and social connectedness with family, friends and the community[4, 11]. The World Health Organization has challenged communities to provide age friendly communities. This global movement is demonstrating the power of building social capital and engaging older adults through community programs and social and environmental infrastructure to support community access[18]. Intergenerational programs have emerged as a popular and beneficial option for bolstering community connections and improving the health and wellbeing of older people[11, 19, 20].

Intergenerational programs are programs where two generations experience mutual benefit through shared experiences[19, 21] and are a known mechanism for improving social connectedness[19] and providing a sense of inclusion and empowerment in older adults[22]. Intergenerational programs bring together and benefit both generational groups[22-26] and have been adopted in a variety of contexts and age groups. These include the use of pedagogic frameworks with school age children[22], service-learning interventions with university students[27, 28] and in familial groups[25].

Several previous reviews have been undertaken on intergenerational programming. For example, systematic reviews by Gualano et al.[19] and Zhong et al.[29] focused on quantitative studies of older adults aged 50 and over and younger people 30 and below undertaken in educational settings. Gualano et al.[19] found that intergenerational programs benefit older people in terms

1  
2 of keeping active and fighting social isolation, whilst Zhong et al. [29] found that intergenerational  
3 programs with young children may bring the greatest health benefits to older people across  
4 physical, mental and social domains. Further systematic reviews by Giraudeau and Bailly[30] and  
5 Martins et al.[31] included primary research studies of any type focusing on adults over 60[30]  
6 and 65[31] undertaken in a variety of community, assisted living, education, and nursing home  
7 settings. Giraudeau and Bailly[30] found that intergenerational programs bring mental health  
8 benefits for older people, whilst Martins et al.[31] reported that intergenerational programs can  
9 lead to reaffirmation of value, greater life satisfaction and improved self-esteem for older  
10 adults[31].

11  
12 In terms of impacts on children, both Martins et al.[31] and Giraudeau and Bailly[30] focused on  
13 pre-school and primary school children and found that intergenerational programs improved  
14 children's perceptions of older people. In addition, Martins et al.[31] further found that for  
15 children, intergenerational programs led to higher self-esteem, better academic performance,  
16 improved social skills and a greater motivation to learn. Gualano et al.[19] also found that  
17 intergenerational programs improved younger people's perceptions of older people. Of these  
18 systematic reviews only Giraudeau and Bailly[30] outlined circumstances that may lead to a  
19 successful intergenerational program model, stating that to be successful, intergenerational  
20 programs should provide all the participants with a sense of being useful and competent and take  
21 time to prepare younger and older people by encouraging communication between the groups  
22 before the program begins.

23  
24 A further relevant review undertaken in this area is a recently published realist review by Phang  
25 et al.[32]. This work focused on digital intergenerational programs explicitly geared towards  
26 reducing loneliness or social isolation in older adults undertaken in residential or community  
27 settings. The review identified four circumstances by which digital intergenerational program may  
28 reduce loneliness and social isolation for older adults. For community-dwelling older adults,  
29 training in digital technology and support from nurses helped to reduce loneliness. Phang et al.[32]  
30 further found that a video call with a student or family reduced loneliness among older adults  
31 residing in long-term residential care facilities, whilst videoconferencing with a lay coach may also  
32 reduce loneliness in adults who are lonely.

33  
34 The above shows that whilst there is substantial evidence supporting intergenerational programs  
35 as an effective strategy to achieve improved physical and social health and wellbeing in older  
36 adults, there is yet to be a review of programs that involve adolescents specifically.  
37 Intergenerational programs involving older adults and preschool or young children have been  
38 reported in the primary research literature [14, 21, 22, 28], however those that pair adolescents  
39 (individuals aged 13-19) and older adults are less known[33]. Pairing older adults and adolescents

1 through intergenerational programs is modelled on Erikson's theory of psychosocial  
2 development[34, 35]. According to Erikson's theory, adolescents and older adults are both facing  
3 a period in their psychosocial development focused on identity. Adolescents, emerging from  
4 childhood are looking to their peers to 'fit in' and to understand society through the eyes of others.  
5 Older adults, particularly the recently retired, are trying to maintain their identity, with a desire  
6 to contribute to society[36]. This motivation to pass on wisdom to the next generation is termed  
7 generativity[34, 35] and is important for the wellbeing of older adults as well as broader social  
8 health[4]. Intergenerational interactions through family or a formal program support the  
9 development of generativity[34, 35, 37]. The likely benefits of this generational pairing in an  
10 intergenerational program context are yet to be reviewed in depth.

11 This realist review aims to identify the circumstances in which social connectedness is optimised  
12 for older adults when taking part in intergenerational interventions with adolescents. The  
13 question underpinning the review is – which circumstances promote social connectedness in older  
14 adults participating in intergenerational programs with adolescents.  
15  
16  
17  
18  
19  
20  
21  
22  
23  
24  
25  
26  
27  
28  
29  
30  
31  
32  
33  
34  
35  
36  
37  
38  
39  
40  
41  
42  
43  
44  
45  
46  
47  
48  
49  
50  
51  
52  
53  
54  
55  
56  
57  
58  
59  
60

## METHODOLOGY

A realist review methodology was undertaken in line with the RAMESES publication standards[38]. The RAMESES checklist for this study is available in Supplementary file 1. Realist review provides a framework for understanding complex interventions and *why* they deliver the outcomes they do[39]. A protocol for the review was developed following the stages outlined by Pawson[40] and included (1) locating existing theories, (2) searching for evidence, (3) selecting articles, (4) extracting and organising data, and (5) synthesising the evidence and drawing conclusions. This is available in Supplementary file 2.

A realist review is an approach used for systematic evidence review that utilises secondary data to understand the reasons why a particular set of contexts, mechanisms and outcomes lead to a particular result. Contexts are the circumstances in which the program is delivered and how these interact with the program mechanisms. Mechanisms are the program resources, and the way participants interact with them. The result of context and mechanism interaction is what drives a particular outcome to occur. Realist review utilises generative understanding to iteratively build *a priori* theories that are then tested and refined. The *a priori* theories are initially drawn from available literature and through stakeholder consultation. Realist review uses the lenses of context, mechanism and outcome to appraise, synthesise and then test the recommendations that are constructed through the analysis process[38, 39].

### Step one: a priori theory development

The development of *a priori* theories was an iterative, two-part process[38, 39, 41] and was undertaken by JS and DA. This included stakeholder engagement and a scoping search of the peer-reviewed and grey literature on the subject, followed by *a priori* theory development that were tested against the literature and information from initial stakeholder meetings.

### Search strategy

A literature search was undertaken between May and July 2019 by JS and DA. An updated search was completed in June 2020. The search strategy was developed with the support of a La Trobe University librarian. MEDLINE, PsychINFO, CINAHL were searched using English language limitation.

The search terms were (Aged OR "older adult" OR senior OR elder\* OR geriatric OR "old\* person\*") AND ("intergenerational relation\*" OR "intergenerational program\*" OR "intergenerational activit\*" OR "intergenerational practice" OR "intergenerational learning" OR "intergenerational service learning" OR "intergenerational relations" OR intergenerational) AND ("social connect\*" OR "social isolation" OR "social interact\*" OR loneliness OR "social

1 participation") AND ("adolescent"). MeSH terms used were "Aged" OR "Aged, 80 and over) and  
2  
3 "Intergenerational relations".  
4

5 Google Scholar was used to supplement the search using a simplified search terms list. Grey  
6 literature used the same search terms and was accessed via websites, including relevant  
7 government and non-government websites including Australian Federal and State Government  
8 agencies, Not-for profits and the World Health Organization. Reference list searching was also  
9 used. The full search strategy is available in supplementary file 3.  
10  
11  
12  
13

#### 14 *Patient and public involvement*

15 No patients or members of the public were involved in this research.  
16

#### 17 *Stakeholder engagement*

18 The idea for this review came from a collaboration involving the authors, a municipality in regional  
19 Victoria, Australia, and a high school located within that municipality. Originally, the collaboration  
20 was centred on the development and evaluation of a pilot intergenerational digital literacy  
21 program involving adolescent school pupils and older community-dwelling individuals. However,  
22 during the initial stages of designing the program, the authors identified there was an absence of  
23 review-level evidence regarding intergenerational programs involving adolescents and older  
24 people. A decision was made to undertake a realist review on this topic. Municipal and high school  
25 collaborator stakeholders, namely senior teachers, municipal project officers and positive ageing  
26 ambassadors, were involved in the process of generating *a priori* theories by contributing  
27 information on the need and opportunity for intergenerational programs in the school  
28  
29  
30  
31  
32  
33  
34  
35  
36  
37

#### 38 *Study selection*

39 The inclusion and exclusion criteria were applied by JS and DA to ensure the included studies  
40 met the aim of the review. Included participants were aged 65 and over (older adults) and  
41 between 13 and 19 years (adolescents) as these age ranges are agreed as defining older adults  
42 and adolescents[34] in early theories from Erikson on psychological development. Other studies  
43 addressing intergenerational programs use Erikson theory, so this was chosen to align with the  
44 current literature [31]. To be included in the review studies had to report on intergenerational  
45 programs with participants from non-familial generations. Studies had to be published in English  
46 between 2000 and 2020 and could be quantitative, qualitative or mixed-methods primary  
47 research studies. The full inclusion and exclusion criteria can be viewed in supplementary file 4.  
48  
49  
50  
51  
52  
53  
54  
55  
56  
57  
58  
59  
60

1  
2  
3  
4  
5  
6  
7  
8  
9  
*a priori* theory development

10  
11  
12  
13  
14  
15  
16  
17  
18  
19  
20  
21  
22  
23  
24  
25  
26  
27  
28  
29  
30  
31  
32  
33  
34  
35  
36  
37  
38  
39  
40  
41  
42  
43  
44  
45  
46  
47  
48  
49  
50  
51  
52  
53  
54  
55  
56  
57  
58  
59  
60  
JS and DA developed six *a priori* theories and tested these against the literature before conducting a final literature search to check for new evidence.

**Step two: data extraction and evidence synthesis**

In step two, data extraction and evidence synthesis from the nine included studies was undertaken.

*Data extraction*

A data extraction form (supplementary file 5) was developed by DA and JS and included the *a priori* theories identified in step one. The data extraction form covered several domains including bibliographic information, aims and methods, participant details, intervention details, results and findings. The form also provided for *a priori* theory testing including extraction of evidence that proved, disproved or refined the theory. The data extraction process was completed by JS and DA.

*Quality appraisal*

A realist review method supports the inclusion of qualitative, quantitative and mixed methods studies[38, 42]. To understand the quality of included articles, we consulted critical appraisal literature[43, 44]. A tool comprising eight quality assessment criteria were developed focusing on the methodological quality and reporting quality of the included studies (supplementary file 6). Quality appraisal was conducted by JS and DA with any conflicts managed via team discussion.

*Synthesis*

All authors were involved in the evidence synthesis process using extracted data to illuminate the contexts, mechanisms and outcomes that underpinned reviewed programs. The process then involved identifying evidence combinations and testing them against the *a priori* theories to develop context mechanism outcome configurations (CMOC). The development of the CMOC presented a variety of emergent issues that were continually tested against the *a priori* theories and the known evidence. This process identified new theories and the CMOC were further refined. Ethics approval was not required for this study.



## RESULTS

Data from the included studies were synthesised to generate eight theories relating to characteristics of intergenerational programs likely to optimise social connectedness for older adults. The components of these theories are combined to form context mechanism outcome configurations (CMOC) and a logic model to support answering the question – which circumstances promote social connectedness in older adults participating in intergenerational programs with adolescents? Figure 1 below provides the results of the literature search. Nine studies were included in the review.

**\*Insert here\_Figure 1: Flow Diagram**

Table 1: Included study characteristics

| Included Study                    | Study details                                                                                                                                                                        | Study aim                                                                                                                                    | Sample characteristics                                                                                                                                          | Summary of findings                                                                                                                        | Use of a facilitator | Pre-program training   | Data collection and analysis                                                                                                                                                          |
|-----------------------------------|--------------------------------------------------------------------------------------------------------------------------------------------------------------------------------------|----------------------------------------------------------------------------------------------------------------------------------------------|-----------------------------------------------------------------------------------------------------------------------------------------------------------------|--------------------------------------------------------------------------------------------------------------------------------------------|----------------------|------------------------|---------------------------------------------------------------------------------------------------------------------------------------------------------------------------------------|
| <b>de Souza[45]</b>               | Qualitative; School (Brazil); Older adult participants shared life experiences with students in a classroom environment.                                                             | Intergenerational program evaluation from participant viewpoint.                                                                             | 84 randomly selected students;<br>Age 13-19 years;<br>26 older people; Age 60 years +; Male and female groups.                                                  | The intergenerational activity based on reminiscence improved social interaction and community wellbeing for older adults.                 | Unclear              | No                     | Focus group interviews followed by thematic analysis                                                                                                                                  |
| <b>Kessler and Staudinger[37]</b> | Quantitative; Laboratory (Germany); Interaction between an Older Person and Younger Person, Two Older People or Two Younger people addressing a "life problem" or a "media problem". | To understand if intergenerational interactions have the potential to facilitate psychological functioning in both adolescent and old age.   | Older women aged 70-74 n=90 and girls aged 14-15 n=90                                                                                                           | Improved cognitive performance, reduced negative age-related stereotypes and triggered generative behaviours.                              | No                   | No                     | Data collected by a series of survey, psychometric and cognitive tests. Analysis completed using planned comparisons                                                                  |
| <b>Hernandez and Gonzalez[46]</b> | Quantitative; Local council social centre (Spain); Weekly recreational activities (talks, excursions, cultural events). 32 interactive session "movement program".                   | To investigate the effect of an intergenerational program on stereotyped attitudes towards elderly people and the wellbeing of older adults. | 101 elderly people; across two groups, age M= 74 (SD=7.7) and M=75 (SD= 5.21); 179 university students; Age M=19 (SD= 0.93); Both male and female participants. | Improved outcomes in depression measures in older adults who participated in an intergenerational exercise group.                          | Yes                  | Yes – adolescents only | Pre and post sessions that included questionnaires and geriatric depression scale. Analysis via repeated measure analysis of variance (ANOVA)                                         |
| <b>Wilson, Cordier[47]</b>        | Qualitative; Men's shed (Australia); 10 week intergenerational mentoring program over with older male mentors offering support to younger at risk males                              | To explore the experiences and perceptions of mentors involved in an occupation skill focussed program with teenage boys.                    | 9 teenage boys; Age ~15 years; 6 older male mentors; Age 60-75; a project facilitator and a youth worker. All participants were male.                           | Intergenerational programs involving older adults with a strong sense of generativity were shown to be a valuable resource to communities. | Yes                  | Yes- both groups       | Pre and post Individual interviews and focus groups with both groups however only reported on data from older adult participants using constant comparative method of grounded theory |

|                               |                                                                                                                                                                                     |                                                                                                                                                                                                 |                                                                                                                                                                                       |                                                                                                                                                      |     |                        |                                                                                                                                                                                                                                                      |
|-------------------------------|-------------------------------------------------------------------------------------------------------------------------------------------------------------------------------------|-------------------------------------------------------------------------------------------------------------------------------------------------------------------------------------------------|---------------------------------------------------------------------------------------------------------------------------------------------------------------------------------------|------------------------------------------------------------------------------------------------------------------------------------------------------|-----|------------------------|------------------------------------------------------------------------------------------------------------------------------------------------------------------------------------------------------------------------------------------------------|
| <b>Biggs and Knox[48]</b>     | Qualitative; Residential care/ assisted living (USA (Texas)); Girl scout meetings held in assisted living facility                                                                  | To identify impact of an intergenerational program for girl scouts (young people) and residents (older people) on quality of life, social interaction and personal attitudes.                   | Focus groups comprised of parents = 8, residents = 5, staff = 10, children (scouts and daisies) 5-12 years = 9; Content essay participants ages 6-16: n= 18; All participants female. | Intergenerational programs using social workers and community volunteers strengthened intergenerational relationships.                               | Yes | No                     | Focus group interviews with both groups and submitted essays from the younger participants followed by hematic analysis                                                                                                                              |
| <b>Knight, Skouteris[35]</b>  | Mixed Methods; Residential aged care setting (Australia); Development of a life story review book by adolescent students partnered with an older adult.                             | To pilot and test the feasibility of an intergenerational program "My Life Story".                                                                                                              | Adolescents n= 24; Age M= 14.56 (SD=0.5); Older adults n= 12; Age M=90.58 (SD=3.59); Gender of participants not stated                                                                | Improved social connectedness and community engagement resulted from an intergenerational program using reminiscence.                                | Yes | Yes- both groups       | Qualitative data collected (post) using semi-structured interviews and quantitative data collected (pre and post) using a series of items followed by thematic analysis and paired t-tests.                                                          |
| <b>Ostensen, Gjevjon[15]</b>  | Qualitative; Residential care facility or private home (Norway) Sessions over a 12-month period with volunteer adolescents supporting older adults to learn use of a tablet device. | To explore a new model of care that supports older people to participate by introducing technology and mobilising volunteer services.                                                           | Older adults n= 15 (5 withdrew due to illness, death and hospitalisation); Adolescents n=not stated; Age 54-94 years; Both male and female participants.                              | Reduction in anxiety and increase in social activity for older adults followed an intergenerational program supporting older adults to use an iPad.  | Yes | Yes- adolescents only  | Individual semi structured interviews repeated over a 12 month period with the older adults only followed by thematic analysis                                                                                                                       |
| <b>Santini, Tombolesi[49]</b> | Qualitative; Residential aged care facility (Italy); Intergenerational activity based meetings with aged care residents, older adult community volunteers and adolescents.          | To understand if creating community space and planning activities where adolescents, older adults, and active older volunteers meet and interact will improve health outcomes for older adults. | 14-year-old students n=25 (18 males and 7 females) and three teachers; 16 older residents; Age M=83; three social workers; 16 older volunteers; Age M=70                              | The intergenerational program improved the wellbeing of institutionalised older adults.                                                              | Yes | Yes- both groups       | Individual and focus groups Interviews with students; individual interview with older adults; focus groups with volunteers before, during and after the intervention followed by content analysis                                                    |
| <b>Wilson, Cordier[33]</b>    | Mixed methods; Men's shed (Australia); Intergenerational mentoring program with older adults and young adults with intellectual disability.                                         | To examine the feasibility of a novel Men's Shed intergenerational mentoring intervention for young adults with intellectual disability.                                                        | 5 mentees (average age 16); Older adult mentors n=12; Age M=69.5 (SD=8.53); All participants were male.                                                                               | Intergenerational mentoring interventions for youth with intellectual disability at community Men's Sheds were shown to be feasible and appropriate. | Yes | Yes- older adults only | Quantitative data via pre-and post-intervention outcome measures and descriptive data of mentees' functional skills. Qualitative data collected at end of project via individual interviews with mentees and mentors. Used realist evaluation method |

The characteristics of the included studies are provided in Table 1. In phase two of the review, data was analysed to 1) confirm the degree to which the a priori theories identified in phase one (see Table 2) were supported and 2) generate the contexts, mechanisms and outcomes from the included interventions.

### Quality Assessment

In line with recommendations for realist reviews[40] no studies were excluded following quality assessment, rather each study was ultimately assessed for its contribution to theory development and context mechanism outcome configurations. The quality assessment of each included study concluded with an overall estimate of how valuable the study was to the review (Low, Medium or High), a criterion based on Question 10 of the Critical Appraisal Skills Programme qualitative quality assessment tool[50]. The assessment concluded that majority of studies (7/9) were found to be of high value to the review[15, 33, 35, 37, 45, 47, 49]. These studies were rated as highly valuable due to the age range of participants fitting directly with the aims of this review and because they reported on intergenerational programs in detail and provided ample evidence to support their findings, facilitating the analytical process for this review. The Biggs et al.[51] and Hernandez and Gomez[46] studies were rated as being of medium value to the review. Biggs et al.[51] was assessed as lacking on detail with regard to the reporting of the findings, whereas Hernandez and Gomez[46] had limited age group relevance to the review aims as the younger age group had an average age of 19.

**Table 2: a priori theories identified after step one**

|                                                                                                                                                                                                             |
|-------------------------------------------------------------------------------------------------------------------------------------------------------------------------------------------------------------|
| Intergenerational programs involving adolescents and older adults improve social connectedness in the older adult group.                                                                                    |
| Intergenerational programs conducted in educational contexts result in positive outcomes in social connectedness for one/both groups.                                                                       |
| Because they are at a similar point in psychosocial development, adolescents and older people are likely to be mutual beneficiaries of intergenerational programs.                                          |
| Intergenerational programs help support meaningful connections for older people who may be socially disconnected within the community, with individuals outside of their normal age and social demographic. |
| Greater generativity is formed through participation in intergenerational programs.                                                                                                                         |
| Intergenerational programs conducted in educational contexts build community connections between generations and across structural community assets like schools.                                           |

When coupled with the *a priori* theories generated from phase one, context mechanism outcome configurations (CMOC) were developed. The CMOC are eight circumstances deemed optimal for the delivery of intergenerational programs involving older adults and adolescents and are hypothesised to improve outcomes in social connectedness. These are summarised in Table 3 below.

**Table 3: Summary of Context Mechanism Outcome Configurations**

| CMOC label and summary-level description                                                                                                                                                                                                                                                                                                                                                                                                                                                                                                                                                                                              | References of included studies |
|---------------------------------------------------------------------------------------------------------------------------------------------------------------------------------------------------------------------------------------------------------------------------------------------------------------------------------------------------------------------------------------------------------------------------------------------------------------------------------------------------------------------------------------------------------------------------------------------------------------------------------------|--------------------------------|
| <p><b>CMOC 1 Understand the participants psychosocial development phase and attitudes towards each other to foster generativity</b></p> <p>Adolescents and older adults are at a similar crossroads in the formation and maintenance of their identity[34] (context). Understanding the developmental phase and held attitudes of the participants (context) supports the design of program training activities (mechanism) and ‘ice breakers’ (mechanisms) that foster reciprocity (mechanism) and are more likely to trigger generativity (outcome) between the generational groups and improve social connectedness (outcome).</p> | All included studies           |
| <p><b>CMOC 2 Use a pedagogic framework to trigger generativity, intercommunity connections and deliver social health outcomes</b></p> <p>Pedagogic frameworks (context) motivate the adolescent to participate in intergenerational programs and achieve a result[35, 45, 48]. Similarly, the older adult is motivated to transfer skills and wisdom and provide support to the adolescent so as they can achieve their goal (mechanism). As a result, social connectedness and attitudes (outcomes) towards the other generational group improve.</p>                                                                                | All included studies           |
| <p><b>CMOC 3 Design the program to be frequent and have a clear structure to support participation and improved social connectedness</b></p> <p>Pedagogic frameworks (context) provide structure. Programs that are co-designed and scheduled frequently allow relationships to form through shared goals and activities (mechanisms). Frequent and carefully structured programs allow for improved social connectedness, and sustainable health and community benefits (outcomes).</p>                                                                                                                                              | All included studies           |
| <p><b>CMOC 4 Conduct the program in community settings to support social health outcomes and build social capital</b></p> <p>Community settings including educational institutions, care homes or existing community groups provide a foundation for engagement (context) when delivering intergenerational programs. Programs that showed a strong connection to the community through their facilitators (mechanism) or the physical environment (mechanism) showed improved sustainability and generalisability for the participants and the broader social capital of the community (outcome).</p>                                | [15, 33, 35, 45-47, 49]        |
| <p><b>CMOC 5 Deliver pre-program training and support participants to ‘break the ice’</b></p> <p>Utilising existing community settings and knowledge of psychosocial development, (contexts), pre-program training (mechanism) and activities that support participants to connect on a more informal level (mechanism) work together to bridge gaps between the generations (outcome).</p>                                                                                                                                                                                                                                           | [15, 33, 35, 45-47, 49]        |
| <p><b>CMOC 6 Identify shared goals between program participants to build reciprocity and support program engagement</b></p> <p>Through use of pedagogic frameworks and existing community links (contexts), the identification of shared goals builds reciprocity (mechanism) between the participants and in turn may trigger benefits including a greater sense of generativity (outcome), improved wellbeing (outcome) and social connectedness (outcome).</p>                                                                                                                                                                     | [15, 33, 35, 45-47, 49]        |
| <p><b>CMOC 7 Include a trained facilitator to promote program participation</b></p>                                                                                                                                                                                                                                                                                                                                                                                                                                                                                                                                                   | [33, 35, 45-47, 49]            |

|                                                                                                                                                                                                                                                                                                                                                                                                                                                                 |                                    |
|-----------------------------------------------------------------------------------------------------------------------------------------------------------------------------------------------------------------------------------------------------------------------------------------------------------------------------------------------------------------------------------------------------------------------------------------------------------------|------------------------------------|
| <p>In a variety of contexts, the inclusion of a program facilitator (mechanism) may support improved social connectedness (outcome). The other key function of a facilitator is to ensure that the participants have had the opportunity to ‘break the ice’ (mechanism) through pre-program training and informal opportunities such as morning tea times.</p>                                                                                                  |                                    |
| <p><b>CMOC 8 Plan inclusive activities that trigger generativity and improve physical, cognitive, psychological and social outcomes</b></p> <p>When programs use existing community connections, include relationship-based activities with a shared goal (mechanisms) and are grounded in a pedagogic framework (contexts), there is improvement in health and social wellbeing (outcome) and a sense of generativity for the older adult group (outcome).</p> | <p>[15, 33, 35, 37, 45-47, 49]</p> |

### **CMOC 1 Understand the participant’s psychosocial development phase and attitudes towards each other to foster generativity and connection**

In the included studies, pre-program psychometric measurement[33, 35, 37, 46], focus groups or interviews[47] and informal gatherings at the beginning of the program[15, 33, 35, 46, 47, 49] were used to understand the demographic and psychosocial characteristics of participants. Psychometric scales that measured attitudes towards ageing, social connectedness, loneliness, generativity and presence of depression were completed pre and post intervention[33, 35, 37, 46]. Pre-program focus groups and interviews were used with both groups[33, 47, 49] to understand participant skills and motivations. This information was used to align participants based on skills and expectations, understand participant relationships with other generations, their attitudes towards ageing and their perceptions of self [49]. Understanding baseline attitudes helped structure programs to promote alternate views of an older person’s capability, foster dialogue and enhance learning between generations.

Evidence from the included studies indicates that using pre-program measures to understand participant demographics, including their psychosocial phase and cognitive and physical abilities leads to a more likely match in participant capability and outcomes that improve social connectedness and generativity.

### **CMOC 2 Use a pedagogic framework to trigger generativity, intercommunity connections and deliver social health outcomes**

Pedagogic or service-learning frameworks support participants to learn together in a real-world context[5, 52] and featured in six of the included studies[33, 35, 46-49]. Studies that involved school students were aged between 13-19 years with 15 years the average age across studies[33, 35, 45, 47, 49]. Two studies[35, 49] involved students completing a report or a community presentation, whilst others involved students completing a small woodwork project[33, 47]. These tasks were curriculum linked[35], motivating adolescent participants to complete the task. Older adults reported they felt needed when they were contributing to adolescent’s learning and

1 acknowledged the adolescent's contribution to their own learning - "*they can teach us the*  
2 *computer and their new language*"[49]  
3  
4

5  
6 Through the use of a pedagogic framework, results showed improved understanding and respect  
7 for the other generation[47, 48] and older adults gained a sense of pride in being able to pass on  
8 their knowledge and wisdom. These findings provide evidence that in pedagogic contexts, where  
9 reciprocity is formed, it is likely that an improvement in perceived social connectedness and  
10 wellbeing will occur for the older adult.  
11  
12  
13

### 14 **CMOC 3 Design the program to be frequent and have a clear structure to support participation** 15 **and improved social connectedness**

#### 16 *Frequency and duration of sessions*

17  
18 Programs that used a pedagogic framework were usually linked to a school term or semester[33,  
19 45-47, 49]. These programs ranged from six to twelve - week blocks, often repeating over school  
20 terms. Programs that were held weekly[15, 33, 35, 46, 47], fortnightly[45, 49] or bi-monthly[48].  
21 Biggs and Knox[48] reported less frequent sessions were chosen to avoid overwhelming the  
22 participants, compared to other participants who requested more frequent and extended  
23 program sessions so they could spend more time together[33, 45, 47, 49].  
24  
25  
26  
27  
28  
29

#### 30 *Structure of sessions*

31  
32 A clear program structure that included pre-training and time for "breaking the ice"[33, 47] was  
33 reported as beneficial. Typically, studies used the session to engage and introduce participants  
34 or complete training and the following weeks to cover different topics or questions relating to  
35 the aim of the study. In the Ostensen[15] study, older adults raised learning goals that formed  
36 the structure for the week ahead. Overall, evidence suggests that having a structured program  
37 that allows frequent interaction between generational participants is more likely to result in  
38 improved social connectedness and optimised health and wellbeing.  
39  
40  
41  
42  
43  
44

### 45 **CMOC 4 Conduct the program in community settings to support social health outcomes and** 46 **build social capital**

47  
48 Intergenerational programs that occur in community settings provide a platform for building social  
49 capital[4, 9, 26]. Four studies conducted programs in residential care facilities using existing  
50 community connections such as local youth clubs and schools that were geographically close by  
51 [15, 35, 48, 49] and two others[33, 46, 47] leveraged local community programs (volunteer  
52 groups). Evidence suggested that community-based programs had greater potential in enhancing  
53 social health outcomes for older adults and generating social capital in the broader community.  
54 In the Biggs and Knox[48] study, older adult participants began attending church with the families  
55 of the adolescents, demonstrating connections beyond the program. Similar results were reported  
56  
57  
58  
59  
60

1  
2 in the de Souza[45] study with older participants reflecting improved mood, physical wellbeing  
3 and a *'feeling of freedom'* (p. 467), through their opportunities to get out of the facility and spend  
4 time with the adolescents in the community. The location, existing relationships between  
5 community organisations and activities that support participants to observe the other generation  
6 playing a role in the community are all positive predictors of a likely improvement in individual  
7 and community social connectedness and wellbeing.  
8  
9

#### 10 11 12 **CMOC 5 Deliver pre-program training and support participants to 'break the ice'**

13 Pre-program training was provided in six of the nine included studies. Training was offered to older  
14 adults and the adolescents[33, 35, 49], to older adults only[33] or to adolescents only[15, 46].  
15 Training included program orientation or the opportunity to learn about the other generation.  
16  
17

18 Where training was provided to both the adolescents and older adults, this appeared to foster  
19 social connections. For example, the adolescents shook the hands of the older gentleman at the  
20 beginning and end of each session. This positive social behaviour was felt by the older men to be  
21 respectful and demonstrated social connectedness between the groups[47]. However, in the  
22 Santini[49] study, despite the pre-program introductory material, students reported that they  
23 required support from teachers and older adult volunteers to overcome their emotions when they  
24 met with the older adults for the first time.  
25  
26

27 The Wilson et al[33] program provided training to the older adult mentors only. This training  
28 provided the mentors with disability awareness training via videos. Despite this, it was highlighted  
29 by the older adults that they would have liked to have been more prepared for working with the  
30 adolescents with intellectual disability. Two studies provided training to adolescents only[15, 46]  
31 however did not report on the impact of this training.  
32  
33

34 In studies where no formal pre-program training was provided, results were mixed in relation to  
35 the impact on the program. In the Kessler and Staudinger[37] study, the randomised control trial  
36 methodology required pre-program blinding. In the Biggs and Knox[48] study, the participants  
37 were already involved in an existing Scouts program, so it is assumed that pre-program education  
38 was included in Scout club activities, however, this was not reported by the authors. Parents of  
39 the adolescents in the Biggs and Knox[48] raised concern about their children's reactions to  
40 residents with dementia or if a resident died. There were also reports from the residents and  
41 parents that boundaries and behaviours were not respected by the adolescent participants. These  
42 examples indicate a role for pre-program training to reduce fears and provide education. Where  
43 training or opportunities to interact were sub-optimal or missing, participants highlighted limited  
44 opportunities to 'get to know' each other or feel prepared for the program[33, 45]. If comfort or  
45 confidence in the program is not established, participants may not participate[45] or be reluctant  
46  
47  
48  
49  
50  
51  
52  
53  
54  
55  
56  
57  
58  
59  
60



1  
2 to participate again[33]. This has broader implications for the sustainability of program outcomes,  
3 particularly those that aim to enhance social capital or galvanise links between community groups.  
4

5  
6 **CMOC 6 Identify shared goals between program participants to build reciprocity and support**  
7 **program engagement**  
8

9 By understanding the shared aims of participants, reciprocity is nurtured, participants are more  
10 motivated, and generativity is triggered. Where participants were involved in program design[46,  
11 49] as well as iteratively throughout the course of the program[15, 48] the program was more  
12 person centred, enhanced reciprocal behaviours and improved outcomes.  
13  
14

15  
16 The Santini[49] study used an action participatory research approach with active older adult  
17 volunteers, social workers and teachers and Hernandez and Gonzalez[46] used a co-design  
18 approach through adolescent students designing an exercise program for older adults that was  
19 delivered with support from lecturers and trained facilitators over 32 sessions. Both generations  
20 benefited in these programs, with results indicating a positive shift in age related stereotypes  
21 when older adults and adolescents interacted as part of the program.  
22  
23

24  
25 In programs where there was a shared goal from the outset there was greater improvement in  
26 social connectedness[33, 35, 47, 48], reduced markers for depression[46] and stereotypical  
27 attitudes towards the older generation[48]. The included studies demonstrate that creating  
28 reciprocity drives generative behaviour. Reciprocity and generativity combined leads to improved  
29 social connectedness and health and wellbeing outcomes for the individual and the community  
30 broadly.  
31  
32

33  
34 **CMOC 7 Include a trained facilitator to promote participation**  
35  
36

37  
38 Facilitation is the act of supporting and enabling a group to meet its objectives (and release its full  
39 potential) by fostering conditions that respects and encourages contributions by all members of  
40 the group[53]. Facilitation was used in seven of the included studies. The facilitators were trained  
41 professionals including teachers[35, 49], university staff[46], fitness instructors[46], health  
42 professionals[15, 33, 48], community leaders[48] and youth workers[47]. In the Santini[49] study,  
43 active older volunteers also played a facilitation role. Studies that included a facilitator resulted in  
44 greater participant interaction and improved program outcomes[33, 47, 49]. In the Wilson et al  
45 study, the youth worker that facilitated the program was described as responsible for “*keeping us*  
46 *on track*”[47] and was pivotal in prompting participation between the groups, for example at  
47 afternoon tea breaks.  
48  
49

50  
51 In the study involving girl Scout groups[48], the troop leaders were trained social workers. Whilst  
52 their individual experiences were not reported in the findings, the role they played in bringing  
53 together individuals connected to existing community settings in girl Scouts, residential aged care  
54  
55  
56  
57  
58  
59  
60

1 and volunteer groups was fundamental in the program longevity and results. In four studies, active  
2 adult[33, 47, 49] and adolescent[15] volunteers were recruited from local community volunteer  
3 groups and provided additional program facilitation support that likely enhanced positive  
4 outcomes in community engagement and social connectedness.  
5  
6  
7

8  
9 Conversely, in studies where the facilitation was reported as being sub-optimal[33] or absent[45],  
10 the participants and the authors highlighted that greater support from the teachers, researchers  
11 or 'monitors' would have enhanced interactions between the generational groups. If facilitation  
12 is absent or lacking, participants may feel frustrated or unsupported, in turn causing participant  
13 disengagement, attrition or an unintended triggering of age-based stereotypes or perceived  
14 loneliness[49]. Trained facilitation supports improved connectedness between participants and  
15 when delivered within community and pedagogic contexts, favourable outcomes in generativity,  
16 social connectedness, and social capital.  
17  
18  
19  
20  
21  
22

### 23 **CMOC 8 Plan inclusive activities that trigger generativity and improve physical, cognitive,** 24 **psychosocial, and social outcomes**

25  
26 Included studies reported on programs that provided relationship-based inclusion[35, 45, 48, 49]  
27 and activity-based inclusion[15, 33, 46, 47] opportunities for participants.  
28  
29  
30

31 Relationship-based inclusion:

32 If there is limited opportunity for relationship-based inclusion, adolescents and older adults are  
33 at risk of not experiencing meaningful social connection[35]. Feeling included by peers and the  
34 broader community promotes generativity and in turn improves wellbeing in both age  
35 groups[23, 35]. Several programs[35, 45, 48, 49] used relationship- based inclusion activities  
36 such as reminiscence (sharing old photos or learning about what jobs older people used to do) to  
37 create reciprocity between older adults and adolescents. This was also a mechanism to improve  
38 physical, cognitive, and psychological health, and in turn social connectedness. A marker of  
39 sustained relationships was demonstrated by the adolescents continuing to connect with older  
40 adults after the program[35, 49], including volunteering at a local community organisation with  
41 older people.  
42  
43  
44  
45  
46  
47  
48  
49

50 Activity-based inclusion:

51 Studies that used activity-based inclusion such as exercise programs[46], digital literacy training  
52 with an iPad[15] or woodwork construction[33, 47] also reported improved outcomes in  
53 physical, cognitive, psychological and social domains, including social connectedness. In the  
54 studies set in Men's Shed's the young adults were mentored by the older men in occupational  
55 activities, with both groups reporting the activities provided the opportunity to connect, whilst  
56 learning new skills and doing "*something with our hands*"[47]. Young adults with intellectual  
57  
58  
59  
60

1 disability commented that the Men's Shed was a unique learning environment - "*they made me*  
2 *feel like part of the group*" and that they "*felt accepted*"[33]. Older adults supported to use a  
3 tablet device[15] demonstrated improved social outcomes as they were able to connect with  
4 family in other locations or the outside community through news applications or by tracking  
5 weather. Nurses in the care facility reported a change in social behaviour in the participants  
6 using iPads, taking more initiative, presenting as less anxious and being more socially active. In  
7 the Hernandez and Gonzalez[46] study, the interaction between adolescents and older people  
8 showed statistically significant improvement in depression scores and stereotypical attitudes in  
9 the older adult group. A comparison group led by the adult trainer resulted in a less significant  
10 change in depression scores in the older adults (Group 1 with adolescents=  $p < .001$ ; Group 2 led  
11 by adult trainer =  $p < .008$ ). The control group (who attended the local social centre but did not  
12 interact with the adolescents or participate in exercise sessions) showed a statistically significant  
13 increase in depressive symptoms ( $p < .001$ ). The evidence supports activities that provide the  
14 participating generations with the opportunity to share time, reminisce and develop  
15 relationships are powerful mechanisms for triggering generativity and social connectedness.  
16  
17  
18  
19  
20  
21  
22  
23  
24  
25  
26  
27

### 28 **Logic model**

29 The aim of this review is to identify the circumstances in which social connectedness is optimised  
30 for older adults when taking part in intergenerational interventions with adolescents. The logic  
31 model below represents the relationships between program activities and improved social  
32 connectedness for older adults. As demonstrated through the CMOC, the act of two generations  
33 coming together in familiar community-based contexts with a shared purpose, resulted in  
34 strengthened relationships and community connections. Several participants in the included  
35 studies spoke about the benefit of having an opportunity to 'meet and greet' for example by  
36 sharing an afternoon tea as part of the program[33, 35, 47-49].  
37  
38  
39  
40  
41  
42

43 This logic model (presented in Figure 2 below) uses a nested visual to represent an optimal  
44 intergenerational program to improve social connectedness in older adults. The circumstances  
45 being the outer circle, with the mechanisms within that, driving the outcomes at the core.  
46  
47  
48  
49  
50  
51  
52  
53  
54  
55  
56  
57  
58  
59  
60

1  
2  
3  
4  
5  
6  
7  
8  
9  
10  
11  
12  
13  
14  
15  
16  
17  
18  
19  
20  
21  
22  
23  
24  
25  
26  
27  
28  
29  
30  
31  
32  
33  
34  
35  
36  
37  
38  
39  
40  
41  
42  
43  
44  
45  
46

**\*Insert here\_Figure 2: Logic model**

For peer review only

## DISCUSSION

Evidence from the included studies reveals how intergenerational programs involving adolescents can address issues of social disconnectedness in older adults. This review identifies how and why intergenerational programs work, for whom and in what circumstances. Broadly, the CMOC cover four main themes - 1) psychosocial and mental health, 2) physical and cognitive health, 3) program design and structure and 4) community engagement and social capital.

### **Psychosocial and mental health**

Providing opportunities for older adults to participate, without being infantilized or inequitably treated is highlighted by the included studies and others as a mechanism for improving reciprocity and generativity[20, 37, 54]. The opportunity to participate in an intergenerational program saw older adults improve their own self-image and stereotypical view of old age and prove to themselves that they still had something to offer the community and the younger generation[45, 46, 49]. Included programs that created opportunities for informal, relationship-based activities which triggered generativity, for example promoting conversation between the generational groups, were of greatest benefit to psycho-social health[35, 45, 49].

### **Physical and cognitive health**

The impact of intergenerational programs on broader health outcomes, including cognitive health has been previously reported[14, 55]. The connections between social, cognitive and physical health are well known, particularly in high-risk populations like older adults[56-58]. In this review, interventions that promoted the older adult as wise or expert[33, 35, 37, 47, 48] showed improvement in both perceived and measured cognitive performance. Kessler and Staudinger[37] showed improvement in speed of processing and word fluency when older adults were paired with an adolescent and asked to solve a 'life problem'. Qualitative evidence from included studies reported improved physical health in older adults as a result of their involvement in the intergenerational program, including increased energy[33] reduced pain[49] and increased movement[45].

### **Program design and structure**

A range of designs and structures are reported in the intergenerational program literature. Intergenerational programs embedded within pedagogic contexts are supported by existing literature[26, 59, 60] and were featured in many of the included studies. Several studies support the need for in depth, sustainable and accessible intergenerational programs to address social health issues[19, 61]. As highlighted by Cattani et al.,[62] programs that engage adults in the planning and design of the interaction are most effective. This was seen in the Ostensen[15] study and the Wilson et al.,[33] study that highlighted the use of co-design to optimise outcomes.

1  
2  
3  
4  
5  
6  
7  
8  
9  
10  
11  
12  
13  
14  
15  
16  
17  
18  
19  
20  
21  
22  
23  
24  
25  
26  
27  
28  
29  
30  
31  
32  
33  
34  
35  
36  
37  
38  
39  
40  
41  
42  
43  
44  
45  
46  
47  
48  
49  
50  
51  
52  
53  
54  
55  
56  
57  
58  
59  
60

Martins et al.,[31] in a review of intergenerational programs also highlighted the benefit of weekly or fortnightly intergenerational meetings to create bonds between participants.

Several of the included studies highlighted the importance of informal and formal program structures to build a foundation for connection. Several interventions leveraged existing local community connections and pre – program training was shown to support participation[33, 45, 49]. However, where complex demographics exist, additional program support may be required[33, 45, 49].

### **Community engagement and social capital**

Programs set in the community that leveraged existing community connections were more likely to promote social connectedness. Individuals already engaged with the community in a volunteer capacity were participants, and in some cases facilitators of the program. Other reviews[21] support the inclusion of volunteers as it is a cost effective way to deliver programs and promote volunteerism- a key element for enhancing social capital. Volunteers were used in the included studies to support program delivery and participant recruitment via community organisations like Rotary or Scouts[15, 33, 47-49]. Adolescents also witnessed volunteer ‘models’ and were interested in volunteerism beyond the program[15, 35, 49].

### **Strengths and limitations of this review**

This realist review explored intergenerational programs that specifically involved adolescents and their impact on social connectedness in older adults and developed inclusion and exclusion criteria to reflect this aim. Whilst these criteria generated a targeted group of studies for review, there may have been additional studies missed. The included studies showed some collective limitations including a lack of participant diversity in regard to gender and rurality. From the information reported, most studies were conducted in metropolitan environments. The importance of building capacity in rural communities to protect the social health of older adults is supported by Hodgkin et al.[6] and this lacking insight is one limitation of this review. In regards to gender, three studies specifically recruited based on gender given they were located in Men’s sheds[33, 47] or focused on girls scouts[48], however in other studies where gender did not appear to be a structural factor, there was a greater proportion of women over men who participated. This is a possible limitation of the review along with the limited participation of older adults with cognitive impairment, particularly in quantitative measurement[15, 35, 48]. There were also noted limitations in the quality of some studies with a paucity of evidence from the intervention, however these studies remained included in the review given their value to the overall review question and the commitment in realist methodology not to exclude solely based on quality of evidence[38].

1  
2 This review is however strengthened by its specific focus and that it is the first realist review to  
3 explore the impact of intergenerational programs specifically involving adolescents on social  
4 connectedness in older adults. In addition, the review included a variety of study methods  
5 including one randomised control trial. The inclusion of evidence developed using a variety of  
6 methods is supported by the realist review methodological standards as it provides a broad view  
7 of existing literature and evidence is included based on its value and contribution to the review  
8 aim, rather than singularly on methodological type. As a result, the included studies report on a  
9 variety of different programs from several major continents. Whilst this heterogeneity may be  
10 viewed as a limitation, the realist method supports using a wide range of evidence to  
11 understand the circumstances in which complex interventions deliver an intended outcome. The  
12 review may have been further strengthened by the opportunity to test the program theories and  
13 logic with stakeholder groups.  
14  
15  
16  
17  
18  
19  
20  
21  
22

### 23 **Implications for practice and future research**

24 This review has provided a logic model that is ready to use by clinicians, program managers and  
25 policy makers in the design and implementation of community based intergenerational  
26 interventions. This review has implications for targeting physical, social, and mental health in older  
27 adults, as well as exploring opportunities for the role of intergenerational programs in adolescent  
28 health. Furthermore, the program theory provides a suggested approach for designing programs  
29 with a broader system lens. Previous literature has also supported the use of intergenerational  
30 programs[63], in particular those with a social health focus, to counter loneliness[64], influence  
31 age related health outcomes[17] and reduce costs associated with increased care needs in older  
32 age[15, 65].  
33  
34  
35  
36  
37  
38  
39

40 The review also provides support for the inclusion of intergenerational programs into the  
41 curriculum to influence adolescent career choices and to improve attitudes towards older  
42 people[35, 45, 49]. Included studies also called for intergenerational programs to be a “systematic  
43 component of care provision”[49] for older adults living in residential aged care, including  
44 additional resources, changes to models of care and staff training[15].  
45  
46  
47  
48

49 Future research where intergenerational interventions are 1) designed using the program theory  
50 as articulated within the logic model and 2) tested with stakeholders, may support further  
51 understanding what works for whom, and in what circumstances. Realist evaluation or other  
52 published frameworks like the 6-SQUID model[66, 67] are methodological options for future  
53 projects. This style of participatory research generates community will and engagement and  
54 supports sustainability without major resource investment, as the community itself ‘owns’ and is  
55 committed to the intervention they have designed. Future research would also benefit from  
56  
57  
58  
59  
60

1  
2 addressing the same theory in comparative or specific settings[39], such as in aged care settings  
3  
4 or community groups like Men's sheds.  
5

## 6 **CONCLUSION**

7  
8 This review has identified the circumstances in which social connectedness is optimised for older  
9  
10 adults when taking part in intergenerational interventions with adolescents. Findings have  
11  
12 provided a logic model outlining how intergenerational programs involving adolescents are likely  
13  
14 to improve social connectedness for older adults and builds on the evidence that social  
15  
16 connectedness and social networks are protective for immunity, reduced depression rates and a  
17  
18 reduced risk of frailty[16, 56, 68].

19  
20 In addition to the psychosocial development theory, this review has uncovered the optimal  
21  
22 circumstances that promote social connectedness for older adults. These include setting programs  
23  
24 in the community, including a trained facilitator, leveraging a pedagogic framework and finding  
25  
26 shared goals between participants. Structural elements such as pre-program training and  
27  
28 frequency of sessions was shown to be important in delivering relationship bonds between older  
29  
30 adults and adolescents, that trigger generative behaviours and greater perceived social  
31  
32 connectedness. Intergenerational programs involving adolescents are a possible solution for  
33  
34 enhancing social connectedness and health outcomes for older adults.  
35  
36  
37  
38  
39  
40  
41  
42  
43  
44  
45  
46  
47  
48  
49  
50  
51  
52  
53  
54  
55  
56  
57  
58  
59  
60



**Authors' contributions**

JS, HV and DA conceived of the project and contributed to the development of the manuscript. JS led the review, HV and DA were the co-reviewers. HV and DA supervised the work and provided guidance in the support of realist methodology. All authors read and approved the final manuscript.

**Conflict of interest declaration**

The authors declare no conflict of interest and take sole responsibility for the content of this article.

**Data sharing statement**

All included articles are available publicly. The data extracted from these articles can be made available upon request.

**Funding**

This research was undertaken in part fulfilment of a Master of Public Health degree by JS and did not receive any specific funding.

**Ethics Approval**

This study did not require ethical approval

**Acknowledgments**

We would like to acknowledge support from the La Trobe University library staff in conducting initial literature search. We would also like to thank the stakeholders who gave their time to participate in the early stages of this review.

## REFERENCES

1. Grenade L, Boldy D. Social isolation and loneliness among older people: issues and future challenges in community and residential settings. *Australian Health Review*. 2008;32(3):468-78.
2. White H, McConnell E, Clipp E, et al. A randomized controlled trial of the psychosocial impact of providing internet training and access to older adults. *Aging & mental health*. 2002;6(3):213-21.
3. Morton TA, Wilson N, Haslam C, et al. Activating and Guiding the Engagement of Seniors With Online Social Networking: Experimental Findings From the AGES 2.0 Project. *Journal of Aging and Health*. 2018;30(1):27-51.
4. Haslam C. *The New Psychology of Health : Unlocking the Social Cure*. Jetten J, Cruwys T, Dingle G, Haslam A, Haslam C, editors: Florence : Routledge; 2018.
5. Andreoletti C, Howard JL. Bridging the generation gap: Intergenerational service-learning benefits young and old. *Gerontology and Geriatrics Education*. 2018;39(1):46-60.
6. Hodgkin SP, Warburton J, Hancock S. Predicting wellness among rural older Australians: a cross-sectional study. *Rural and remote health*. 2018;18(3):4547.
7. Mellor D, Firth L, Moore K. Can the Internet Improve the Well-being of the Elderly? *Ageing International*. 2008;32(1):25-42.
8. Nycyk M, Redsell M. Intergenerational Relationships and Community Computer Training: Overcoming the Digital Divide. *Journal of Intergenerational Relationships*. 2011;9(1):85-9.
9. Coll-Planas L, Nyqvist F, Puig T, et al. Social capital interventions targeting older people and their impact on health: a systematic review. *J Epidemiol Community Health*. 2017;71(7):663-72.
10. Kaplan M, Sanchez M, Hoffman J. Intergenerational Strategies for Sustaining Strong Communities. *Intergenerational Pathways to a Sustainable Society*. Cham: Springer International Publishing; 2017. p. 109-39.
11. Dickens AP, Richards SH, Greaves CJ, et al. Interventions targeting social isolation in older people: a systematic review. *BMC Public Health*. 2011;11(1):647.
12. Hagan R, Manktelow R, Taylor BJ, et al. Reducing loneliness amongst older people: a systematic search and narrative review. *Aging Ment Health*. 2014;18(6):683-93.
13. Choi M, Kong S, Jung D. Computer and internet interventions for loneliness and depression in older adults: a meta-analysis. *Healthcare informatics research*. 2012;18(3):191.
14. Ronzi S, Orton L, Pope D, et al. What is the impact on health and wellbeing of interventions that foster respect and social inclusion in community-residing older adults? A systematic review of quantitative and qualitative studies. *Syst*. 2018;7(1):26.
15. Ostensen E, Gjevjon ER, Oderud T, et al. Introducing Technology for Thriving in Residential Long-Term Care. *J Nurs Scholarsh*. 2017;49(1):44-53.
16. Berkman LF, Glass T, Brissette I, et al. From social integration to health: Durkheim in the new millennium. *Social science & medicine (1982)*. 2000;51(6):843-57.
17. Glass TA, De Leon CFM, Bassuk SS, et al. Social Engagement and Depressive Symptoms in Late Life: Longitudinal Findings. *Journal of aging and health*. 2006;18(4):604-28.
18. Buffel T, Phillipson C. Can global cities be 'age-friendly cities'? *Urban development and ageing populations*. *Cities*. 2016;55:94-100.
19. Gualano MR, Voglino G, Bert F, et al. The impact of intergenerational programs on children and older adults: a review. *International Psychogeriatrics*. 2018;30(4):451-68.
20. Bagnasco A, Hayter M, Rossi S, et al. Experiences of participating in intergenerational interventions in older people's care settings: A systematic review and meta-synthesis of qualitative literature. *J Adv Nurs*. 2020;76(1):22-33.
21. Springate I, Atkinson, M., & Martin, K. *Intergenerational Practice: a Review of the Literature*. 2008.
22. Gamliel T, Gabay N. Knowledge Exchange, Social Interactions, and Empowerment in an Intergenerational Technology Program at School. *Educational Gerontology*. 2014;40(8):597-617.

23. Kaplan M. The benefits of intergenerational community service projects: Implications for promoting intergenerational unity, community activism, and cultural. *Journal of Gerontological Social Work*. 1997;27(3):211-28.
24. Newman S, Hatton-Yeo A. Intergenerational learning and the contributions of older people. *Ageing horizons*. 2008;8(10):31-9.
25. Schroeder K, Ratcliffe SJ, Perez A, et al. Dance for Health: An Intergenerational Program to Increase Access to Physical Activity. *Journal of Pediatric Nursing*. 2017;37:29-34.
26. Kaplan MS. Intergenerational programs in schools: Considerations of form and function. *International Review of Education*. 2002;48(5):305-34.
27. Leedahl SN, Brasher MS, Estus E, et al. Implementing an interdisciplinary intergenerational program using the Cyber Seniors® reverse mentoring model within higher education. *Gerontology & geriatrics education*. 2018:1-19.
28. Breck BM, Dennis CB, Leedahl SN. Implementing reverse mentoring to address social isolation among older adults. *Journal of Gerontological Social Work*. 2018:1-13.
29. Zhong S, Lee C, Foster MJ, et al. Intergenerational communities: A systematic literature review of intergenerational interactions and older adults' health-related outcomes. *Social science & medicine*. 2020;264:113374.
30. Giraudeau C, Bailly N. Intergenerational programs: What can school-age children and older people expect from them? A systematic review. *European Journal of Ageing*. 2019:1-14.
31. Martins T, Midão L, Martinez Veiga S, et al. Intergenerational programs review: Study design and characteristics of intervention, outcomes, and effectiveness. *Journal of Intergenerational Relationships*. 2019;17(1):93-109.
32. Phang JK, Kwan YH, Yoon S, et al. Digital Intergenerational Program to Reduce Loneliness and Social Isolation Among Older Adults: Realist Review. *JMIR aging*. 2023;6(1):e39848.
33. Wilson NJ, Cordier R, Ciccarelli M, et al. Intergenerational mentoring at Men's Sheds: A feasibility study. *J Appl Res Intellect Disabil*. 2018;31(1):e105-e17.
34. Erikson EH. *Childhood and society*. Rev. ed.. ed. London: London Vintage; 1995.
35. Knight T, Skouteris H, Townsend M, et al. The act of giving: a pilot and feasibility study of the My Life Story programme designed to foster positive mental health and well-being in adolescents and older adults. *International Journal of Adolescence and Youth*. 2017;22(2):165-78.
36. Zacher H, Esser L, Bohlmann C, et al. Age, social identity and identification, and work outcomes: a conceptual model, literature review, and future research directions. *Work, Aging and Retirement*. 2019;5(1):24-43.
37. Kessler E, Staudinger UM. Intergenerational potential: effects of social interaction between older adults and adolescents. *Psychology & Aging*. 2007;22(4):690-704.
38. Wong G, Greenhalgh T, Westhorp G, et al. RAMESES publication standards: realist syntheses. *BMC Med*. 2013;11(1):21.
39. Pawson R, Greenhalgh T, Harvey G, et al. Realist review--a new method of systematic review designed for complex policy interventions. *Journal of health services research & policy*. 2005;10 Suppl 1:21.
40. Pawson R. *Evidence-based policy: a realist perspective*: sage; 2006.
41. Rycroft-Malone J, McCormack B, Hutchinson A, et al. Realist synthesis: illustrating the method for implementation research. *Implement Sci*. 2012;7(1):33.
42. Wong G, Westhorp G, Manzano A, et al. RAMESES II reporting standards for realist evaluations.(Report). *BMC Med*. 2016;14(1).
43. Long A. Evaluative tool for mixed method studies. University of Leeds, School of Healthcare[online]. 2005;24:2017.
44. Critical Appraisal Skills Programme (CASP). *CASP qualitative checklists* [online]. 2018.
45. de Souza EM. Intergenerational interaction in health promotion: a qualitative study in Brazil. *Rev Saude Publica*. 2003;37(4):463-9.

- 1
- 2
- 3
- 4 46. Hernandez CR, Gonzalez MZ. Effects of intergenerational interaction on aging. *Educational Gerontology*. 2008;34(4):292-305.
- 5
- 6 47. Wilson NJ, Cordier R, Wilson Whatley L. Older male mentors' perceptions of a Men's Shed intergenerational mentoring program. *Australian Occupational Therapy Journal*. 2013;60(6):416-26.
- 7
- 8 48. Biggs MJG, Knox KS. Lessons Learned from an Intergenerational Volunteer Program: A Case Study of a Shared-Site Model. *Journal of Intergenerational Relationships*. 2014;12(1):54-68.
- 9
- 10 49. Santini S, Tombolesi V, Baschiera B, et al. Intergenerational Programs Involving Adolescents, Institutionalized Elderly, and Older Volunteers: Results from a Pilot Research-Action in Italy. *BioMed Research International*. 2018:1-14.
- 11
- 12
- 13 50. Programme CAS. CASP qualitative checklist. 2018.
- 14
- 15 51. Biggs S, Lowenstein A. Generational intelligence a critical approach to age relations 2013. 1-181 p.
- 16
- 17 52. Kaplan MS. School-based intergenerational programs: Citeseer; 2001.
- 18 53. Affairs IoC. What is facilitation? 2019 [cited 2022 October]. Available from: <https://ica-uk.org.uk/what-we-mean-by-facilitation/>.
- 19
- 20 54. Salari SM. Intergenerational partnerships in adult day centers: Importance of age-appropriate environments and behaviors. *The Gerontologist*. 2002;42(3):321-33.
- 21
- 22 55. Harris PB, Caporella CA. An Intergenerational Choir Formed to Lessen Alzheimer's Disease Stigma in College Students and Decrease the Social Isolation of People With Alzheimer's Disease and Their Family Members: A Pilot Study. *American Journal of Alzheimer's Disease & Other Dementias*. 2014;29(3):270-81.
- 23
- 24
- 25
- 26 56. Feng Z, Lugtenberg M, Franse C, et al. Risk factors and protective factors associated with incident or increase of frailty among community-dwelling older adults: A systematic review of longitudinal studies. *PLoS ONE*. 2017;12(6):e0178383.
- 27
- 28
- 29
- 30 57. Gleibs IH, Haslam C, Haslam SA, et al. Water clubs in residential care: Is it the water or the club that enhances health and well-being? *Psychology & health*. 2011;26(10):1361-77.
- 31
- 32 58. Sakurai R, Yasunaga M, Murayama Y, et al. Long-term effects of an intergenerational program on functional capacity in older adults: Results from a seven-year follow-up of the REPRINTS study. *Archives of Gerontology and Geriatrics*. 2016;64:13-20.
- 33
- 34
- 35
- 36 59. Whitehouse P, Bendezu E, Fallcreek S, et al. Intergenerational community schools: a new practice for a new time. *Educational Gerontology*. 2000;26(8):761-70.
- 37
- 38 60. Dauenhauer J, Steitz DW, Cochran LJ. Fostering a new model of multigenerational learning: Older adult perspectives, community partners, and higher education. *Educational Gerontology*. 2016;42(7):483-96.
- 39
- 40
- 41 61. Murayama Y, Murayama H, Hasebe M, et al. The impact of intergenerational programs on social capital in Japan: a randomized population-based cross-sectional study. *BMC Public Health*. 2019;19(1):1-9.
- 42
- 43
- 44 62. Cattan M, White M, Bond J, et al. Preventing social isolation and loneliness among older people: a systematic review of health promotion interventions. *Ageing and Society*. 2005;25(01):41-67.
- 45
- 46
- 47
- 48 63. Radford K, Gould R, Vecchio N, et al. Unpacking intergenerational (IG) programs for policy implications: A systematic review of the literature. *Journal of Intergenerational Relationships*. 2018;16(3):302-29.
- 49
- 50
- 51 64. Price B. Approaches to counter loneliness and social isolation. *Nursing Older People*. 2015;27(7):31-9.
- 52
- 53
- 54 65. Ferguson L. Tackling loneliness in older age – why we need action by all ages. *Quality in Ageing & Older Adults*. 2012;13(4):264-9.
- 55
- 56 66. Belford M, Robertson T, Jepson R. Using evaluability assessment to assess local community development health programmes: a Scottish case-study. *BMC Medical Research Methodology*. 2017;17(1):70.
- 57
- 58
- 59
- 60

- 67. Hartley JE, McAteer J, Doi L, et al. CARE: The development of an intervention for kinship carers with teenage children. *Qualitative Social Work*. 2018;1473325018783823.
- 68. Soysal P, Veronese N, Thompson T, et al. Relationship between depression and frailty in older adults: A systematic review and meta-analysis. *Ageing Res Rev*. 2017;36:78-87.

For peer review only

1  
2  
3  
4  
5  
6  
7  
8  
9  
10  
11  
12  
13  
14  
15  
16  
17  
18  
19  
20  
21  
22  
23  
24  
25  
26  
27  
28  
29  
30  
31  
32  
33  
34  
35  
36  
37  
38  
39  
40  
41  
42  
43  
44  
45  
46  
47  
48  
49  
50  
51  
52  
53  
54  
55  
56  
57  
58  
59  
60

Figure 1: Flow diagram

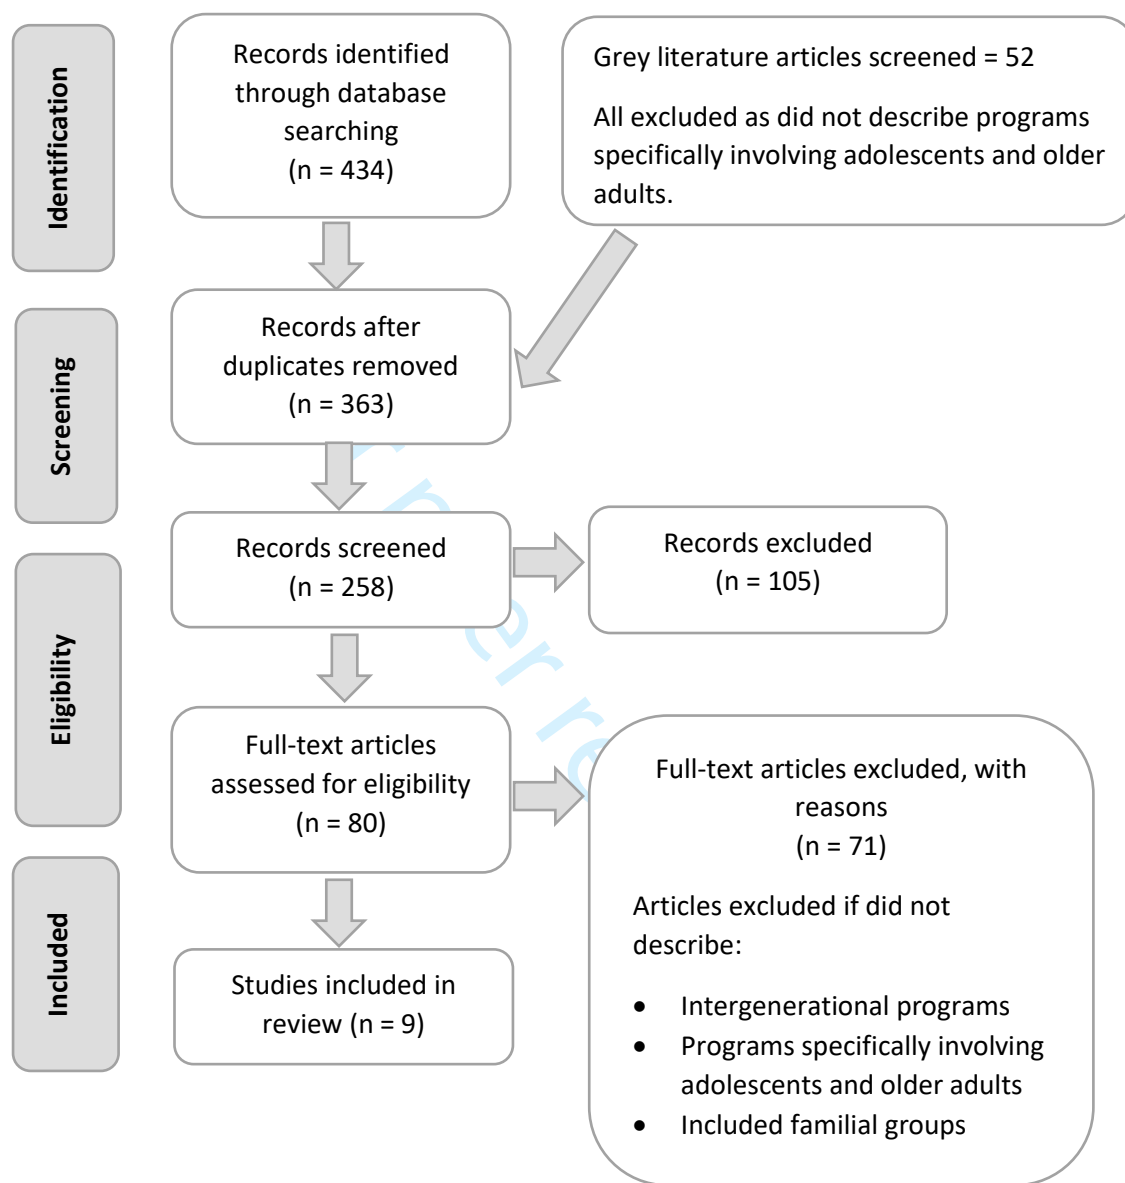

1  
2  
3  
4  
5  
6  
7  
8  
9  
10  
11  
12  
13  
14  
15  
16  
17  
18  
19  
20  
21  
22  
23  
24  
25  
26  
27  
28  
29  
30  
31  
32  
33  
34  
35  
36  
37  
38  
39  
40  
41  
42  
43  
44  
45  
46

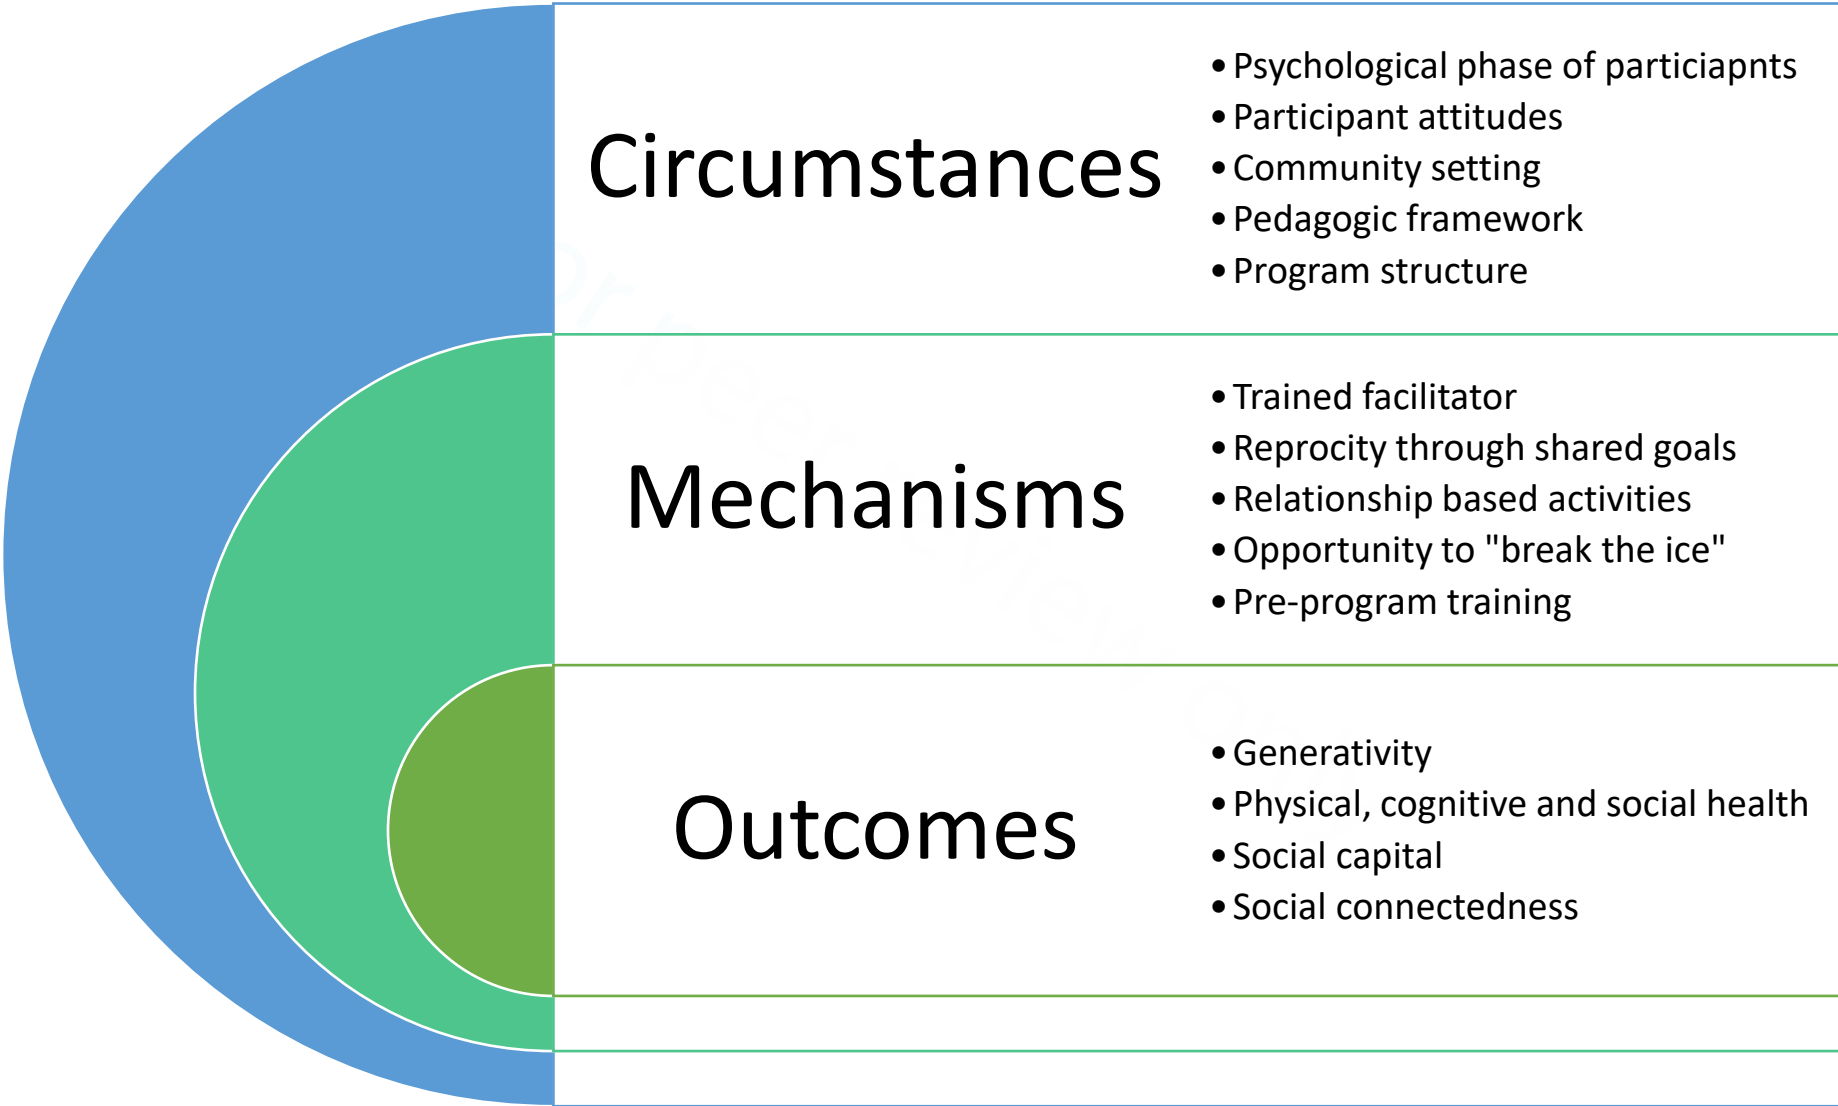

1  
2  
3  
4  
5  
6  
7  
8  
9  
10  
11  
12  
13  
14  
15  
16  
17  
18  
19  
20  
21  
22  
23  
24  
25  
26  
27  
28  
29  
30  
31  
32  
33  
34  
35  
36  
37  
38  
39  
40  
41  
42  
43  
44  
45  
46

For peer review only



## RAMESES checklist for reporting a realist synthesis

From Wong et al.: RAMESES publication standards: realist syntheses. BMC Medicine 2013 11:21. doi: 10.1186/1741-7015-11-21

<https://bmcmecine.biomedcentral.com/articles/10.1186/1741-7015-11-21>

| TITLE        |                                       |                                                                                                                                                                                                                                                                                                                                                                                                                       | Reported in document<br>Y/N/Unclear | Page number |
|--------------|---------------------------------------|-----------------------------------------------------------------------------------------------------------------------------------------------------------------------------------------------------------------------------------------------------------------------------------------------------------------------------------------------------------------------------------------------------------------------|-------------------------------------|-------------|
|              |                                       | In the title, identify the document as a realist synthesis or review                                                                                                                                                                                                                                                                                                                                                  | Y                                   | 1           |
| ABSTRACT     |                                       |                                                                                                                                                                                                                                                                                                                                                                                                                       |                                     |             |
|              |                                       | While acknowledging publication requirements and house style, abstracts should ideally contain brief details of: the study's background, review question or objectives; search strategy; methods of selection, appraisal, analysis and synthesis of sources; main results; and implications for practice.                                                                                                             | Y                                   | 2           |
| INTRODUCTION |                                       |                                                                                                                                                                                                                                                                                                                                                                                                                       |                                     |             |
|              | Rationale for review                  | Explain why the review is needed and what it is likely to contribute to existing understanding of the topic area.                                                                                                                                                                                                                                                                                                     | Y                                   | 6           |
|              | Objectives and focus of review        | State the objective(s) of the review and/or the review question(s). Define and provide a rationale for the focus of the review.                                                                                                                                                                                                                                                                                       | Y                                   | 6           |
|              | Ethical approval                      | State whether the project required and obtained ethical approval from the relevant authorities, with details.                                                                                                                                                                                                                                                                                                         | Y                                   | 10          |
| METHODS      |                                       |                                                                                                                                                                                                                                                                                                                                                                                                                       |                                     |             |
|              | Changes in the review process         | Any changes made to the review process that was initially planned should be briefly described and justified.                                                                                                                                                                                                                                                                                                          | N (no changes made)                 | n/a         |
|              | Rationale for using realist synthesis | Explain why realist synthesis was considered the most appropriate method to use.                                                                                                                                                                                                                                                                                                                                      | Y                                   | 6 to 7      |
|              | Scoping the literature                | Describe and justify the initial process of exploratory scoping of the literature.                                                                                                                                                                                                                                                                                                                                    | Y                                   | 7           |
|              | Searching processes                   | While considering specific requirements of the journal or other publication outlet, state and provide a rationale for how the iterative searching was done. Provide details on all the sources accessed for information in the review. Where searching in electronic databases has taken place, the details should include, for example, name of database, search terms, dates of coverage and date last searched. If | Y                                   | 9           |

|                   |                                                       |                                                                                                                                                                                                                                                                                                                                                                                         |   |               |
|-------------------|-------------------------------------------------------|-----------------------------------------------------------------------------------------------------------------------------------------------------------------------------------------------------------------------------------------------------------------------------------------------------------------------------------------------------------------------------------------|---|---------------|
|                   |                                                       | individuals familiar with the relevant literature and/or topic area were contacted, indicate how they were identified and selected.                                                                                                                                                                                                                                                     |   |               |
| 9                 | Selection and appraisal of documents                  | Explain how judgements were made about including and excluding data from documents, and justify these.                                                                                                                                                                                                                                                                                  | Y | 8 to 9        |
| 10                | Data extraction                                       | Describe and explain which data or information were extracted from the included documents and justify this selection.                                                                                                                                                                                                                                                                   | Y | 6             |
| 11                | Analysis and synthesis processes                      | Describe the analysis and synthesis processes in detail. This section should include information on the constructs analyzed and describe the analytic process.                                                                                                                                                                                                                          | Y | 10            |
| <b>RESULTS</b>    |                                                       |                                                                                                                                                                                                                                                                                                                                                                                         |   |               |
| 12                | Document flow diagram                                 | Provide details on the number of documents assessed for eligibility and included in the review with reasons for exclusion at each stage as well as an indication of their source of origin (for example, from searching databases, reference lists and so on). You may consider using the example templates (which are likely to need modification to suit the data) that are provided. | Y | Figure 1      |
| 13                | Document characteristics                              | Provide information on the characteristics of the documents included in the review.                                                                                                                                                                                                                                                                                                     | Y | Table 2       |
| 14                | Main findings                                         | Present the key findings with a specific focus on theory building and testing.                                                                                                                                                                                                                                                                                                          | Y | Page 15 to 24 |
| <b>DISCUSSION</b> |                                                       |                                                                                                                                                                                                                                                                                                                                                                                         |   |               |
| 15                | Summary of findings                                   | Summarize the main findings, taking into account the review's objective(s), research question(s), focus and intended audience(s).                                                                                                                                                                                                                                                       | Y | 25            |
| 16                | Strengths, limitations and future research directions | Discuss both the strengths of the review and its limitations. These should include (but need not be restricted to) (a) consideration of all the steps in the review process and (b) comment on the overall strength of evidence supporting the explanatory insights which emerged. The limitations identified may point to areas where further work is needed.                          | Y | 26-28         |
| 17                | Comparison with existing literature                   | Where applicable, compare and contrast the review's findings with the existing literature (for example, other reviews) on the same topic.                                                                                                                                                                                                                                               | Y | 25 to 26      |
| 18                | Conclusion and recommendations                        | List the main implications of the findings and place these in the context of other relevant literature. If appropriate, offer recommendations for policy and practice.                                                                                                                                                                                                                  | Y | 27            |
| 19                | Funding                                               | Provide details of funding source (if any) for the review, the role played by the funder (if any) and any conflicts of interests of the reviewers.                                                                                                                                                                                                                                      | Y | 29            |

## Supplementary file 2: Realist Review Protocol

**Title:** Circumstances that promote social connectedness in older adults participating in intergenerational programs with adolescents: a realist review

### Introduction

Intergenerational programs are programs that involve two unrelated generational groups and result in a mutually beneficial outcome for the participants. Erikson's theory of psychosocial development highlights that adolescents (for the purpose of this review aged 13-19) and older adults (for the purpose of this review 65 and older) are at comparable stages, facing questions around identity and integrity and dealing with life transitions of puberty and retirements respectively.

Social connectedness is highlighted as a major factor in wellbeing and health, particularly for older adults. The perceived or real lack of opportunities to be connected socially and with society can have negative impacts on a person's physical, social and mental health.

For the purpose of this review, the impact of intergenerational programs, that involve both adolescents and older adults, on social connectedness outcomes in the older adult group will be explored. The contexts and mechanism by which the program was delivered will also be explored as key parts of the interventions with the result of the review aiming to determine what contexts and mechanisms lead to the most beneficial outcomes for social connectedness. The objective of this realist review is to develop a program theory that guides the development of intergenerational programs involving adolescents and older adults, that impact upon social connectedness in older adults. There is a current gap in the literature addressing programs that involve specifically adolescents and their impact on the domain of social connectedness.

### Review Question

The SPIDER framework was used to develop the review question, which is based on describing the Sample (S), Phenomenon of Interest (PI), Design (D), Evaluation (E), and Research type (R) (Cook et al. 2012).

*Sample:* Adults aged 65 and over and adolescents aged 13-19 that are unrelated and engaged in engaged in intergenerational programs

1  
2  
3  
4  
5  
6  
7  
8  
9  
10  
11  
12  
13  
14  
15  
16  
17  
18  
19  
20  
21  
22  
23  
24  
25  
26  
27  
28  
29  
30  
31  
32  
33  
34  
35  
36  
37  
38  
39  
40  
41  
42  
43  
44  
45  
46  
47  
48  
49  
50  
51  
52  
53  
54  
55  
56  
57  
58  
59  
60

*Phenomenon of interest:* Any type of Intergenerational programs that involve two non-familial generational groups - adults aged 65 and over and adolescents aged 13-19. Inclusive of intergenerational programs that take place in community settings, including educational and aged care settings.

*Design:* Realist review

*Evaluation:* We will focus on characteristics, views and experiences from qualitative literature. From quantitative literature we will focus on the assessment of outcomes such as social connectedness, social isolation, social loneliness, social support, social participation and social interaction.

*Research type:* Quantitative studies, qualitative studies, mixed methods.

Final review question: *Which circumstances promote social connectedness in older adults participating in intergenerational programs with adolescent?*

**Plan for generation of *a priori* theories:**

*A priori* theories will be developed utilising an iterative, two-part process. This will include an initial scoping search of Medline using the search terms outlined in the *Search Strategy* section below. We will also undertake initial engagement with relevant stakeholder to develop the *a priori* theories. The idea for this review came from a collaboration involving the authors, a municipality in regional Victoria, Australia, and a high school located within that municipality. Originally, the collaboration was centred on the development and evaluation of a pilot intergenerational digital literacy program involving adolescent school pupils and older community-dwelling individuals. However, during the initial stages of designing the program, the authors identified there was an absence of review-level evidence regarding intergenerational programs involving adolescents and older people. A decision was made to undertake a realist review on this topic. Municipal and high school collaborator stakeholders, namely senior teachers, municipal project officers and positive ageing ambassadors, will be involved in the process of generating *a priori* theories by contributing information on the need and opportunity for intergenerational programs in the school environment.

## Search Strategy

The following electronic databases will be searched using English language limitation: MEDLINE, PsychINFO, CINAHL. Google Scholar will be used to supplement the search using a simplified search terms list from below.

Search terms included; (Aged OR "older adult" OR senior OR elder\* OR geriatric OR "old\* person\*") AND ("intergenerational relation\*" OR "intergenerational program\*" OR "intergenerational activit\*" OR "intergenerational practice" OR "intergenerational learning" OR "intergenerational service learning" OR "intergenerational relations" OR intergenerational) AND ("social connect\*" OR "social isolation" OR "social interact\*" OR loneliness OR "social participation") AND ("adolescent")

## Inclusion and Exclusion Criteria

Qualitative, Quantitative and Mixed method studies will be eligible for inclusion

| Included                                     | Excluded                                                                                               |
|----------------------------------------------|--------------------------------------------------------------------------------------------------------|
| Study reported on intergenerational programs | Reported on non-intergenerational programs                                                             |
| Participants from non-familial generations   | Studies involving the study of grandparents / grandparenting or family intergenerational relationships |
| Aged 13-19                                   | Aged <13                                                                                               |
| Aged 65 and above                            | Aged 20-64                                                                                             |
| Published 2000-2020                          | Published before 2000                                                                                  |
| Published in English                         | Not published in English                                                                               |

Where studies include part of the age range and are determined to contribute to the development of the program theory, they will be included. Two reviewers will determine such studies inclusion.

## Study Selection

Two reviewers will determine included studies. Inclusion criteria as above will be applied to the studies retrieved from the search.

## Data extraction and Quality Assessment

Data will be extracted using a bespoke data extraction form. A bespoke quality assessment tool will be developed. Both data extraction and quality assessment will be undertaken by two reviewers.

**Data synthesis**

The aim of the synthesis is to identify potential context-mechanism-outcome configurations (CMOCs) to develop a programme theory about the circumstances that can promote social connectedness in older adults participating in intergenerational programs with adolescent.

For peer review only

1  
2  
3  
4  
5  
6  
7  
8  
9  
10  
11  
12  
13  
14  
15  
16  
17  
18  
19  
20  
21  
22  
23  
24  
25  
26  
27  
28  
29  
30  
31  
32  
33  
34  
35  
36  
37  
38  
39  
40  
41  
42  
43  
44  
45  
46  
47  
48  
49  
50  
51  
52  
53  
54  
55  
56  
57  
58  
59  
60

**REFERENCES**

Cooke A, Smith D and Booth A (2012) Beyond PICO: The SPIDER Tool for Qualitative Evidence Synthesis. *Qualitative Health Research* 22(10) 1435-1443

For peer review only

| Number                             | combined          | Search term - Medline                   | MeSH | Keyword | total      |     |
|------------------------------------|-------------------|-----------------------------------------|------|---------|------------|-----|
| 3 or 7                             | 2963804           | (MH "Aged") OR (MH "Aged, 80 and Over") | yes  |         | 3076650    |     |
|                                    | <b>OR</b>         |                                         |      |         |            |     |
|                                    | 355786            | "older adult" OR                        |      |         |            | yes |
|                                    |                   | senior OR                               |      |         |            | yes |
|                                    |                   | elder* OR                               |      |         |            | yes |
|                                    |                   | geriatric OR                            |      |         |            | yes |
| "old* person*" OR                  |                   |                                         |      | yes     |            |     |
| 1 or 2 or 4                        | <b>AND</b>        |                                         |      |         |            |     |
|                                    | 6242              | "intergenerational relation*" OR        |      |         | yes        |     |
|                                    |                   | "intergenerational program*" OR         |      |         | yes        |     |
|                                    |                   | "intergenerational activit*" OR         |      |         | yes        |     |
|                                    |                   | "intergenerational practice" OR         |      |         | yes        |     |
|                                    |                   | "intergenerational learning"            |      |         | yes        |     |
|                                    | <b>OR</b>         |                                         |      |         |            |     |
|                                    | 3734              | intergenerational relations             | yes  |         |            |     |
|                                    | <b>OR</b>         |                                         |      |         |            |     |
| 6242                               | intergenerational |                                         |      | yes     |            |     |
| 5                                  | <b>AND</b>        |                                         |      |         |            |     |
|                                    | 44986             | "social connect*" OR                    |      |         | yes        |     |
|                                    |                   | "social isolation" OR                   |      |         | yes        |     |
|                                    |                   | "social interact*" OR                   |      |         | yes        |     |
|                                    |                   | loneliness OR                           |      |         | yes        |     |
|                                    |                   | "social participation"                  |      |         | yes        |     |
| <b>TOTAL</b>                       |                   |                                         |      |         |            |     |
| <b>5 and 6 and 8</b>               |                   |                                         |      |         | <b>105</b> |     |
| <b>Limited to english language</b> |                   |                                         |      |         | <b>93</b>  |     |



| Number                | combined                                   | Search term -CINAHL                     | MeSH | Keyword | total      |  |
|-----------------------|--------------------------------------------|-----------------------------------------|------|---------|------------|--|
| S1 OR S5              | 720418                                     | (MH "Aged") OR (MH "Aged, 80 and Over") | yes  |         | 772260     |  |
|                       | <b>OR</b>                                  |                                         |      |         |            |  |
|                       | 162145                                     | "older adult" OR                        |      | yes     |            |  |
|                       |                                            | senior OR                               |      | yes     |            |  |
|                       |                                            | elder* OR                               |      | yes     |            |  |
|                       |                                            | geriatric OR                            |      | yes     |            |  |
| "old* person*" OR     |                                            |                                         | yes  |         |            |  |
| <b>AND</b>            |                                            |                                         |      |         |            |  |
| S2 OR S3              | 6242                                       | "intergenerational relation*" OR        |      | yes     | 6242       |  |
|                       |                                            | "intergenerational program*" OR         |      | yes     |            |  |
|                       |                                            | "intergenerational activit*" OR         |      | yes     |            |  |
|                       |                                            | "intergenerational practice" OR         |      | yes     |            |  |
|                       |                                            | "intergenerational learning"            |      | yes     |            |  |
|                       | <b>OR</b>                                  |                                         |      |         |            |  |
| 6242                  | intergenerational                          |                                         | yes  |         |            |  |
| <b>AND</b>            |                                            |                                         |      |         |            |  |
| S6                    | 22543                                      | "social connect*" OR                    |      | yes     | 22543      |  |
|                       |                                            | "social isolation" OR                   |      | yes     |            |  |
|                       |                                            | "social interact*" OR                   |      | yes     |            |  |
|                       |                                            | loneliness OR                           |      | yes     |            |  |
|                       |                                            | "social participation"                  |      | yes     |            |  |
| <b>TOTAL</b>          |                                            |                                         |      |         | <b>143</b> |  |
| S6 AND S12<br>AND S14 | <b>Limited to age and english language</b> |                                         |      |         | <b>139</b> |  |

| Number               | combined                           | Search term -PsycINFO                   | MeSH | Keyword | total      |  |
|----------------------|------------------------------------|-----------------------------------------|------|---------|------------|--|
| 1 or 6               |                                    | (MH "Aged") OR (MH "Aged, 80 and Over") |      | yes     |            |  |
|                      | <b>OR</b>                          |                                         |      |         |            |  |
|                      |                                    | "older adult" OR                        |      | yes     |            |  |
|                      |                                    | senior OR                               |      | yes     |            |  |
|                      |                                    | elder* OR                               |      | yes     |            |  |
|                      |                                    | geriatric OR                            |      | yes     |            |  |
|                      |                                    | "old* person*"                          |      | yes     |            |  |
| 2 or 3 or 4          | <b>AND</b>                         |                                         |      |         |            |  |
|                      |                                    | "intergenerational relation*" OR        |      | yes     |            |  |
|                      |                                    | "intergenerational program*" OR         |      | yes     |            |  |
|                      |                                    | "intergenerational activit*" OR         |      | yes     |            |  |
|                      |                                    | "intergenerational practice" OR         |      | yes     |            |  |
|                      |                                    | "intergenerational learning"            |      | yes     |            |  |
|                      | <b>OR</b>                          |                                         |      |         |            |  |
|                      |                                    | intergenerational relations             | yes  |         |            |  |
| <b>OR</b>            |                                    |                                         |      |         |            |  |
|                      | intergenerational                  |                                         | yes  |         |            |  |
| 5                    | <b>AND</b>                         |                                         |      |         |            |  |
|                      |                                    | "social connect*" OR                    |      | yes     |            |  |
|                      |                                    | "social isolation" OR                   |      | yes     |            |  |
|                      |                                    | "social interact*" OR                   |      | yes     |            |  |
|                      |                                    | loneliness OR                           |      | yes     |            |  |
|                      | "social participation"             |                                         | yes  |         |            |  |
| <b>5 and 6 and 7</b> | <b>TOTAL</b>                       |                                         |      |         | <b>144</b> |  |
|                      | <b>Limited to english language</b> |                                         |      |         | <b>133</b> |  |

1  
2  
3  
4  
5  
6  
7  
8  
9  
10  
11  
12  
13  
14  
15  
16  
17  
18  
19  
20  
21  
22  
23  
24  
25  
26  
27  
28  
29  
30  
31  
32  
33  
34  
35  
36  
37  
38  
39  
40  
41  
42  
43  
44  
45  
46

|                                                                                                                 |           |
|-----------------------------------------------------------------------------------------------------------------|-----------|
| <b>Google Scholar</b>                                                                                           |           |
| older people or aged or senior AND "intergenerational program*" or intergenerational AND "social connectedness" | <b>73</b> |

|                   |                                   |
|-------------------|-----------------------------------|
| <b>Search two</b> | Added "adolescent" to each search |
|-------------------|-----------------------------------|

For peer review only

**Supplementary File 4: Inclusion and Exclusion Criteria**

| Included                                                                                               | Excluded                                                                                               |
|--------------------------------------------------------------------------------------------------------|--------------------------------------------------------------------------------------------------------|
| Study reporting on intergenerational programs. Study can be quantitative, qualitative or mixed-methods | Reported on non-intergenerational programs                                                             |
| Participants from non-familial generations                                                             | Studies involving the study of grandparents / grandparenting or family intergenerational relationships |
| Aged 13-19                                                                                             | Aged <13                                                                                               |
| Aged 65 and above                                                                                      | Aged 20-64                                                                                             |
| Published 2000-2020                                                                                    | Published before 2000                                                                                  |
| Published in English                                                                                   | Not published in English                                                                               |

1  
2  
3  
4  
5 **SUPPLEMENTARY FILE 5: DATA EXTRACTION FORM**  
6  
7

| <b>1. Bibliographic details</b>                                                           |  |
|-------------------------------------------------------------------------------------------|--|
| Article number:                                                                           |  |
| Article reference:                                                                        |  |
| Extracted by:                                                                             |  |
| Checked by:                                                                               |  |
| Researcher details (discipline or professional background)                                |  |
| What are the geographic details of the study?                                             |  |
| <b>2. Aims and Methods</b>                                                                |  |
| What is the study type?                                                                   |  |
| What methods were used?                                                                   |  |
| Are the aims/ objectives clearly stated in the study? Detail                              |  |
| Is the research question/s stated explicitly or within the text? Detail                   |  |
| What materials were used to collect the data?                                             |  |
| How was the data analysed?                                                                |  |
| Does the intervention use a particular theory to inform its design?                       |  |
| <b>3. Participants</b>                                                                    |  |
| What was the sample size?                                                                 |  |
| What were the sample characteristics?                                                     |  |
| How were participants recruited?                                                          |  |
| What were the inclusion and exclusion criteria?                                           |  |
| <b>4. Intervention details</b>                                                            |  |
| What was the intervention?                                                                |  |
| How was the intervention delivered?                                                       |  |
| Who is delivering the intervention?                                                       |  |
| In what setting was the intervention delivered?<br>Why was this setting / context chosen? |  |
| Was this setting appropriate to examine the research question?                            |  |
| Was the intervention designed with the participants (one or both age groups)?             |  |
| How were adolescents involved in the intervention?                                        |  |

|    |                                                                                                                                                                                                                                  |  |
|----|----------------------------------------------------------------------------------------------------------------------------------------------------------------------------------------------------------------------------------|--|
| 1  | How were older people involved in the intervention?                                                                                                                                                                              |  |
| 2  |                                                                                                                                                                                                                                  |  |
| 3  |                                                                                                                                                                                                                                  |  |
| 4  |                                                                                                                                                                                                                                  |  |
| 5  | <b>5. Findings/ Results</b>                                                                                                                                                                                                      |  |
| 6  | What was the reported experiences of the participants?                                                                                                                                                                           |  |
| 7  |                                                                                                                                                                                                                                  |  |
| 8  | What was the reported experience of the facilitators?                                                                                                                                                                            |  |
| 9  |                                                                                                                                                                                                                                  |  |
| 10 | Did the intervention focus on/ impact on social connectedness?                                                                                                                                                                   |  |
| 11 |                                                                                                                                                                                                                                  |  |
| 12 | Did the adolescents report (or was it reported by others) greater understanding of older people?                                                                                                                                 |  |
| 13 |                                                                                                                                                                                                                                  |  |
| 14 |                                                                                                                                                                                                                                  |  |
| 15 | Did the older people report (or was it reported by others) impact upon social connectedness?                                                                                                                                     |  |
| 16 |                                                                                                                                                                                                                                  |  |
| 17 |                                                                                                                                                                                                                                  |  |
| 18 | Did the older people report (or was it reported by others) impact upon overall health and wellbeing?                                                                                                                             |  |
| 19 |                                                                                                                                                                                                                                  |  |
| 20 |                                                                                                                                                                                                                                  |  |
| 21 | Did the older people report (or was it reported by others) greater understanding of the younger generation?                                                                                                                      |  |
| 22 |                                                                                                                                                                                                                                  |  |
| 23 |                                                                                                                                                                                                                                  |  |
| 24 | Did the age range of the participants impact upon the success of the intervention? Were there structural barriers here e.g. transport, health issues?                                                                            |  |
| 25 |                                                                                                                                                                                                                                  |  |
| 26 |                                                                                                                                                                                                                                  |  |
| 27 |                                                                                                                                                                                                                                  |  |
| 28 |                                                                                                                                                                                                                                  |  |
| 29 | What themes (qualitative) / headline findings (quantitative) were generated by the study? (around intergenerational programs, adolescents, older people, context in which delivered/ undertaken)                                 |  |
| 30 |                                                                                                                                                                                                                                  |  |
| 31 |                                                                                                                                                                                                                                  |  |
| 32 |                                                                                                                                                                                                                                  |  |
| 33 | Are the findings interpreted within the contexts of other studies and theory?                                                                                                                                                    |  |
| 34 |                                                                                                                                                                                                                                  |  |
| 35 | <b>6. Were the <i>a priori</i> theories supported/ confirmed?</b>                                                                                                                                                                |  |
| 36 | That intergenerational programs involving adolescents and older adults improve social connectedness in the older adult group                                                                                                     |  |
| 37 |                                                                                                                                                                                                                                  |  |
| 38 | That intergenerational programs conducted in educational contexts result in positive outcomes in social connectedness for one/both groups                                                                                        |  |
| 39 |                                                                                                                                                                                                                                  |  |
| 40 | Adolescents and older people are at a similar psychological milestone and therefore are mutual beneficiaries of intergenerational programs                                                                                       |  |
| 41 |                                                                                                                                                                                                                                  |  |
| 42 | Older people may be socially disconnected in the absence of loneliness- intergenerational programs help support meaningful connections within the community, with individuals outside of their normal age and social demographic |  |
| 43 |                                                                                                                                                                                                                                  |  |
| 44 | Greater generativity is formed through participation in intergenerational programs                                                                                                                                               |  |
| 45 |                                                                                                                                                                                                                                  |  |
| 46 | Intergenerational programs conducted in educational contexts build community connections between generations and across structural community assets like schools.                                                                |  |
| 47 |                                                                                                                                                                                                                                  |  |
| 48 | What new theories were generated by this study?                                                                                                                                                                                  |  |
| 49 |                                                                                                                                                                                                                                  |  |
| 50 |                                                                                                                                                                                                                                  |  |
| 51 |                                                                                                                                                                                                                                  |  |
| 52 |                                                                                                                                                                                                                                  |  |
| 53 |                                                                                                                                                                                                                                  |  |
| 54 |                                                                                                                                                                                                                                  |  |
| 55 |                                                                                                                                                                                                                                  |  |
| 56 |                                                                                                                                                                                                                                  |  |
| 57 |                                                                                                                                                                                                                                  |  |
| 58 |                                                                                                                                                                                                                                  |  |
| 59 |                                                                                                                                                                                                                                  |  |
| 60 |                                                                                                                                                                                                                                  |  |

**SUPPLEMENTARY FILE 6: QUALITY ASSESSMENT**

| <b>Quality Assessment Criteria</b> |                                                                                                                                                                                          |
|------------------------------------|------------------------------------------------------------------------------------------------------------------------------------------------------------------------------------------|
| <b>1</b>                           | Is there adequate rationale for using this design to address the research aim/ question?                                                                                                 |
| <b>2</b>                           | Did the authors justify the sample size used?                                                                                                                                            |
| <b>3</b>                           | Is adequate evidence provided to support the findings?                                                                                                                                   |
| <b>4</b>                           | Quantitative Studies: When comparing / analysing the groups (if more than one), did the authors consider the<br>- Comparability<br>- Confounding variables<br>and controlling for these? |
| <b>5</b>                           | Qualitative Studies: Did the researchers consider their own position, assumptions and possible biases?                                                                                   |
| <b>6</b>                           | Were the strengths and limitations stated?                                                                                                                                               |
| <b>7</b>                           | Was ethical committee approval obtained?                                                                                                                                                 |
| <b>8</b>                           | How valuable is this research to the review? High, Medium or Low                                                                                                                         |

\*Items 1,2,3,5,7,8 from CASP qualitative checklist (CASP 2018a). Items 5, 1 and 7 also from Long (2005). Item 4 from CASP Cohort Study Checklist (CASP 2018b)

**REFERENCES**

Long A (2005). Evaluative tool for mixed method studies. University of Leeds, School of Healthcare[online]. 24:2017.

Critical Appraisal Skills Programme (2018). CASP (Qualitative) Checklist. [online] Available at: [https://casp-uk.net/images/checklist/documents/CASP-Qualitative-Studies-Checklist/CASP-Qualitative-Checklist-2018\\_fillable\\_form.pdf](https://casp-uk.net/images/checklist/documents/CASP-Qualitative-Studies-Checklist/CASP-Qualitative-Checklist-2018_fillable_form.pdf). Date Accessed: 17/2/20

Critical Appraisal Skills Programme (2018). CASP (Cohort Study) Checklist. [online] Available at: [https://casp-uk.net/images/checklist/documents/CASP-Cohort-Study-Checklist/CASP-Cohort-Study-Checklist-2018\\_fillable\\_form.pdf](https://casp-uk.net/images/checklist/documents/CASP-Cohort-Study-Checklist/CASP-Cohort-Study-Checklist-2018_fillable_form.pdf). Accessed: Date Accessed: 17/2/20

| Quality Assessment Criteria |                                                                                                                                                                                       | de Souza[45] | Kessler and Staudinger[37] | Hernandez and Gonzalez[46] | Wilson, Cordier[47] | Biggs and Knox[48] | Knight, Skouteris[35] | Ostensen, Gjevjon[15] | Santini, Tombolesi[49] | Wilson, Cordier[33] |
|-----------------------------|---------------------------------------------------------------------------------------------------------------------------------------------------------------------------------------|--------------|----------------------------|----------------------------|---------------------|--------------------|-----------------------|-----------------------|------------------------|---------------------|
| 1                           | Is there adequate rationale for using this design to address the research aim/question?                                                                                               | ✓            | ✓                          | ✓                          | ✓                   | ✓                  | ✓                     | ✓                     | ✓                      | ✓                   |
| 2                           | Did the authors justify the sample size used?                                                                                                                                         | UNCLEAR      | ✓                          | ✓                          | ✓                   | ✓                  | ✓                     | ✓                     | ✓                      | ✓                   |
| 3                           | Is adequate evidence provided to support the findings?                                                                                                                                | ✓            | ✓                          | ✓                          | ✓                   | UNCLEAR            | ✓                     | ✓                     | ✓                      | ✓                   |
| 4                           | Quantitative Studies: When comparing / analysing the groups (if more than one), did the authors consider the<br>- Comparability<br>- Confounding variables and controlling for these? | N/A          | ✓                          | ✓                          | N/A                 | ✓                  | N/A                   | N/A                   | N/A                    | ✓                   |
| 5                           | Qualitative Studies: Did the researchers consider their own position, assumptions and possible biases?                                                                                | UNCLEAR      | N/A                        | N/A                        | ✓                   | N/A                | ✓                     | UNCLEAR               | ✓                      | UNCLEAR             |
| 6                           | Were the strengths and limitations stated?                                                                                                                                            | ✓            | ✓                          | ✓                          | ✓                   | ✓                  | ✓                     | ✓                     | ✓                      | ✓                   |
| 7                           | Was ethical committee approval obtained?                                                                                                                                              | UNCLEAR      | UNCLEAR                    | ✓                          | ✓                   | ✓                  | ✓                     | ✓                     | UNCLEAR                | ✓                   |
| 8                           | How valuable is this research to the review? High, Medium or Low                                                                                                                      | HIGH         | HIGH                       | MEDIUM                     | HIGH                | MEDIUM             | HIGH                  | HIGH                  | HIGH                   | HIGH                |



# BMJ Open

## Circumstances that promote social connectedness in older adults participating in intergenerational programs with adolescents: a realist review

|                                 |                                                                                                                                                                                                                                                            |
|---------------------------------|------------------------------------------------------------------------------------------------------------------------------------------------------------------------------------------------------------------------------------------------------------|
| Journal:                        | <i>BMJ Open</i>                                                                                                                                                                                                                                            |
| Manuscript ID                   | bmjopen-2022-069765.R2                                                                                                                                                                                                                                     |
| Article Type:                   | Original research                                                                                                                                                                                                                                          |
| Date Submitted by the Author:   | 09-Aug-2023                                                                                                                                                                                                                                                |
| Complete List of Authors:       | Simionato, J; La Trobe University, Department of Public Health<br>Vally, H; Deakin University, Institute for Health Transformation<br>Archibald, Daryll; University of Dundee, School of Health Sciences; La Trobe University, Department of Public Health |
| <b>Primary Subject Heading</b>: | Public health                                                                                                                                                                                                                                              |
| Secondary Subject Heading:      | Sociology                                                                                                                                                                                                                                                  |
| Keywords:                       | PUBLIC HEALTH, SOCIAL MEDICINE, PREVENTIVE MEDICINE                                                                                                                                                                                                        |
|                                 |                                                                                                                                                                                                                                                            |

SCHOLARONE™  
Manuscripts



I, the Submitting Author has the right to grant and does grant on behalf of all authors of the Work (as defined in the below author licence), an exclusive licence and/or a non-exclusive licence for contributions from authors who are: i) UK Crown employees; ii) where BMJ has agreed a CC-BY licence shall apply, and/or iii) in accordance with the terms applicable for US Federal Government officers or employees acting as part of their official duties; on a worldwide, perpetual, irrevocable, royalty-free basis to BMJ Publishing Group Ltd ("BMJ") its licensees and where the relevant Journal is co-owned by BMJ to the co-owners of the Journal, to publish the Work in this journal and any other BMJ products and to exploit all rights, as set out in our [licence](#).

The Submitting Author accepts and understands that any supply made under these terms is made by BMJ to the Submitting Author unless you are acting as an employee on behalf of your employer or a postgraduate student of an affiliated institution which is paying any applicable article publishing charge ("APC") for Open Access articles. Where the Submitting Author wishes to make the Work available on an Open Access basis (and intends to pay the relevant APC), the terms of reuse of such Open Access shall be governed by a Creative Commons licence – details of these licences and which [Creative Commons](#) licence will apply to this Work are set out in our licence referred to above.

Other than as permitted in any relevant BMJ Author's Self Archiving Policies, I confirm this Work has not been accepted for publication elsewhere, is not being considered for publication elsewhere and does not duplicate material already published. I confirm all authors consent to publication of this Work and authorise the granting of this licence.

1  
2  
3  
4  
5  
6  
7  
8  
9  
10  
11  
12  
13  
14  
15  
16  
17  
18  
19  
20  
21  
22  
23  
24  
25  
26  
27  
28  
29  
30  
31  
32  
33  
34  
35  
36  
37  
38  
39  
40  
41  
42  
43  
44  
45  
46  
47  
48  
49  
50  
51  
52  
53  
54  
55  
56  
57  
58  
59  
60

## **Circumstances that promote social connectedness in older adults participating in intergenerational programs with adolescents: a realist review**

Authors: Simionato J<sup>1</sup>, Vally H<sup>2</sup> and Archibald D<sup>1,3</sup>

<sup>1</sup> Department of Public Health, La Trobe University, Plenty Road and Kingsbury Drive, VIC 3086 Australia

<sup>2</sup> School of Health and Social Development, Deakin University, 221 Burwood Highway, Burwood, VIC 3125, Australia

<sup>3</sup> School of Health Sciences, University of Dundee, 11 Airlie Place, Dundee DD1 4HJ, Dundee, United Kingdom

Key words: Intergenerational Program, Older adults, Adolescents, Social Connectedness, Realist Review

Corresponding author:

Dr Daryll Archibald, School of Health Sciences, University of Dundee, 11 Airlie Place, Dundee DD1 4HJ. Email: [DArchibald001@dundee.ac.uk](mailto:DArchibald001@dundee.ac.uk)

**Word Count: 5962**

**ABSTRACT**

**Objectives:** Limited social connectedness in older adults is a risk factor for poor physical and mental health. Older adults who are socially isolated, lonely and disconnected have a higher risk of chronic illness, depression and premature death. Current literature suggests that improved social connectedness reduces these risks. Intergenerational programs are an effective way to improve health outcomes. Despite this, there is yet to be a review using realist review methods that seeks to identify the circumstances that promote social connectedness in older adults participating in intergenerational programs with adolescents.

**Design:** A realist review methodology was chosen to account for the complexity of intergenerational interventions. Nine studies were included. In line with realist review methodology, iterative data extraction and analysis was conducted to identify the specific contexts, mechanisms, and outcomes of the programs. Specific circumstances were identified to develop theories relating to improved social connectedness in older adults.

**Data sources:** MEDLINE, PsychINFO, CINAHL were searched using English language limitation.

**Eligibility criteria:** Included participants were aged 65 and over (older adults) and between 13 and 19 years (adolescents) participating in intergenerational programs from non-familial generations. Studies had to be published in English between 2000 and 2020 and could be quantitative, qualitative or mixed-methods primary research studies.

**Data extraction and synthesis:** Two independent reviewers used a bespoke data extraction form. All authors were involved in the synthesis process which used the extracted data to illuminate the contexts, mechanisms and outcomes that underpinned reviewed programs.

**Results:** The nine included studies were set in different contexts, including community organisations, schools and aged care facilities and used an array of interventions including reminiscence therapy, craft, or space for conversation. Despite study heterogeneity, the parallels in psychosocial development between older adults and adolescents were shown to be a likely driver for improved social health outcomes. Programs most likely to improve social health outcomes were those that acknowledged psychosocial development, were delivered in community settings, leveraged pedagogic frameworks, used trained facilitators, and supported participants to build relationships through shared purpose.

**Conclusions:** This review contributes a logic model to support the design and development of intergenerational programs involving adolescents to improve social connectedness in older adults. Future research to test the logic model in practice is needed.

### Strengths and limitations of this study

- This is the first realist review to investigate the circumstances that promote social connectedness in older adults participating in intergenerational programs with adolescents
- Comprehensive searches were undertaken with the aim of identifying all relevant published and grey literature.
- A logic model has been developed to support the design and development of intergenerational programs involving adolescents to improve social connectedness in older adults.
- The evidence base is limited for participants living in rural locations and participants with cognitive impairment.

## INTRODUCTION

Limited social connectedness is a risk for poor health and wellbeing in older adults[1-4]. Older adults (over 65 years) are at particular risk of social disconnectedness and loneliness because of frailty and chronic illness, which may limit opportunities for social interaction[5, 6]. In addition, modern society has altered family structures, geographically dispersed the family unit and made maintaining intergenerational and family connections challenging, adding to social health vulnerability in older people[7-10]. Many older adults move into residential aged care facilities, away from familiar community supports which may impact social connectedness.

Social disconnectedness, loneliness and social isolation can be as damaging to health and wellbeing as smoking and obesity[4, 7, 11, 12]. Poor health due to acute or chronic conditions, cognitive decline or frailty influences an older person's ability to carry out personal, domestic, social or community activities and in turn increases their risk of social disconnectedness[1, 13, 14]. Older adults who remain socially connected without episodes of isolation or loneliness have lower rates of mental and chronic illnesses such as depression and cardiovascular disease[7, 11, 15-17].

Support for older adults, particularly post-retirement or when faced with cognitive or physical impairment, is essential in maintaining individual social identity and social connectedness with family, friends and the community[4, 11]. The World Health Organization has challenged communities to provide age friendly communities. This global movement is demonstrating the power of building social capital and engaging older adults through community programs and social and environmental infrastructure to support community access[18]. Intergenerational programs have emerged as a popular and beneficial option for bolstering community connections and improving the health and wellbeing of older people[11, 19, 20].

Intergenerational programs are programs where two generations experience mutual benefit through shared experiences[19, 21] and are a known mechanism for improving social connectedness[19] and providing a sense of inclusion and empowerment in older adults[22]. Intergenerational programs bring together and benefit both generational groups[22-26] and have been adopted in a variety of contexts and age groups. These include the use of pedagogic frameworks with school age children[22], service-learning interventions with university students[27, 28] and in familial groups[25].

Several previous reviews have been undertaken on intergenerational programming. For example, systematic reviews by Gualano et al.[19] and Zhong et al.[29] focused on quantitative studies of older adults aged 50 and over and younger people 30 and below undertaken in educational settings. Gualano et al.[19] found that intergenerational programs benefit older people in terms

1  
2 of keeping active and fighting social isolation, whilst Zhong et al. [29] found that intergenerational  
3 programs with young children may bring the greatest health benefits to older people across  
4 physical, mental and social domains. Further systematic reviews by Giraudeau and Bailly[30] and  
5 Martins et al.[31] included primary research studies of any type focusing on adults over 60[30]  
6 and 65[31] undertaken in a variety of community, assisted living, education, and nursing home  
7 settings. Giraudeau and Bailly[30] found that intergenerational programs bring mental health  
8 benefits for older people, whilst Martins et al.[31] reported that intergenerational programs can  
9 lead to reaffirmation of value, greater life satisfaction and improved self-esteem for older  
10 adults[31].

11  
12 In terms of impacts on children, both Martins et al.[31] and Giraudeau and Bailly[30] focused on  
13 pre-school and primary school children and found that intergenerational programs improved  
14 children's perceptions of older people. In addition, Martins et al.[31] further found that for  
15 children, intergenerational programs led to higher self-esteem, better academic performance,  
16 improved social skills and a greater motivation to learn. Gualano et al.[19] also found that  
17 intergenerational programs improved younger people's perceptions of older people. Of these  
18 systematic reviews only Giraudeau and Bailly[30] outlined circumstances that may lead to a  
19 successful intergenerational program model, stating that to be successful, intergenerational  
20 programs should provide all the participants with a sense of being useful and competent and take  
21 time to prepare younger and older people by encouraging communication between the groups  
22 before the program begins.

23  
24 A further relevant review undertaken in this area is a recently published realist review by Phang  
25 et al.[32]. This work focused on digital intergenerational programs explicitly geared towards  
26 reducing loneliness or social isolation in older adults undertaken in residential or community  
27 settings. The review identified four circumstances by which digital intergenerational program may  
28 reduce loneliness and social isolation for older adults. For community-dwelling older adults,  
29 training in digital technology and support from nurses helped to reduce loneliness. Phang et al.[32]  
30 further found that a video call with a student or family reduced loneliness among older adults  
31 residing in long-term residential care facilities, whilst videoconferencing with a lay coach may also  
32 reduce loneliness in adults who are lonely.

33  
34 The above shows that whilst there is substantial evidence supporting intergenerational programs  
35 as an effective strategy to achieve improved physical and social health and wellbeing in older  
36 adults, there is yet to be a review of programs that involve adolescents specifically.  
37 Intergenerational programs involving older adults and preschool or young children have been  
38 reported in the primary research literature [14, 21, 22, 28], however those that pair adolescents  
39 (individuals aged 13-19) and older adults are less known[33]. Pairing older adults and adolescents

1 through intergenerational programs is modelled on Erikson's theory of psychosocial  
2 development[34, 35]. According to Erikson's theory, adolescents and older adults are both facing  
3 a period in their psychosocial development focused on identity. Adolescents, emerging from  
4 childhood are looking to their peers to 'fit in' and to understand society through the eyes of others.  
5 Older adults, particularly the recently retired, are trying to maintain their identity, with a desire  
6 to contribute to society[36]. This motivation to pass on wisdom to the next generation is termed  
7 generativity[34, 35] and is important for the wellbeing of older adults as well as broader social  
8 health[4]. Intergenerational interactions through family or a formal program support the  
9 development of generativity[34, 35, 37]. The likely benefits of this generational pairing in an  
10 intergenerational program context are yet to be reviewed in depth.

11 This realist review aims to identify the circumstances in which social connectedness is optimised  
12 for older adults when taking part in intergenerational interventions with adolescents. The  
13 question underpinning the review is – which circumstances promote social connectedness in older  
14 adults participating in intergenerational programs with adolescents.  
15  
16  
17  
18  
19  
20  
21  
22  
23  
24  
25  
26  
27  
28  
29  
30  
31  
32  
33  
34  
35  
36  
37  
38  
39  
40  
41  
42  
43  
44  
45  
46  
47  
48  
49  
50  
51  
52  
53  
54  
55  
56  
57  
58  
59  
60



## METHODOLOGY

A realist review methodology was undertaken in line with the RAMESES publication standards[38]. The RAMESES checklist for this study is available in Supplementary file 1. Realist review provides a framework for understanding complex interventions and *why* they deliver the outcomes they do[39]. A protocol for the review was developed following the stages outlined by Pawson[40] and included (1) locating existing theories, (2) searching for evidence, (3) selecting articles, (4) extracting and organising data, and (5) synthesising the evidence and drawing conclusions. This is available in Supplementary file 2.

A realist review is an approach used for systematic evidence review that utilises secondary data to understand the reasons why a particular set of contexts, mechanisms and outcomes lead to a particular result. Contexts are the circumstances in which the program is delivered and how these interact with the program mechanisms. Mechanisms are the program resources, and the way participants interact with them. The result of context and mechanism interaction is what drives a particular outcome to occur. Realist review utilises generative understanding to iteratively build *a priori* theories that are then tested and refined. The *a priori* theories are initially drawn from available literature and through stakeholder consultation. Realist review uses the lenses of context, mechanism and outcome to appraise, synthesise and then test the recommendations that are constructed through the analysis process[38, 39].

### Step one: a priori theory development

The development of *a priori* theories was an iterative, two-part process[38, 39, 41] and was undertaken by JS and DA. This included stakeholder engagement and a scoping search of the peer-reviewed and grey literature on the subject, followed by *a priori* theory development that were tested against the literature and information from initial stakeholder meetings.

### Search strategy

A literature search was undertaken between May and July 2019 by JS and DA. An updated search was completed in June 2020. The search strategy was developed with the support of a La Trobe University librarian. MEDLINE, PsychINFO, CINAHL were searched using English language limitation.

The search terms were (Aged OR "older adult" OR senior OR elder\* OR geriatric OR "old\* person\*") AND ("intergenerational relation\*" OR "intergenerational program\*" OR "intergenerational activit\*" OR "intergenerational practice" OR "intergenerational learning" OR "intergenerational service learning" OR "intergenerational relations" OR intergenerational) AND ("social connect\*" OR "social isolation" OR "social interact\*" OR loneliness OR "social

1 participation") AND ("adolescent"). MeSH terms used were "Aged" OR "Aged, 80 and over) and  
2  
3 "Intergenerational relations".  
4

5 Google Scholar was used to supplement the search using a simplified search terms list. Grey  
6 literature used the same search terms and was accessed via websites, including relevant  
7 government and non-government websites including Australian Federal and State Government  
8 agencies, Not-for profits and the World Health Organization. Reference list searching was also  
9 used. The full search strategy is available in supplementary file 3.  
10  
11  
12  
13

#### 14 *Patient and public involvement*

15 No patients or members of the public were involved in this research.  
16

#### 17 *Stakeholder engagement*

18 The idea for this review came from a collaboration involving the authors, a municipality in regional  
19 Victoria, Australia, and a high school located within that municipality. Originally, the collaboration  
20 was centred on the development and evaluation of a pilot intergenerational digital literacy  
21 program involving adolescent school pupils and older community-dwelling individuals. However,  
22 during the initial stages of designing the program, the authors identified there was an absence of  
23 review-level evidence regarding intergenerational programs involving adolescents and older  
24 people. A decision was made to undertake a realist review on this topic. Municipal and high school  
25 collaborator stakeholders, namely senior teachers, municipal project officers and positive ageing  
26 ambassadors, were involved in the process of generating *a priori* theories by contributing  
27 information on the need and opportunity for intergenerational programs in the school  
28  
29  
30  
31  
32  
33  
34  
35  
36  
37

#### 38 *Study selection*

39 The inclusion and exclusion criteria were applied by JS and DA to ensure the included studies  
40 met the aim of the review. Included participants were aged 65 and over (older adults) and  
41 between 13 and 19 years (adolescents) as these age ranges are agreed as defining older adults  
42 and adolescents[34] in early theories from Erikson on psychological development. Other studies  
43 addressing intergenerational programs use Erikson theory, so this was chosen to align with the  
44 current literature [31]. To be included in the review studies had to report on intergenerational  
45 programs with participants from non-familial generations. Studies had to be published in English  
46 between 2000 and 2020 and could be quantitative, qualitative or mixed-methods primary  
47 research studies. The full inclusion and exclusion criteria can be viewed in supplementary file 4.  
48  
49  
50  
51  
52  
53  
54  
55  
56  
57  
58  
59  
60

1  
2  
3  
4  
5  
6  
7  
8  
9  
*a priori* theory development

10  
11  
12  
13  
14  
15  
16  
17  
18  
19  
20  
21  
22  
23  
24  
25  
26  
27  
28  
29  
30  
31  
32  
33  
34  
35  
36  
37  
38  
39  
40  
41  
42  
43  
44  
45  
46  
47  
48  
49  
50  
51  
52  
53  
54  
55  
56  
57  
58  
59  
60  
JS and DA developed six *a priori* theories and tested these against the literature before conducting a final literature search to check for new evidence.

**Step two: data extraction and evidence synthesis**

In step two, data extraction and evidence synthesis from the nine included studies was undertaken.

*Data extraction*

A data extraction form (supplementary file 5) was developed by DA and JS and included the *a priori* theories identified in step one. The data extraction form covered several domains including bibliographic information, aims and methods, participant details, intervention details, results and findings. The form also provided for *a priori* theory testing including extraction of evidence that proved, disproved or refined the theory. The data extraction process was completed by JS and DA.

*Quality appraisal*

A realist review method supports the inclusion of qualitative, quantitative and mixed methods studies[38, 42]. To understand the quality of included articles, we consulted critical appraisal literature[43, 44]. A tool comprising eight quality assessment criteria were developed focusing on the methodological quality and reporting quality of the included studies (supplementary file 6). Quality appraisal was conducted by JS and DA with any conflicts managed via team discussion.

*Synthesis*

All authors were involved in the evidence synthesis process using extracted data to illuminate the contexts, mechanisms and outcomes that underpinned reviewed programs. The process then involved identifying evidence combinations and testing them against the *a priori* theories to develop context mechanism outcome configurations (CMOC). The development of the CMOC presented a variety of emergent issues that were continually tested against the *a priori* theories and the known evidence. This process identified new theories and the CMOC were further refined. Ethics approval was not required for this study.

## RESULTS

Data from the included studies were synthesised to generate eight theories relating to characteristics of intergenerational programs likely to optimise social connectedness for older adults. The components of these theories are combined to form context mechanism outcome configurations (CMOC) and a logic model to support answering the question – which circumstances promote social connectedness in older adults participating in intergenerational programs with adolescents? Figure 1 below provides the results of the literature search. Nine studies were included in the review. Five were qualitative, two quantitative and two mixed were methods. The overall participant characteristics were a mix of male and female older adults and adolescents, living in the community and participating in weekly or monthly programs over a set period. The settings in which the programs took place varied, including schools, aged care facilities and community group spaces such as Men’s sheds.

**\*Insert here Figure 1: Flow Diagram**

**Table 1: Included study characteristics.**

| Included Study                    | Study details                                                                                                                                                                        | Study aim                                                                                                                                    | Sample characteristics                                                                                                                                          | Summary of findings                                                                                                                        | Use of a facilitator | Pre-program training   | Data collection and analysis                                                                                                                                                          |
|-----------------------------------|--------------------------------------------------------------------------------------------------------------------------------------------------------------------------------------|----------------------------------------------------------------------------------------------------------------------------------------------|-----------------------------------------------------------------------------------------------------------------------------------------------------------------|--------------------------------------------------------------------------------------------------------------------------------------------|----------------------|------------------------|---------------------------------------------------------------------------------------------------------------------------------------------------------------------------------------|
| <b>de Souza[45]</b>               | Qualitative; School (Brazil); Older adult participants shared life experiences with students in a classroom environment.                                                             | Intergenerational program evaluation from participant viewpoint.                                                                             | 84 randomly selected students;<br>Age 13-19 years;<br>26 older people; Age 60 years +; Male and female groups.                                                  | The intergenerational activity based on reminiscence improved social interaction and community wellbeing for older adults.                 | Unclear              | No                     | Focus group interviews followed by thematic analysis                                                                                                                                  |
| <b>Kessler and Staudinger[37]</b> | Quantitative; Laboratory (Germany); Interaction between an Older Person and Younger Person, Two Older People or Two Younger people addressing a "life problem" or a "media problem". | To understand if intergenerational interactions have the potential to facilitate psychological functioning in both adolescent and old age.   | Older women aged 70-74 n=90 and girls aged 14-15 n=90                                                                                                           | Improved cognitive performance, reduced negative age-related stereotypes and triggered generative behaviours.                              | No                   | No                     | Data collected by a series of survey, psychometric and cognitive tests. Analysis completed using planned comparisons                                                                  |
| <b>Hernandez and Gonzalez[46]</b> | Quantitative; Local council social centre (Spain); Weekly recreational activities (talks, excursions, cultural events). 32 interactive session "movement program".                   | To investigate the effect of an intergenerational program on stereotyped attitudes towards elderly people and the wellbeing of older adults. | 101 elderly people; across two groups, age M= 74 (SD=7.7) and M=75 (SD= 5.21); 179 university students; Age M=19 (SD= 0.93); Both male and female participants. | Improved outcomes in depression measures in older adults who participated in an intergenerational exercise group.                          | Yes                  | Yes – adolescents only | Pre and post sessions that included questionnaires and geriatric depression scale. Analysis via repeated measure analysis of variance (ANOVA)                                         |
| <b>Wilson, Cordier[47]</b>        | Qualitative; Men's shed (Australia); 10 week intergenerational mentoring program over with older male mentors offering support to younger at risk males                              | To explore the experiences and perceptions of mentors involved in an occupation skill focussed program with teenage boys.                    | 9 teenage boys; Age ~15 years; 6 older male mentors; Age 60-75; a project facilitator and a youth worker. All participants were male.                           | Intergenerational programs involving older adults with a strong sense of generativity were shown to be a valuable resource to communities. | Yes                  | Yes- both groups       | Pre and post Individual interviews and focus groups with both groups however only reported on data from older adult participants using constant comparative method of grounded theory |

|                               |                                                                                                                                                                                     |                                                                                                                                                                                                 |                                                                                                                                                                                       |                                                                                                                                                      |     |                        |                                                                                                                                                                                                                                                      |
|-------------------------------|-------------------------------------------------------------------------------------------------------------------------------------------------------------------------------------|-------------------------------------------------------------------------------------------------------------------------------------------------------------------------------------------------|---------------------------------------------------------------------------------------------------------------------------------------------------------------------------------------|------------------------------------------------------------------------------------------------------------------------------------------------------|-----|------------------------|------------------------------------------------------------------------------------------------------------------------------------------------------------------------------------------------------------------------------------------------------|
| <b>Biggs and Knox[48]</b>     | Qualitative; Residential care/ assisted living (USA (Texas)); Girl scout meetings held in assisted living facility                                                                  | To identify impact of an intergenerational program for girl scouts (young people) and residents (older people) on quality of life, social interaction and personal attitudes.                   | Focus groups comprised of parents = 8, residents = 5, staff = 10, children (scouts and daisies) 5-12 years = 9; Content essay participants ages 6-16: n= 18; All participants female. | Intergenerational programs using social workers and community volunteers strengthened intergenerational relationships.                               | Yes | No                     | Focus group interviews with both groups and submitted essays from the younger participants followed by hematic analysis                                                                                                                              |
| <b>Knight, Skouteris[35]</b>  | Mixed Methods; Residential aged care setting (Australia); Development of a life story review book by adolescent students partnered with an older adult.                             | To pilot and test the feasibility of an intergenerational program "My Life Story".                                                                                                              | Adolescents n= 24; Age M= 14.56 (SD=0.5); Older adults n= 12; Age M=90.58 (SD=3.59); Gender of participants not stated                                                                | Improved social connectedness and community engagement resulted from an intergenerational program using reminiscence.                                | Yes | Yes- both groups       | Qualitative data collected (post) using semi-structured interviews and quantitative data collected (pre and post) using a series of items followed by thematic analysis and paired t-tests.                                                          |
| <b>Ostensen, Gjevjon[15]</b>  | Qualitative; Residential care facility or private home (Norway) Sessions over a 12-month period with volunteer adolescents supporting older adults to learn use of a tablet device. | To explore a new model of care that supports older people to participate by introducing technology and mobilising volunteer services.                                                           | Older adults n= 15 (5 withdrew due to illness, death and hospitalisation); Adolescents n=not stated; Age 54-94 years; Both male and female participants.                              | Reduction in anxiety and increase in social activity for older adults followed an intergenerational program supporting older adults to use an iPad.  | Yes | Yes- adolescents only  | Individual semi structured interviews repeated over a 12 month period with the older adults only followed by thematic analysis                                                                                                                       |
| <b>Santini, Tombolesi[49]</b> | Qualitative; Residential aged care facility (Italy); Intergenerational activity based meetings with aged care residents, older adult community volunteers and adolescents.          | To understand if creating community space and planning activities where adolescents, older adults, and active older volunteers meet and interact will improve health outcomes for older adults. | 14-year-old students n=25 (18 males and 7 females) and three teachers; 16 older residents; Age M=83; three social workers; 16 older volunteers; Age M=70                              | The intergenerational program improved the wellbeing of institutionalised older adults.                                                              | Yes | Yes- both groups       | Individual and focus groups Interviews with students; individual interview with older adults; focus groups with volunteers before, during and after the intervention followed by content analysis                                                    |
| <b>Wilson, Cordier[33]</b>    | Mixed methods; Men's shed (Australia); Intergenerational mentoring program with older adults and young adults with intellectual disability.                                         | To examine the feasibility of a novel Men's Shed intergenerational mentoring intervention for young adults with intellectual disability.                                                        | 5 mentees (average age 16); Older adult mentors n=12; Age M=69.5 (SD=8.53); All participants were male.                                                                               | Intergenerational mentoring interventions for youth with intellectual disability at community Men's Sheds were shown to be feasible and appropriate. | Yes | Yes- older adults only | Quantitative data via pre-and post-intervention outcome measures and descriptive data of mentees' functional skills. Qualitative data collected at end of project via individual interviews with mentees and mentors. Used realist evaluation method |

The characteristics of the included studies are provided in Table 1. In phase two of the review, data was analysed to 1) confirm the degree to which the a priori theories identified in phase one (see Table 2) were supported and 2) generate the contexts, mechanisms and outcomes from the included interventions.

### Quality Assessment

In line with recommendations for realist reviews[40] no studies were excluded following quality assessment, rather each study was ultimately assessed for its contribution to theory development and context mechanism outcome configurations. The quality assessment of each included study concluded with an overall estimate of how valuable the study was to the review (Low, Medium or High), a criterion based on Question 10 of the Critical Appraisal Skills Programme qualitative quality assessment tool[50]. The assessment concluded that majority of studies (7/9) were found to be of high value to the review[15, 33, 35, 37, 45, 47, 49]. These studies were rated as highly valuable due to the age range of participants fitting directly with the aims of this review and because they reported on intergenerational programs in detail and provided ample evidence to support their findings, facilitating the analytical process for this review. The Biggs et al.[51] and Hernandez and Gomez[46] studies were rated as being of medium value to the review. Biggs et al.[51] was assessed as lacking on detail with regard to the reporting of the findings, whereas Hernandez and Gomez[46] had limited age group relevance to the review aims as the younger age group had an average age of 19.

**Table 2: a priori theories identified after step one**

|                                                                                                                                                                                                             |
|-------------------------------------------------------------------------------------------------------------------------------------------------------------------------------------------------------------|
| Intergenerational programs involving adolescents and older adults improve social connectedness in the older adult group.                                                                                    |
| Intergenerational programs conducted in educational contexts result in positive outcomes in social connectedness for one/both groups.                                                                       |
| Because they are at a similar point in psychosocial development, adolescents and older people are likely to be mutual beneficiaries of intergenerational programs.                                          |
| Intergenerational programs help support meaningful connections for older people who may be socially disconnected within the community, with individuals outside of their normal age and social demographic. |
| Greater generativity is formed through participation in intergenerational programs.                                                                                                                         |
| Intergenerational programs conducted in educational contexts build community connections between generations and across structural community assets like schools.                                           |

When coupled with the *a priori* theories generated from phase one, context mechanism outcome configurations (CMOC) were developed. The CMOC are eight circumstances deemed optimal for the delivery of intergenerational programs involving older adults and adolescents and are hypothesised to improve outcomes in social connectedness. These are summarised in Table 3 below.

**Table 3: Summary of Context Mechanism Outcome Configurations**

| CMOC label and summary-level description                                                                                                                                                                                                                                                                                                                                                                                                                                                                                                                                                                                              | References of included studies |
|---------------------------------------------------------------------------------------------------------------------------------------------------------------------------------------------------------------------------------------------------------------------------------------------------------------------------------------------------------------------------------------------------------------------------------------------------------------------------------------------------------------------------------------------------------------------------------------------------------------------------------------|--------------------------------|
| <p><b>CMOC 1 Understand the participants psychosocial development phase and attitudes towards each other to foster generativity</b></p> <p>Adolescents and older adults are at a similar crossroads in the formation and maintenance of their identity[34] (context). Understanding the developmental phase and held attitudes of the participants (context) supports the design of program training activities (mechanism) and ‘ice breakers’ (mechanisms) that foster reciprocity (mechanism) and are more likely to trigger generativity (outcome) between the generational groups and improve social connectedness (outcome).</p> | All included studies           |
| <p><b>CMOC 2 Use a pedagogic framework to trigger generativity, intercommunity connections and deliver social health outcomes</b></p> <p>Pedagogic frameworks (context) motivate the adolescent to participate in intergenerational programs and achieve a result[35, 45, 48]. Similarly, the older adult is motivated to transfer skills and wisdom and provide support to the adolescent so as they can achieve their goal (mechanism). As a result, social connectedness and attitudes (outcomes) towards the other generational group improve.</p>                                                                                | All included studies           |
| <p><b>CMOC 3 Design the program to be frequent and have a clear structure to support participation and improved social connectedness</b></p> <p>Pedagogic frameworks (context) provide structure. Programs that are co-designed and scheduled frequently allow relationships to form through shared goals and activities (mechanisms). Frequent and carefully structured programs allow for improved social connectedness, and sustainable health and community benefits (outcomes).</p>                                                                                                                                              | All included studies           |
| <p><b>CMOC 4 Conduct the program in community settings to support social health outcomes and build social capital</b></p> <p>Community settings including educational institutions, care homes or existing community groups provide a foundation for engagement (context) when delivering intergenerational programs. Programs that showed a strong connection to the community through their facilitators (mechanism) or the physical environment (mechanism) showed improved sustainability and generalisability for the participants and the broader social capital of the community (outcome).</p>                                | [15, 33, 35, 45-47, 49]        |
| <p><b>CMOC 5 Deliver pre-program training and support participants to ‘break the ice’</b></p> <p>Utilising existing community settings and knowledge of psychosocial development, (contexts), pre-program training (mechanism) and activities that support participants to connect on a more informal level (mechanism) work together to bridge gaps between the generations (outcome).</p>                                                                                                                                                                                                                                           | [15, 33, 35, 45-47, 49]        |
| <p><b>CMOC 6 Identify shared goals between program participants to build reciprocity and support program engagement</b></p> <p>Through use of pedagogic frameworks and existing community links (contexts), the identification of shared goals builds reciprocity (mechanism) between the participants and in turn may trigger benefits including a greater sense of generativity (outcome), improved wellbeing (outcome) and social connectedness (outcome).</p>                                                                                                                                                                     | [15, 33, 35, 45-47, 49]        |
| <p><b>CMOC 7 Include a trained facilitator to promote program participation</b></p>                                                                                                                                                                                                                                                                                                                                                                                                                                                                                                                                                   | [33, 35, 45-47, 49]            |



|                                                                                                                                                                                                                                                                                                                                                                                                                                                                 |                                    |
|-----------------------------------------------------------------------------------------------------------------------------------------------------------------------------------------------------------------------------------------------------------------------------------------------------------------------------------------------------------------------------------------------------------------------------------------------------------------|------------------------------------|
| <p>In a variety of contexts, the inclusion of a program facilitator (mechanism) may support improved social connectedness (outcome). The other key function of a facilitator is to ensure that the participants have had the opportunity to ‘break the ice’ (mechanism) through pre-program training and informal opportunities such as morning tea times.</p>                                                                                                  |                                    |
| <p><b>CMOC 8 Plan inclusive activities that trigger generativity and improve physical, cognitive, psychological and social outcomes</b></p> <p>When programs use existing community connections, include relationship-based activities with a shared goal (mechanisms) and are grounded in a pedagogic framework (contexts), there is improvement in health and social wellbeing (outcome) and a sense of generativity for the older adult group (outcome).</p> | <p>[15, 33, 35, 37, 45-47, 49]</p> |

### **CMOC 1 Understand the participant’s psychosocial development phase and attitudes towards each other to foster generativity and connection**

In the included studies, pre-program psychometric measurement[33, 35, 37, 46], focus groups or interviews[47] and informal gatherings at the beginning of the program[15, 33, 35, 46, 47, 49] were used to understand the demographic and psychosocial characteristics of participants. Psychometric scales that measured attitudes towards ageing, social connectedness, loneliness, generativity and presence of depression were completed pre and post intervention[33, 35, 37, 46]. Pre-program focus groups and interviews were used with both groups[33, 47, 49] to understand participant skills and motivations. This information was used to align participants based on skills and expectations, understand participant relationships with other generations, their attitudes towards ageing and their perceptions of self [49]. Understanding baseline attitudes helped structure programs to promote alternate views of an older person’s capability, foster dialogue and enhance learning between generations.

Evidence from the included studies indicates that using pre-program measures to understand participant demographics, including their psychosocial phase and cognitive and physical abilities leads to a more likely match in participant capability and outcomes that improve social connectedness and generativity.

### **CMOC 2 Use a pedagogic framework to trigger generativity, intercommunity connections and deliver social health outcomes**

Pedagogic or service-learning frameworks support participants to learn together in a real-world context[5, 52] and featured in six of the included studies[33, 35, 46-49]. Studies that involved school students were aged between 13-19 years with 15 years the average age across studies[33, 35, 45, 47, 49]. Two studies[35, 49] involved students completing a report or a community presentation, whilst others involved students completing a small woodwork project[33, 47]. These tasks were curriculum linked[35], motivating adolescent participants to complete the task. Older adults reported they felt needed when they were contributing to adolescent’s learning and

1 acknowledged the adolescent's contribution to their own learning - "*they can teach us the*  
2 *computer and their new language*"[49]  
3  
4

5  
6 Through the use of a pedagogic framework, results showed improved understanding and respect  
7 for the other generation[47, 48] and older adults gained a sense of pride in being able to pass on  
8 their knowledge and wisdom. These findings provide evidence that in pedagogic contexts, where  
9 reciprocity is formed, it is likely that an improvement in perceived social connectedness and  
10 wellbeing will occur for the older adult.  
11  
12  
13  
14

### 15 **CMOC 3 Design the program to be frequent and have a clear structure to support participation** 16 **and improved social connectedness**

#### 17 *Frequency and duration of sessions*

18 Programs that used a pedagogic framework were usually linked to a school term or semester[33,  
19 45-47, 49]. These programs ranged from six to twelve - week blocks, often repeating over school  
20 terms. Programs that were held weekly[15, 33, 35, 46, 47], fortnightly[45, 49] or bi-monthly[48].  
21 Biggs and Knox[48] reported less frequent sessions were chosen to avoid overwhelming the  
22 participants, compared to other participants who requested more frequent and extended  
23 program sessions so they could spend more time together[33, 45, 47, 49].  
24  
25  
26  
27  
28  
29  
30

#### 31 *Structure of sessions*

32 A clear program structure that included pre-training and time for "breaking the ice"[33, 47] was  
33 reported as beneficial. Typically, studies used the session to engage and introduce participants  
34 or complete training and the following weeks to cover different topics or questions relating to  
35 the aim of the study. In the Ostensen[15] study, older adults raised learning goals that formed  
36 the structure for the week ahead. Overall, evidence suggests that having a structured program  
37 that allows frequent interaction between generational participants is more likely to result in  
38 improved social connectedness and optimised health and wellbeing.  
39  
40  
41  
42  
43  
44

### 45 **CMOC 4 Conduct the program in community settings to support social health outcomes and** 46 **build social capital**

47 Intergenerational programs that occur in community settings provide a platform for building social  
48 capital[4, 9, 26]. Four studies conducted programs in residential care facilities using existing  
49 community connections such as local youth clubs and schools that were geographically close by  
50 [15, 35, 48, 49] and two others[33, 46, 47] leveraged local community programs (volunteer  
51 groups). Evidence suggested that community-based programs had greater potential in enhancing  
52 social health outcomes for older adults and generating social capital in the broader community.  
53 In the Biggs and Knox[48] study, older adult participants began attending church with the families  
54 of the adolescents, demonstrating connections beyond the program. Similar results were reported  
55  
56  
57  
58  
59  
60

1  
2 in the de Souza[45] study with older participants reflecting improved mood, physical wellbeing  
3 and a *'feeling of freedom'* (p. 467), through their opportunities to get out of the facility and spend  
4 time with the adolescents in the community. The location, existing relationships between  
5 community organisations and activities that support participants to observe the other generation  
6 playing a role in the community are all positive predictors of a likely improvement in individual  
7 and community social connectedness and wellbeing.  
8  
9

#### 10 11 12 **CMOC 5 Deliver pre-program training and support participants to 'break the ice'**

13 Pre-program training was provided in six of the nine included studies. Training was offered to older  
14 adults and the adolescents[33, 35, 49], to older adults only[33] or to adolescents only[15, 46].  
15 Training included program orientation or the opportunity to learn about the other generation.  
16  
17

18 Where training was provided to both the adolescents and older adults, this appeared to foster  
19 social connections. For example, the adolescents shook the hands of the older gentleman at the  
20 beginning and end of each session. This positive social behaviour was felt by the older men to be  
21 respectful and demonstrated social connectedness between the groups[47]. However, in the  
22 Santini[49] study, despite the pre-program introductory material, students reported that they  
23 required support from teachers and older adult volunteers to overcome their emotions when they  
24 met with the older adults for the first time.  
25  
26

27 The Wilson et al[33] program provided training to the older adult mentors only. This training  
28 provided the mentors with disability awareness training via videos. Despite this, it was highlighted  
29 by the older adults that they would have liked to have been more prepared for working with the  
30 adolescents with intellectual disability. Two studies provided training to adolescents only[15, 46]  
31 however did not report on the impact of this training.  
32  
33

34 In studies where no formal pre-program training was provided, results were mixed in relation to  
35 the impact on the program. In the Kessler and Staudinger[37] study, the randomised control trial  
36 methodology required pre-program blinding. In the Biggs and Knox[48] study, the participants  
37 were already involved in an existing Scouts program, so it is assumed that pre-program education  
38 was included in Scout club activities, however, this was not reported by the authors. Parents of  
39 the adolescents in the Biggs and Knox[48] raised concern about their children's reactions to  
40 residents with dementia or if a resident died. There were also reports from the residents and  
41 parents that boundaries and behaviours were not respected by the adolescent participants. These  
42 examples indicate a role for pre-program training to reduce fears and provide education. Where  
43 training or opportunities to interact were sub-optimal or missing, participants highlighted limited  
44 opportunities to 'get to know' each other or feel prepared for the program[33, 45]. If comfort or  
45 confidence in the program is not established, participants may not participate[45] or be reluctant  
46  
47  
48  
49  
50  
51  
52  
53  
54  
55  
56  
57  
58  
59  
60

1  
2 to participate again[33]. This has broader implications for the sustainability of program outcomes,  
3 particularly those that aim to enhance social capital or galvanise links between community groups.  
4

5  
6 **CMOC 6 Identify shared goals between program participants to build reciprocity and support**  
7 **program engagement**  
8

9 By understanding the shared aims of participants, reciprocity is nurtured, participants are more  
10 motivated, and generativity is triggered. Where participants were involved in program design[46,  
11 49] as well as iteratively throughout the course of the program[15, 48] the program was more  
12 person centred, enhanced reciprocal behaviours and improved outcomes.  
13  
14

15  
16 The Santini[49] study used an action participatory research approach with active older adult  
17 volunteers, social workers and teachers and Hernandez and Gonzalez[46] used a co-design  
18 approach through adolescent students designing an exercise program for older adults that was  
19 delivered with support from lecturers and trained facilitators over 32 sessions. Both generations  
20 benefited in these programs, with results indicating a positive shift in age related stereotypes  
21 when older adults and adolescents interacted as part of the program.  
22  
23

24  
25 In programs where there was a shared goal from the outset there was greater improvement in  
26 social connectedness[33, 35, 47, 48], reduced markers for depression[46] and stereotypical  
27 attitudes towards the older generation[48]. The included studies demonstrate that creating  
28 reciprocity drives generative behaviour. Reciprocity and generativity combined leads to improved  
29 social connectedness and health and wellbeing outcomes for the individual and the community  
30 broadly.  
31  
32

33  
34 **CMOC 7 Include a trained facilitator to promote participation**  
35  
36

37  
38 Facilitation is the act of supporting and enabling a group to meet its objectives (and release its full  
39 potential) by fostering conditions that respects and encourages contributions by all members of  
40 the group[53]. Facilitation was used in seven of the included studies. The facilitators were trained  
41 professionals including teachers[35, 49], university staff[46], fitness instructors[46], health  
42 professionals[15, 33, 48], community leaders[48] and youth workers[47]. In the Santini[49] study,  
43 active older volunteers also played a facilitation role. Studies that included a facilitator resulted in  
44 greater participant interaction and improved program outcomes[33, 47, 49]. In the Wilson et al  
45 study, the youth worker that facilitated the program was described as responsible for “*keeping us*  
46 *on track*”[47] and was pivotal in prompting participation between the groups, for example at  
47 afternoon tea breaks.  
48  
49

50  
51 In the study involving girl Scout groups[48], the troop leaders were trained social workers. Whilst  
52 their individual experiences were not reported in the findings, the role they played in bringing  
53 together individuals connected to existing community settings in girl Scouts, residential aged care  
54  
55  
56  
57  
58  
59  
60

1 and volunteer groups was fundamental in the program longevity and results. In four studies, active  
2 adult[33, 47, 49] and adolescent[15] volunteers were recruited from local community volunteer  
3 groups and provided additional program facilitation support that likely enhanced positive  
4 outcomes in community engagement and social connectedness.  
5  
6  
7

8  
9 Conversely, in studies where the facilitation was reported as being sub-optimal[33] or absent[45],  
10 the participants and the authors highlighted that greater support from the teachers, researchers  
11 or 'monitors' would have enhanced interactions between the generational groups. If facilitation  
12 is absent or lacking, participants may feel frustrated or unsupported, in turn causing participant  
13 disengagement, attrition or an unintended triggering of age-based stereotypes or perceived  
14 loneliness[49]. Trained facilitation supports improved connectedness between participants and  
15 when delivered within community and pedagogic contexts, favourable outcomes in generativity,  
16 social connectedness, and social capital.  
17  
18  
19  
20  
21  
22

### 23 **CMOC 8 Plan inclusive activities that trigger generativity and improve physical, cognitive,** 24 **psychosocial, and social outcomes**

25  
26 Included studies reported on programs that provided relationship-based inclusion[35, 45, 48, 49]  
27 and activity-based inclusion[15, 33, 46, 47] opportunities for participants.  
28  
29  
30

31 Relationship-based inclusion:

32 If there is limited opportunity for relationship-based inclusion, adolescents and older adults are  
33 at risk of not experiencing meaningful social connection[35]. Feeling included by peers and the  
34 broader community promotes generativity and in turn improves wellbeing in both age  
35 groups[23, 35]. Several programs[35, 45, 48, 49] used relationship-based inclusion activities  
36 such as reminiscence (sharing old photos or learning about what jobs older people used to do) to  
37 create reciprocity between older adults and adolescents. This was also a mechanism to improve  
38 physical, cognitive, and psychological health, and in turn social connectedness. A marker of  
39 sustained relationships was demonstrated by the adolescents continuing to connect with older  
40 adults after the program[35, 49], including volunteering at a local community organisation with  
41 older people.  
42  
43  
44  
45  
46  
47  
48  
49

50 Activity-based inclusion:

51 Studies that used activity-based inclusion such as exercise programs[46], digital literacy training  
52 with an iPad[15] or woodwork construction[33, 47] also reported improved outcomes in  
53 physical, cognitive, psychological and social domains, including social connectedness. In the  
54 studies set in Men's Shed's the young adults were mentored by the older men in occupational  
55 activities, with both groups reporting the activities provided the opportunity to connect, whilst  
56 learning new skills and doing "*something with our hands*"[47]. Young adults with intellectual  
57  
58  
59  
60

1 disability commented that the Men's Shed was a unique learning environment - "*they made me*  
2 *feel like part of the group*" and that they "*felt accepted*"[33]. Older adults supported to use a  
3 tablet device[15] demonstrated improved social outcomes as they were able to connect with  
4 family in other locations or the outside community through news applications or by tracking  
5 weather. Nurses in the care facility reported a change in social behaviour in the participants  
6 using iPads, taking more initiative, presenting as less anxious and being more socially active. In  
7 the Hernandez and Gonzalez[46] study, the interaction between adolescents and older people  
8 showed statistically significant improvement in depression scores and stereotypical attitudes in  
9 the older adult group. A comparison group led by the adult trainer resulted in a less significant  
10 change in depression scores in the older adults (Group 1 with adolescents=  $p < .001$ ; Group 2 led  
11 by adult trainer =  $p < .008$ ). The control group (who attended the local social centre but did not  
12 interact with the adolescents or participate in exercise sessions) showed a statistically significant  
13 increase in depressive symptoms ( $p < .001$ ). The evidence supports activities that provide the  
14 participating generations with the opportunity to share time, reminisce and develop  
15 relationships are powerful mechanisms for triggering generativity and social connectedness.  
16  
17  
18  
19  
20  
21  
22  
23  
24  
25  
26  
27

### 28 **Logic model**

29 The aim of this review is to identify the circumstances in which social connectedness is optimised  
30 for older adults when taking part in intergenerational interventions with adolescents. The logic  
31 model below represents the relationships between program activities and improved social  
32 connectedness for older adults. As demonstrated through the CMOC, the act of two generations  
33 coming together in familiar community-based contexts with a shared purpose, resulted in  
34 strengthened relationships and community connections. Several participants in the included  
35 studies spoke about the benefit of having an opportunity to 'meet and greet' for example by  
36 sharing an afternoon tea as part of the program[33, 35, 47-49].  
37  
38  
39  
40  
41  
42

43 This logic model (presented in Figure 2 below) uses a nested visual to represent an optimal  
44 intergenerational program to improve social connectedness in older adults. The circumstances  
45 being the outer circle, with the mechanisms within that, driving the outcomes at the core.  
46  
47  
48  
49  
50  
51  
52  
53  
54  
55  
56  
57  
58  
59  
60

1  
2  
3  
4  
5  
6  
7  
8  
9  
10  
11  
12  
13  
14  
15  
16  
17  
18  
19  
20  
21  
22  
23  
24  
25  
26  
27  
28  
29  
30  
31  
32  
33  
34  
35  
36  
37  
38  
39  
40  
41  
42  
43  
44  
45  
46

**\*Insert here\_Figure 2: Logic model**

For peer review only

## DISCUSSION

Evidence from the included studies reveals how intergenerational programs involving adolescents can address issues of social disconnectedness in older adults. This review identifies how and why intergenerational programs work, for whom and in what circumstances. Broadly, the CMOC cover four main themes - 1) psychosocial and mental health, 2) physical and cognitive health, 3) program design and structure and 4) community engagement and social capital.

### **Psychosocial and mental health**

Providing opportunities for older adults to participate, without being infantilized or inequitably treated is highlighted by the included studies and others as a mechanism for improving reciprocity and generativity[20, 37, 54]. The opportunity to participate in an intergenerational program saw older adults improve their own self-image and stereotypical view of old age and prove to themselves that they still had something to offer the community and the younger generation[45, 46, 49]. Included programs that created opportunities for informal, relationship-based activities which triggered generativity, for example promoting conversation between the generational groups, were of greatest benefit to psycho-social health[35, 45, 49].

### **Physical and cognitive health**

The impact of intergenerational programs on broader health outcomes, including cognitive health has been previously reported[14, 55]. The connections between social, cognitive and physical health are well known, particularly in high-risk populations like older adults[56-58]. In this review, interventions that promoted the older adult as wise or expert[33, 35, 37, 47, 48] showed improvement in both perceived and measured cognitive performance. Kessler and Staudinger[37] showed improvement in speed of processing and word fluency when older adults were paired with an adolescent and asked to solve a 'life problem'. Qualitative evidence from included studies reported improved physical health in older adults as a result of their involvement in the intergenerational program, including increased energy[33] reduced pain[49] and increased movement[45].

### **Program design and structure**

A range of designs and structures are reported in the intergenerational program literature. Intergenerational programs embedded within pedagogic contexts are supported by existing literature[26, 59, 60] and were featured in many of the included studies. Several studies support the need for in depth, sustainable and accessible intergenerational programs to address social health issues[19, 61]. As highlighted by Cattani et al.,[62] programs that engage adults in the planning and design of the interaction are most effective. This was seen in the Ostensen[15] study and the Wilson et al.,[33] study that highlighted the use of co-design to optimise outcomes.



1  
2  
3  
4  
5  
6  
7  
8  
9  
10  
11  
12  
13  
14  
15  
16  
17  
18  
19  
20  
21  
22  
23  
24  
25  
26  
27  
28  
29  
30  
31  
32  
33  
34  
35  
36  
37  
38  
39  
40  
41  
42  
43  
44  
45  
46  
47  
48  
49  
50  
51  
52  
53  
54  
55  
56  
57  
58  
59  
60

Martins et al.,[31] in a review of intergenerational programs also highlighted the benefit of weekly or fortnightly intergenerational meetings to create bonds between participants.

Several of the included studies highlighted the importance of informal and formal program structures to build a foundation for connection. Several interventions leveraged existing local community connections and pre – program training was shown to support participation[33, 45, 49]. However, where complex demographics exist, additional program support may be required[33, 45, 49].

### **Community engagement and social capital**

Programs set in the community that leveraged existing community connections were more likely to promote social connectedness. Individuals already engaged with the community in a volunteer capacity were participants, and in some cases facilitators of the program. Other reviews[21] support the inclusion of volunteers as it is a cost effective way to deliver programs and promote volunteerism- a key element for enhancing social capital. Volunteers were used in the included studies to support program delivery and participant recruitment via community organisations like Rotary or Scouts[15, 33, 47-49]. Adolescents also witnessed volunteer ‘models’ and were interested in volunteerism beyond the program[15, 35, 49].

### **Strengths and limitations of this review**

This realist review explored intergenerational programs that specifically involved adolescents and their impact on social connectedness in older adults and developed inclusion and exclusion criteria to reflect this aim. Whilst these criteria generated a targeted group of studies for review, there may have been additional studies missed. The included studies showed some collective limitations including a lack of participant diversity in regard to gender and rurality. From the information reported, most studies were conducted in metropolitan environments. The importance of building capacity in rural communities to protect the social health of older adults is supported by Hodgkin et al.[6] and this lacking insight is one limitation of this review. In regards to gender, three studies specifically recruited based on gender given they were located in Men’s sheds[33, 47] or focused on girls scouts[48], however in other studies where gender did not appear to be a structural factor, there was a greater proportion of women over men who participated. This is a possible limitation of the review along with the limited participation of older adults with cognitive impairment, particularly in quantitative measurement[15, 35, 48]. There were also noted limitations in the quality of some studies with a paucity of evidence from the intervention, however these studies remained included in the review given their value to the overall review question and the commitment in realist methodology not to exclude solely based on quality of evidence[38]. An additional limitation is that only studies published in English were considered.

1  
2  
3  
4 This review is however strengthened by its specific focus and that it is the first realist review to  
5 explore the impact of intergenerational programs specifically involving adolescents on social  
6 connectedness in older adults. In addition, the review included a variety of study methods  
7 including one randomised control trial. The inclusion of evidence developed using a variety of  
8 methods is supported by the realist review methodological standards as it provides a broad view  
9 of existing literature and evidence is included based on its value and contribution to the review  
10 aim, rather than singularly on methodological type. As a result, the included studies report on a  
11 variety of different programs from several major continents. Whilst this heterogeneity may be  
12 viewed as a limitation, the realist method supports using a wide range of evidence to  
13 understand the circumstances in which complex interventions deliver an intended outcome. The  
14 review may have been further strengthened by the opportunity to test the program theories and  
15 logic with stakeholder groups.

### 24 25 **Implications for practice and future research**

26 This review has provided a logic model that is ready to use by clinicians, program managers and  
27 policy makers in the design and implementation of community based intergenerational  
28 interventions. This review has implications for targeting physical, social, and mental health in older  
29 adults, as well as exploring opportunities for the role of intergenerational programs in adolescent  
30 health. Furthermore, the program theory provides a suggested approach for designing programs  
31 with a broader system lens. Previous literature has also supported the use of intergenerational  
32 programs[63], in particular those with a social health focus, to counter loneliness[64], influence  
33 age related health outcomes[17] and reduce costs associated with increased care needs in older  
34 age[15, 65].

35 The review also provides support for the inclusion of intergenerational programs into the  
36 curriculum to influence adolescent career choices and to improve attitudes towards older  
37 people[35, 45, 49]. Included studies also called for intergenerational programs to be a “systematic  
38 component of care provision”[49] for older adults living in residential aged care, including  
39 additional resources, changes to models of care and staff training[15].

40  
41  
42 Future research where intergenerational interventions are 1) designed using the program theory  
43 as articulated within the logic model and 2) tested with stakeholders, may support further  
44 understanding what works for whom, and in what circumstances. Realist evaluation or other  
45 published frameworks like the 6-SQUID model[66, 67] are methodological options for future  
46 projects. This style of participatory research generates community will and engagement and  
47 supports sustainability without major resource investment, as the community itself ‘owns’ and is  
48  
49  
50  
51  
52  
53  
54  
55  
56  
57  
58  
59  
60

1 committed to the intervention they have designed. Future research would also benefit from  
2 addressing the same theory in comparative or specific settings[39], such as in aged care settings  
3 or community groups like Men's sheds.  
4  
5  
6  
7

## 8 **CONCLUSION**

9  
10 This review has identified the circumstances in which social connectedness is optimised for older  
11 adults when taking part in intergenerational interventions with adolescents. Findings have  
12 provided a logic model outlining how intergenerational programs involving adolescents are likely  
13 to improve social connectedness for older adults and builds on the evidence that social  
14 connectedness and social networks are protective for immunity, reduced depression rates and a  
15 reduced risk of frailty[16, 56, 68].  
16  
17  
18  
19

20 In addition to the psychosocial development theory, this review has uncovered the optimal  
21 circumstances that promote social connectedness for older adults. These include setting programs  
22 in the community, including a trained facilitator, leveraging a pedagogic framework and finding  
23 shared goals between participants. Structural elements such as pre-program training and  
24 frequency of sessions was shown to be important in delivering relationship bonds between older  
25 adults and adolescents, that trigger generative behaviours and greater perceived social  
26 connectedness. Intergenerational programs involving adolescents are a possible solution for  
27 enhancing social connectedness and health outcomes for older adults.  
28  
29  
30  
31  
32  
33  
34  
35  
36  
37  
38  
39  
40  
41  
42  
43  
44  
45  
46  
47  
48  
49  
50  
51  
52  
53  
54  
55  
56  
57  
58  
59  
60

**Authors' contributions**

JS, HV and DA conceived of the project and contributed to the development of the manuscript. JS led the review, HV and DA were the co-reviewers. All authors read and approved the final manuscript.

**Conflict of interest declaration**

The authors declare no conflict of interest and take sole responsibility for the content of this article.

**Data sharing statement**

All included articles are available publicly. The data extracted from these articles can be made available upon request.

**Funding**

This research was undertaken in part fulfilment of a Master of Public Health degree by JS and did not receive any specific funding.

**Ethics Approval**

This study did not require ethical approval

**Acknowledgments**

We would like to acknowledge support from the La Trobe University library staff in conducting initial literature search. We would also like to thank the stakeholders who gave their time to participate in the early stages of this review.

## REFERENCES

1. Grenade L, Boldy D. Social isolation and loneliness among older people: issues and future challenges in community and residential settings. *Australian Health Review*. 2008;32(3):468-78.
2. White H, McConnell E, Clipp E, et al. A randomized controlled trial of the psychosocial impact of providing internet training and access to older adults. *Aging & mental health*. 2002;6(3):213-21.
3. Morton TA, Wilson N, Haslam C, et al. Activating and Guiding the Engagement of Seniors With Online Social Networking: Experimental Findings From the AGES 2.0 Project. *Journal of Aging and Health*. 2018;30(1):27-51.
4. Haslam C. *The New Psychology of Health : Unlocking the Social Cure*. Jetten J, Cruwys T, Dingle G, Haslam A, Haslam C, editors: Florence : Routledge; 2018.
5. Andreoletti C, Howard JL. Bridging the generation gap: Intergenerational service-learning benefits young and old. *Gerontology and Geriatrics Education*. 2018;39(1):46-60.
6. Hodgkin SP, Warburton J, Hancock S. Predicting wellness among rural older Australians: a cross-sectional study. *Rural and remote health*. 2018;18(3):4547.
7. Mellor D, Firth L, Moore K. Can the Internet Improve the Well-being of the Elderly? *Ageing International*. 2008;32(1):25-42.
8. Nycyk M, Redsell M. Intergenerational Relationships and Community Computer Training: Overcoming the Digital Divide. *Journal of Intergenerational Relationships*. 2011;9(1):85-9.
9. Coll-Planas L, Nyqvist F, Puig T, et al. Social capital interventions targeting older people and their impact on health: a systematic review. *J Epidemiol Community Health*. 2017;71(7):663-72.
10. Kaplan M, Sanchez M, Hoffman J. Intergenerational Strategies for Sustaining Strong Communities. *Intergenerational Pathways to a Sustainable Society*. Cham: Springer International Publishing; 2017. p. 109-39.
11. Dickens AP, Richards SH, Greaves CJ, et al. Interventions targeting social isolation in older people: a systematic review. *BMC Public Health*. 2011;11(1):647.
12. Hagan R, Manktelow R, Taylor BJ, et al. Reducing loneliness amongst older people: a systematic search and narrative review. *Aging Ment Health*. 2014;18(6):683-93.
13. Choi M, Kong S, Jung D. Computer and internet interventions for loneliness and depression in older adults: a meta-analysis. *Healthcare informatics research*. 2012;18(3):191.
14. Ronzi S, Orton L, Pope D, et al. What is the impact on health and wellbeing of interventions that foster respect and social inclusion in community-residing older adults? A systematic review of quantitative and qualitative studies. *Syst*. 2018;7(1):26.
15. Ostensen E, Gjevjon ER, Oderud T, et al. Introducing Technology for Thriving in Residential Long-Term Care. *J Nurs Scholarsh*. 2017;49(1):44-53.
16. Berkman LF, Glass T, Brissette I, et al. From social integration to health: Durkheim in the new millennium. *Social science & medicine (1982)*. 2000;51(6):843-57.
17. Glass TA, De Leon CFM, Bassuk SS, et al. Social Engagement and Depressive Symptoms in Late Life: Longitudinal Findings. *Journal of aging and health*. 2006;18(4):604-28.
18. Buffel T, Phillipson C. Can global cities be 'age-friendly cities'? *Urban development and ageing populations*. *Cities*. 2016;55:94-100.
19. Gualano MR, Voglino G, Bert F, et al. The impact of intergenerational programs on children and older adults: a review. *International Psychogeriatrics*. 2018;30(4):451-68.
20. Bagnasco A, Hayter M, Rossi S, et al. Experiences of participating in intergenerational interventions in older people's care settings: A systematic review and meta-synthesis of qualitative literature. *J Adv Nurs*. 2020;76(1):22-33.
21. Springate I, Atkinson, M., & Martin, K. *Intergenerational Practice: a Review of the Literature*. 2008.
22. Gamliel T, Gabay N. Knowledge Exchange, Social Interactions, and Empowerment in an Intergenerational Technology Program at School. *Educational Gerontology*. 2014;40(8):597-617.

23. Kaplan M. The benefits of intergenerational community service projects: Implications for promoting intergenerational unity, community activism, and cultural. *Journal of Gerontological Social Work*. 1997;27(3):211-28.
24. Newman S, Hatton-Yeo A. Intergenerational learning and the contributions of older people. *Ageing horizons*. 2008;8(10):31-9.
25. Schroeder K, Ratcliffe SJ, Perez A, et al. Dance for Health: An Intergenerational Program to Increase Access to Physical Activity. *Journal of Pediatric Nursing*. 2017;37:29-34.
26. Kaplan MS. Intergenerational programs in schools: Considerations of form and function. *International Review of Education*. 2002;48(5):305-34.
27. Leedahl SN, Brasher MS, Estus E, et al. Implementing an interdisciplinary intergenerational program using the Cyber Seniors® reverse mentoring model within higher education. *Gerontology & geriatrics education*. 2018:1-19.
28. Breck BM, Dennis CB, Leedahl SN. Implementing reverse mentoring to address social isolation among older adults. *Journal of Gerontological Social Work*. 2018:1-13.
29. Zhong S, Lee C, Foster MJ, et al. Intergenerational communities: A systematic literature review of intergenerational interactions and older adults' health-related outcomes. *Social science & medicine*. 2020;264:113374.
30. Giraudeau C, Bailly N. Intergenerational programs: What can school-age children and older people expect from them? A systematic review. *European Journal of Ageing*. 2019:1-14.
31. Martins T, Midão L, Martinez Veiga S, et al. Intergenerational programs review: Study design and characteristics of intervention, outcomes, and effectiveness. *Journal of Intergenerational Relationships*. 2019;17(1):93-109.
32. Phang JK, Kwan YH, Yoon S, et al. Digital Intergenerational Program to Reduce Loneliness and Social Isolation Among Older Adults: Realist Review. *JMIR aging*. 2023;6(1):e39848.
33. Wilson NJ, Cordier R, Ciccarelli M, et al. Intergenerational mentoring at Men's Sheds: A feasibility study. *J Appl Res Intellect Disabil*. 2018;31(1):e105-e17.
34. Erikson EH. *Childhood and society*. Rev. ed.. ed. London: London Vintage; 1995.
35. Knight T, Skouteris H, Townsend M, et al. The act of giving: a pilot and feasibility study of the My Life Story programme designed to foster positive mental health and well-being in adolescents and older adults. *International Journal of Adolescence and Youth*. 2017;22(2):165-78.
36. Zacher H, Esser L, Bohlmann C, et al. Age, social identity and identification, and work outcomes: a conceptual model, literature review, and future research directions. *Work, Aging and Retirement*. 2019;5(1):24-43.
37. Kessler E, Staudinger UM. Intergenerational potential: effects of social interaction between older adults and adolescents. *Psychology & Aging*. 2007;22(4):690-704.
38. Wong G, Greenhalgh T, Westhorp G, et al. RAMESES publication standards: realist syntheses. *BMC Med*. 2013;11(1):21.
39. Pawson R, Greenhalgh T, Harvey G, et al. Realist review--a new method of systematic review designed for complex policy interventions. *Journal of health services research & policy*. 2005;10 Suppl 1:21.
40. Pawson R. *Evidence-based policy: a realist perspective*: sage; 2006.
41. Rycroft-Malone J, McCormack B, Hutchinson A, et al. Realist synthesis: illustrating the method for implementation research. *Implement Sci*. 2012;7(1):33.
42. Wong G, Westhorp G, Manzano A, et al. RAMESES II reporting standards for realist evaluations.(Report). *BMC Med*. 2016;14(1).
43. Long A. Evaluative tool for mixed method studies. University of Leeds, School of Healthcare[online]. 2005;24:2017.
44. Critical Appraisal Skills Programme (CASP). *CASP qualitative checklists* [online]. 2018.
45. de Souza EM. Intergenerational interaction in health promotion: a qualitative study in Brazil. *Rev Saude Publica*. 2003;37(4):463-9.



- 1
- 2
- 3
- 4 46. Hernandez CR, Gonzalez MZ. Effects of intergenerational interaction on aging. *Educational Gerontology*. 2008;34(4):292-305.
- 5
- 6 47. Wilson NJ, Cordier R, Wilson Whatley L. Older male mentors' perceptions of a Men's Shed intergenerational mentoring program. *Australian Occupational Therapy Journal*. 2013;60(6):416-26.
- 7
- 8 48. Biggs MJG, Knox KS. Lessons Learned from an Intergenerational Volunteer Program: A Case Study of a Shared-Site Model. *Journal of Intergenerational Relationships*. 2014;12(1):54-68.
- 9
- 10 49. Santini S, Tombolesi V, Baschiera B, et al. Intergenerational Programs Involving Adolescents, Institutionalized Elderly, and Older Volunteers: Results from a Pilot Research-Action in Italy. *BioMed Research International*. 2018:1-14.
- 11
- 12
- 13 50. Programme CAS. CASP qualitative checklist. 2018.
- 14
- 15 51. Biggs S, Lowenstein A. Generational intelligence a critical approach to age relations 2013. 1-181 p.
- 16
- 17 52. Kaplan MS. School-based intergenerational programs: Citeseer; 2001.
- 18 53. Affairs IoC. What is facilitation? 2019 [cited 2022 October]. Available from: <https://ica-uk.org.uk/what-we-mean-by-facilitation/>.
- 19
- 20 54. Salari SM. Intergenerational partnerships in adult day centers: Importance of age-appropriate environments and behaviors. *The Gerontologist*. 2002;42(3):321-33.
- 21
- 22 55. Harris PB, Caporella CA. An Intergenerational Choir Formed to Lessen Alzheimer's Disease Stigma in College Students and Decrease the Social Isolation of People With Alzheimer's Disease and Their Family Members: A Pilot Study. *American Journal of Alzheimer's Disease & Other Dementias*. 2014;29(3):270-81.
- 23
- 24
- 25
- 26 56. Feng Z, Lugtenberg M, Franse C, et al. Risk factors and protective factors associated with incident or increase of frailty among community-dwelling older adults: A systematic review of longitudinal studies. *PLoS ONE*. 2017;12(6):e0178383.
- 27
- 28
- 29
- 30 57. Gleibs IH, Haslam C, Haslam SA, et al. Water clubs in residential care: Is it the water or the club that enhances health and well-being? *Psychology & health*. 2011;26(10):1361-77.
- 31
- 32 58. Sakurai R, Yasunaga M, Murayama Y, et al. Long-term effects of an intergenerational program on functional capacity in older adults: Results from a seven-year follow-up of the REPRINTS study. *Archives of Gerontology and Geriatrics*. 2016;64:13-20.
- 33
- 34
- 35 59. Whitehouse P, Bendezu E, Fallcreek S, et al. Intergenerational community schools: a new practice for a new time. *Educational Gerontology*. 2000;26(8):761-70.
- 36
- 37 60. Dauenhauer J, Steitz DW, Cochran LJ. Fostering a new model of multigenerational learning: Older adult perspectives, community partners, and higher education. *Educational Gerontology*. 2016;42(7):483-96.
- 38
- 39 61. Murayama Y, Murayama H, Hasebe M, et al. The impact of intergenerational programs on social capital in Japan: a randomized population-based cross-sectional study. *BMC Public Health*. 2019;19(1):1-9.
- 40
- 41
- 42 62. Cattan M, White M, Bond J, et al. Preventing social isolation and loneliness among older people: a systematic review of health promotion interventions. *Ageing and Society*. 2005;25(01):41-67.
- 43
- 44
- 45 63. Radford K, Gould R, Vecchio N, et al. Unpacking intergenerational (IG) programs for policy implications: A systematic review of the literature. *Journal of Intergenerational Relationships*. 2018;16(3):302-29.
- 46
- 47 64. Price B. Approaches to counter loneliness and social isolation. *Nursing Older People*. 2015;27(7):31-9.
- 48
- 49 65. Ferguson L. Tackling loneliness in older age – why we need action by all ages. *Quality in Ageing & Older Adults*. 2012;13(4):264-9.
- 50
- 51 66. Belford M, Robertson T, Jepson R. Using evaluability assessment to assess local community development health programmes: a Scottish case-study. *BMC Medical Research Methodology*. 2017;17(1):70.
- 52
- 53
- 54
- 55
- 56
- 57
- 58
- 59
- 60

- 67. Hartley JE, McAteer J, Doi L, et al. CARE: The development of an intervention for kinship carers with teenage children. *Qualitative Social Work*. 2018;1473325018783823.
- 68. Soysal P, Veronese N, Thompson T, et al. Relationship between depression and frailty in older adults: A systematic review and meta-analysis. *Ageing Res Rev*. 2017;36:78-87.

For peer review only

1  
2  
3  
4  
5  
6  
7  
8  
9  
10  
11  
12  
13  
14  
15  
16  
17  
18  
19  
20  
21  
22  
23  
24  
25  
26  
27  
28  
29  
30  
31  
32  
33  
34  
35  
36  
37  
38  
39  
40  
41  
42  
43  
44  
45  
46  
47  
48  
49  
50  
51  
52  
53  
54  
55  
56  
57  
58  
59  
60



Figure 1: Flow diagram

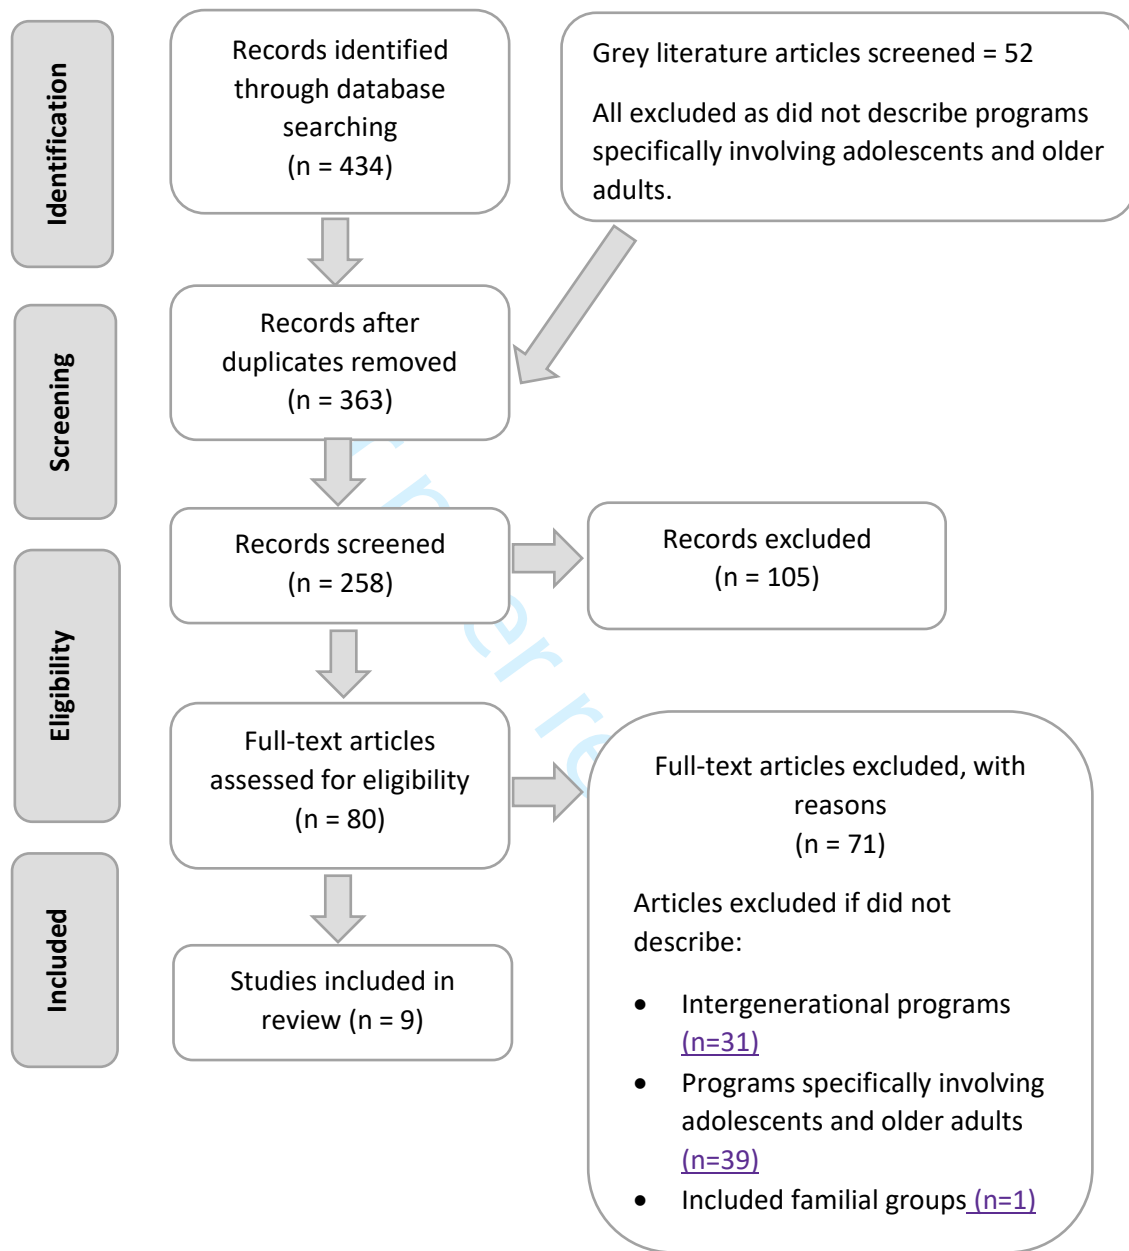

1  
2  
3  
4  
5  
6  
7  
8  
9  
10  
11  
12  
13  
14  
15  
16  
17  
18  
19  
20  
21  
22  
23  
24  
25  
26  
27  
28  
29  
30  
31  
32  
33  
34  
35  
36  
37  
38  
39  
40  
41  
42  
43  
44  
45  
46

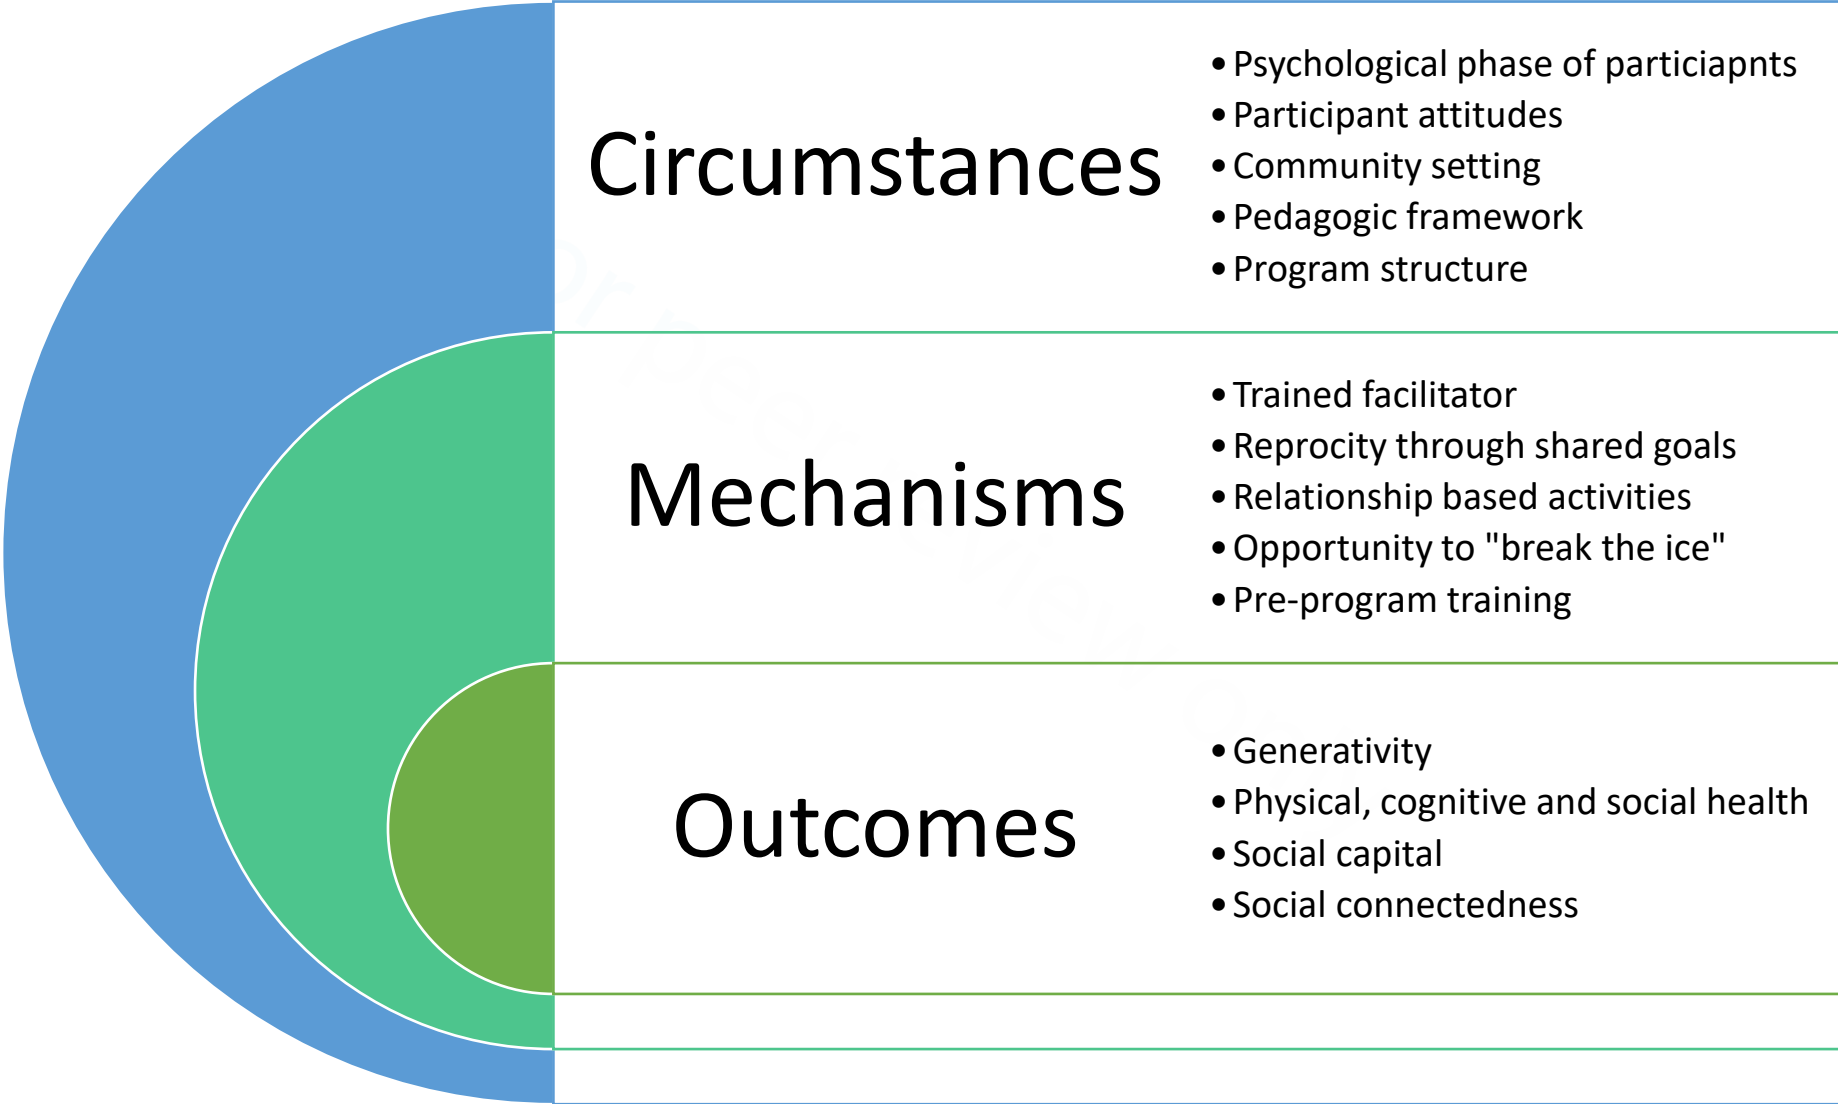

1  
2  
3  
4  
5  
6  
7  
8  
9  
10  
11  
12  
13  
14  
15  
16  
17  
18  
19  
20  
21  
22  
23  
24  
25  
26  
27  
28  
29  
30  
31  
32  
33  
34  
35  
36  
37  
38  
39  
40  
41  
42  
43  
44  
45  
46

For peer review only

## RAMESES checklist for reporting a realist synthesis

From Wong et al.: RAMESES publication standards: realist syntheses. BMC Medicine 2013 11:21. doi: 10.1186/1741-7015-11-21

<https://bmcmmedicine.biomedcentral.com/articles/10.1186/1741-7015-11-21>

| TITLE        |                                       |                                                                                                                                                                                                                                                                                                                                                                                                                       | Reported in document<br>Y/N/Unclear | Page number |
|--------------|---------------------------------------|-----------------------------------------------------------------------------------------------------------------------------------------------------------------------------------------------------------------------------------------------------------------------------------------------------------------------------------------------------------------------------------------------------------------------|-------------------------------------|-------------|
|              |                                       | In the title, identify the document as a realist synthesis or review                                                                                                                                                                                                                                                                                                                                                  | Y                                   | 1           |
| ABSTRACT     |                                       |                                                                                                                                                                                                                                                                                                                                                                                                                       |                                     |             |
|              |                                       | While acknowledging publication requirements and house style, abstracts should ideally contain brief details of: the study's background, review question or objectives; search strategy; methods of selection, appraisal, analysis and synthesis of sources; main results; and implications for practice.                                                                                                             | Y                                   | 2           |
| INTRODUCTION |                                       |                                                                                                                                                                                                                                                                                                                                                                                                                       |                                     |             |
|              | Rationale for review                  | Explain why the review is needed and what it is likely to contribute to existing understanding of the topic area.                                                                                                                                                                                                                                                                                                     | Y                                   | 6           |
|              | Objectives and focus of review        | State the objective(s) of the review and/or the review question(s). Define and provide a rationale for the focus of the review.                                                                                                                                                                                                                                                                                       | Y                                   | 6           |
|              | Ethical approval                      | State whether the project required and obtained ethical approval from the relevant authorities, with details.                                                                                                                                                                                                                                                                                                         | Y                                   | 10          |
| METHODS      |                                       |                                                                                                                                                                                                                                                                                                                                                                                                                       |                                     |             |
|              | Changes in the review process         | Any changes made to the review process that was initially planned should be briefly described and justified.                                                                                                                                                                                                                                                                                                          | N (no changes made)                 | n/a         |
|              | Rationale for using realist synthesis | Explain why realist synthesis was considered the most appropriate method to use.                                                                                                                                                                                                                                                                                                                                      | Y                                   | 6 to 7      |
|              | Scoping the literature                | Describe and justify the initial process of exploratory scoping of the literature.                                                                                                                                                                                                                                                                                                                                    | Y                                   | 7           |
|              | Searching processes                   | While considering specific requirements of the journal or other publication outlet, state and provide a rationale for how the iterative searching was done. Provide details on all the sources accessed for information in the review. Where searching in electronic databases has taken place, the details should include, for example, name of database, search terms, dates of coverage and date last searched. If | Y                                   | 9           |

|                   |                                                       |                                                                                                                                                                                                                                                                                                                                                                                         |   |               |
|-------------------|-------------------------------------------------------|-----------------------------------------------------------------------------------------------------------------------------------------------------------------------------------------------------------------------------------------------------------------------------------------------------------------------------------------------------------------------------------------|---|---------------|
|                   |                                                       | individuals familiar with the relevant literature and/or topic area were contacted, indicate how they were identified and selected.                                                                                                                                                                                                                                                     |   |               |
| 9                 | Selection and appraisal of documents                  | Explain how judgements were made about including and excluding data from documents, and justify these.                                                                                                                                                                                                                                                                                  | Y | 8 to 9        |
| 10                | Data extraction                                       | Describe and explain which data or information were extracted from the included documents and justify this selection.                                                                                                                                                                                                                                                                   | Y | 6             |
| 11                | Analysis and synthesis processes                      | Describe the analysis and synthesis processes in detail. This section should include information on the constructs analyzed and describe the analytic process.                                                                                                                                                                                                                          | Y | 10            |
| <b>RESULTS</b>    |                                                       |                                                                                                                                                                                                                                                                                                                                                                                         |   |               |
| 12                | Document flow diagram                                 | Provide details on the number of documents assessed for eligibility and included in the review with reasons for exclusion at each stage as well as an indication of their source of origin (for example, from searching databases, reference lists and so on). You may consider using the example templates (which are likely to need modification to suit the data) that are provided. | Y | Figure 1      |
| 13                | Document characteristics                              | Provide information on the characteristics of the documents included in the review.                                                                                                                                                                                                                                                                                                     | Y | Table 2       |
| 14                | Main findings                                         | Present the key findings with a specific focus on theory building and testing.                                                                                                                                                                                                                                                                                                          | Y | Page 15 to 24 |
| <b>DISCUSSION</b> |                                                       |                                                                                                                                                                                                                                                                                                                                                                                         |   |               |
| 15                | Summary of findings                                   | Summarize the main findings, taking into account the review's objective(s), research question(s), focus and intended audience(s).                                                                                                                                                                                                                                                       | Y | 25            |
| 16                | Strengths, limitations and future research directions | Discuss both the strengths of the review and its limitations. These should include (but need not be restricted to) (a) consideration of all the steps in the review process and (b) comment on the overall strength of evidence supporting the explanatory insights which emerged. The limitations identified may point to areas where further work is needed.                          | Y | 26-28         |
| 17                | Comparison with existing literature                   | Where applicable, compare and contrast the review's findings with the existing literature (for example, other reviews) on the same topic.                                                                                                                                                                                                                                               | Y | 25 to 26      |
| 18                | Conclusion and recommendations                        | List the main implications of the findings and place these in the context of other relevant literature. If appropriate, offer recommendations for policy and practice.                                                                                                                                                                                                                  | Y | 27            |
| 19                | Funding                                               | Provide details of funding source (if any) for the review, the role played by the funder (if any) and any conflicts of interests of the reviewers.                                                                                                                                                                                                                                      | Y | 29            |

## Supplementary file 2: Realist Review Protocol

**Title:** Circumstances that promote social connectedness in older adults participating in intergenerational programs with adolescents: a realist review

### Introduction

Intergenerational programs are programs that involve two unrelated generational groups and result in a mutually beneficial outcome for the participants. Erikson's theory of psychosocial development highlights that adolescents (for the purpose of this review aged 13-19) and older adults (for the purpose of this review 65 and older) are at comparable stages, facing questions around identity and integrity and dealing with life transitions of puberty and retirements respectively.

Social connectedness is highlighted as a major factor in wellbeing and health, particularly for older adults. The perceived or real lack of opportunities to be connected socially and with society can have negative impacts on a person's physical, social and mental health.

For the purpose of this review, the impact of intergenerational programs, that involve both adolescents and older adults, on social connectedness outcomes in the older adult group will be explored. The contexts and mechanism by which the program was delivered will also be explored as key parts of the interventions with the result of the review aiming to determine what contexts and mechanisms lead to the most beneficial outcomes for social connectedness. The objective of this realist review is to develop a program theory that guides the development of intergenerational programs involving adolescents and older adults, that impact upon social connectedness in older adults. There is a current gap in the literature addressing programs that involve specifically adolescents and their impact on the domain of social connectedness.

### Review Question

The SPIDER framework was used to develop the review question, which is based on describing the Sample (S), Phenomenon of Interest (PI), Design (D), Evaluation (E), and Research type (R) (Cook et al. 2012).

*Sample:* Adults aged 65 and over and adolescents aged 13-19 that are unrelated and engaged in engaged in intergenerational programs

1  
2  
3  
4  
5  
6  
7  
8  
9  
10  
11  
12  
13  
14  
15  
16  
17  
18  
19  
20  
21  
22  
23  
24  
25  
26  
27  
28  
29  
30  
31  
32  
33  
34  
35  
36  
37  
38  
39  
40  
41  
42  
43  
44  
45  
46  
47  
48  
49  
50  
51  
52  
53  
54  
55  
56  
57  
58  
59  
60

*Phenomenon of interest:* Any type of Intergenerational programs that involve two non-familial generational groups - adults aged 65 and over and adolescents aged 13-19. Inclusive of intergenerational programs that take place in community settings, including educational and aged care settings.

*Design:* Realist review

*Evaluation:* We will focus on characteristics, views and experiences from qualitative literature. From quantitative literature we will focus on the assessment of outcomes such as social connectedness, social isolation, social loneliness, social support, social participation and social interaction.

*Research type:* Quantitative studies, qualitative studies, mixed methods.

Final review question: *Which circumstances promote social connectedness in older adults participating in intergenerational programs with adolescent?*

**Plan for generation of *a priori* theories:**

*A priori* theories will be developed utilising an iterative, two-part process. This will include an initial scoping search of Medline using the search terms outlined in the *Search Strategy* section below. We will also undertake initial engagement with relevant stakeholder to develop the *a priori* theories. The idea for this review came from a collaboration involving the authors, a municipality in regional Victoria, Australia, and a high school located within that municipality. Originally, the collaboration was centred on the development and evaluation of a pilot intergenerational digital literacy program involving adolescent school pupils and older community-dwelling individuals. However, during the initial stages of designing the program, the authors identified there was an absence of review-level evidence regarding intergenerational programs involving adolescents and older people. A decision was made to undertake a realist review on this topic. Municipal and high school collaborator stakeholders, namely senior teachers, municipal project officers and positive ageing ambassadors, will be involved in the process of generating *a priori* theories by contributing information on the need and opportunity for intergenerational programs in the school environment.

## Search Strategy

The following electronic databases will be searched using English language limitation: MEDLINE, PsychINFO, CINAHL. Google Scholar will be used to supplement the search using a simplified search terms list from below.

Search terms included; (Aged OR "older adult" OR senior OR elder\* OR geriatric OR "old\* person\*") AND ("intergenerational relation\*" OR "intergenerational program\*" OR "intergenerational activit\*" OR "intergenerational practice" OR "intergenerational learning" OR "intergenerational service learning" OR "intergenerational relations" OR intergenerational) AND ("social connect\*" OR "social isolation" OR "social interact\*" OR loneliness OR "social participation") AND ("adolescent")

## Inclusion and Exclusion Criteria

Qualitative, Quantitative and Mixed method studies will be eligible for inclusion

| Included                                     | Excluded                                                                                               |
|----------------------------------------------|--------------------------------------------------------------------------------------------------------|
| Study reported on intergenerational programs | Reported on non-intergenerational programs                                                             |
| Participants from non-familial generations   | Studies involving the study of grandparents / grandparenting or family intergenerational relationships |
| Aged 13-19                                   | Aged <13                                                                                               |
| Aged 65 and above                            | Aged 20-64                                                                                             |
| Published 2000-2020                          | Published before 2000                                                                                  |
| Published in English                         | Not published in English                                                                               |

Where studies include part of the age range and are determined to contribute to the development of the program theory, they will be included. Two reviewers will determine such studies inclusion.

## Study Selection

Two reviewers will determine included studies. Inclusion criteria as above will be applied to the studies retrieved from the search.

## Data extraction and Quality Assessment

Data will be extracted using a bespoke data extraction form. A bespoke quality assessment tool will be developed. Both data extraction and quality assessment will be undertaken by two reviewers.



**Data synthesis**

The aim of the synthesis is to identify potential context-mechanism-outcome configurations (CMOCs) to develop a programme theory about the circumstances that can promote social connectedness in older adults participating in intergenerational programs with adolescent.

For peer review only

1  
2  
3  
4  
5  
6  
7  
8  
9  
10  
11  
12  
13  
14  
15  
16  
17  
18  
19  
20  
21  
22  
23  
24  
25  
26  
27  
28  
29  
30  
31  
32  
33  
34  
35  
36  
37  
38  
39  
40  
41  
42  
43  
44  
45  
46  
47  
48  
49  
50  
51  
52  
53  
54  
55  
56  
57  
58  
59  
60

**REFERENCES**

Cooke A, Smith D and Booth A (2012) Beyond PICO: The SPIDER Tool for Qualitative Evidence Synthesis. *Qualitative Health Research* 22(10) 1435-1443

For peer review only

| Number                             | combined          | Search term - Medline                   | MeSH | Keyword | total      |     |
|------------------------------------|-------------------|-----------------------------------------|------|---------|------------|-----|
| 3 or 7                             | 2963804           | (MH "Aged") OR (MH "Aged, 80 and Over") | yes  |         | 3076650    |     |
|                                    | <b>OR</b>         |                                         |      |         |            |     |
|                                    | 355786            | "older adult" OR                        |      |         |            | yes |
|                                    |                   | senior OR                               |      |         |            | yes |
|                                    |                   | elder* OR                               |      |         |            | yes |
|                                    |                   | geriatric OR                            |      |         |            | yes |
| "old* person*" OR                  |                   |                                         |      | yes     |            |     |
| 1 or 2 or 4                        | <b>AND</b>        |                                         |      |         |            |     |
|                                    | 6242              | "intergenerational relation*" OR        |      |         | yes        |     |
|                                    |                   | "intergenerational program*" OR         |      |         | yes        |     |
|                                    |                   | "intergenerational activit*" OR         |      |         | yes        |     |
|                                    |                   | "intergenerational practice" OR         |      |         | yes        |     |
|                                    |                   | "intergenerational learning"            |      |         | yes        |     |
|                                    | <b>OR</b>         |                                         |      |         |            |     |
|                                    | 3734              | intergenerational relations             | yes  |         |            |     |
|                                    | <b>OR</b>         |                                         |      |         |            |     |
| 6242                               | intergenerational |                                         |      | yes     |            |     |
| 5                                  | <b>AND</b>        |                                         |      |         |            |     |
|                                    | 44986             | "social connect*" OR                    |      |         | yes        |     |
|                                    |                   | "social isolation" OR                   |      |         | yes        |     |
|                                    |                   | "social interact*" OR                   |      |         | yes        |     |
|                                    |                   | loneliness OR                           |      |         | yes        |     |
|                                    |                   | "social participation"                  |      |         | yes        |     |
| <b>5 and 6 and 8</b>               | <b>TOTAL</b>      |                                         |      |         | <b>105</b> |     |
| <b>Limited to english language</b> |                   |                                         |      |         | <b>93</b>  |     |

| Number                | combined                                   | Search term -CINAHL                     | MeSH | Keyword | total      |  |
|-----------------------|--------------------------------------------|-----------------------------------------|------|---------|------------|--|
| S1 OR S5              | 720418                                     | (MH "Aged") OR (MH "Aged, 80 and Over") | yes  |         | 772260     |  |
|                       | <b>OR</b>                                  |                                         |      |         |            |  |
|                       | 162145                                     | "older adult" OR                        |      | yes     |            |  |
|                       |                                            | senior OR                               |      | yes     |            |  |
|                       |                                            | elder* OR                               |      | yes     |            |  |
|                       |                                            | geriatric OR                            |      | yes     |            |  |
| "old* person*" OR     |                                            |                                         | yes  |         |            |  |
| <b>AND</b>            |                                            |                                         |      |         |            |  |
| S2 OR S3              | 6242                                       | "intergenerational relation*" OR        |      | yes     | 6242       |  |
|                       |                                            | "intergenerational program*" OR         |      | yes     |            |  |
|                       |                                            | "intergenerational activit*" OR         |      | yes     |            |  |
|                       |                                            | "intergenerational practice" OR         |      | yes     |            |  |
|                       |                                            | "intergenerational learning"            |      | yes     |            |  |
|                       | <b>OR</b>                                  |                                         |      |         |            |  |
| 6242                  | intergenerational                          |                                         | yes  |         |            |  |
| <b>AND</b>            |                                            |                                         |      |         |            |  |
| S6                    | 22543                                      | "social connect*" OR                    |      | yes     | 22543      |  |
|                       |                                            | "social isolation" OR                   |      | yes     |            |  |
|                       |                                            | "social interact*" OR                   |      | yes     |            |  |
|                       |                                            | loneliness OR                           |      | yes     |            |  |
|                       |                                            | "social participation"                  |      | yes     |            |  |
| <b>TOTAL</b>          |                                            |                                         |      |         | <b>143</b> |  |
| S6 AND S12<br>AND S14 | <b>Limited to age and english language</b> |                                         |      |         | <b>139</b> |  |

| Number               | combined                           | Search term -PsycINFO                   | MeSH | Keyword | total      |  |
|----------------------|------------------------------------|-----------------------------------------|------|---------|------------|--|
| 1 or 6               |                                    | (MH "Aged") OR (MH "Aged, 80 and Over") |      | yes     |            |  |
|                      | <b>OR</b>                          |                                         |      |         |            |  |
|                      |                                    | "older adult" OR                        |      | yes     |            |  |
|                      |                                    | senior OR                               |      | yes     |            |  |
|                      |                                    | elder* OR                               |      | yes     |            |  |
|                      |                                    | geriatric OR                            |      | yes     |            |  |
|                      |                                    | "old* person*"                          |      | yes     |            |  |
| 2 or 3 or 4          | <b>AND</b>                         |                                         |      |         |            |  |
|                      |                                    | "intergenerational relation*" OR        |      | yes     |            |  |
|                      |                                    | "intergenerational program*" OR         |      | yes     |            |  |
|                      |                                    | "intergenerational activit*" OR         |      | yes     |            |  |
|                      |                                    | "intergenerational practice" OR         |      | yes     |            |  |
|                      |                                    | "intergenerational learning"            |      | yes     |            |  |
|                      | <b>OR</b>                          |                                         |      |         |            |  |
|                      |                                    | intergenerational relations             | yes  |         |            |  |
|                      | <b>OR</b>                          |                                         |      |         |            |  |
|                      | intergenerational                  |                                         | yes  |         |            |  |
| 5                    | <b>AND</b>                         |                                         |      |         |            |  |
|                      |                                    | "social connect*" OR                    |      | yes     |            |  |
|                      |                                    | "social isolation" OR                   |      | yes     |            |  |
|                      |                                    | "social interact*" OR                   |      | yes     |            |  |
|                      |                                    | loneliness OR                           |      | yes     |            |  |
|                      | "social participation"             |                                         | yes  |         |            |  |
| <b>5 and 6 and 7</b> | <b>TOTAL</b>                       |                                         |      |         | <b>144</b> |  |
|                      | <b>Limited to english language</b> |                                         |      |         | <b>133</b> |  |

1  
2  
3  
4  
5  
6  
7  
8  
9  
10  
11  
12  
13  
14  
15  
16  
17  
18  
19  
20  
21  
22  
23  
24  
25  
26  
27  
28  
29  
30  
31  
32  
33  
34  
35  
36  
37  
38  
39  
40  
41  
42  
43  
44  
45  
46

|                                                                                                                 |           |
|-----------------------------------------------------------------------------------------------------------------|-----------|
| <b>Google Scholar</b>                                                                                           |           |
| older people or aged or senior AND "intergenerational program*" or intergenerational AND "social connectedness" | <b>73</b> |

|                   |                                                                                                                                                                    |
|-------------------|--------------------------------------------------------------------------------------------------------------------------------------------------------------------|
| <b>Search two</b> | Added "adolescent" <a href="#">search term</a> to each <a href="#">of the above search strategies</a> in order to refine search by age limit of agreed 13-19 years |
|-------------------|--------------------------------------------------------------------------------------------------------------------------------------------------------------------|

For peer review only

**Supplementary File 4: Inclusion and Exclusion Criteria**

| Included                                                                                               | Excluded                                                                                               |
|--------------------------------------------------------------------------------------------------------|--------------------------------------------------------------------------------------------------------|
| Study reporting on intergenerational programs. Study can be quantitative, qualitative or mixed-methods | Reported on non-intergenerational programs                                                             |
| Participants from non-familial generations                                                             | Studies involving the study of grandparents / grandparenting or family intergenerational relationships |
| Aged 13-19                                                                                             | Aged <13                                                                                               |
| Aged 65 and above                                                                                      | Aged 20-64                                                                                             |
| Published 2000-2020                                                                                    | Published before 2000                                                                                  |
| Published in English                                                                                   | Not published in English                                                                               |

1  
2  
3  
4  
5 **SUPPLEMENTARY FILE 5: DATA EXTRACTION FORM**  
6  
7

| <b>1. Bibliographic details</b>                                                           |  |
|-------------------------------------------------------------------------------------------|--|
| Article number:                                                                           |  |
| Article reference:                                                                        |  |
| Extracted by:                                                                             |  |
| Checked by:                                                                               |  |
| Researcher details (discipline or professional background)                                |  |
| What are the geographic details of the study?                                             |  |
| <b>2. Aims and Methods</b>                                                                |  |
| What is the study type?                                                                   |  |
| What methods were used?                                                                   |  |
| Are the aims/ objectives clearly stated in the study? Detail                              |  |
| Is the research question/s stated explicitly or within the text? Detail                   |  |
| What materials were used to collect the data?                                             |  |
| How was the data analysed?                                                                |  |
| Does the intervention use a particular theory to inform its design?                       |  |
| <b>3. Participants</b>                                                                    |  |
| What was the sample size?                                                                 |  |
| What were the sample characteristics?                                                     |  |
| How were participants recruited?                                                          |  |
| What were the inclusion and exclusion criteria?                                           |  |
| <b>4. Intervention details</b>                                                            |  |
| What was the intervention?                                                                |  |
| How was the intervention delivered?                                                       |  |
| Who is delivering the intervention?                                                       |  |
| In what setting was the intervention delivered?<br>Why was this setting / context chosen? |  |
| Was this setting appropriate to examine the research question?                            |  |
| Was the intervention designed with the participants (one or both age groups)?             |  |
| How were adolescents involved in the intervention?                                        |  |



|    |                                                                                                                                                                                                                                  |  |
|----|----------------------------------------------------------------------------------------------------------------------------------------------------------------------------------------------------------------------------------|--|
| 1  | How were older people involved in the intervention?                                                                                                                                                                              |  |
| 2  |                                                                                                                                                                                                                                  |  |
| 3  |                                                                                                                                                                                                                                  |  |
| 4  |                                                                                                                                                                                                                                  |  |
| 5  | <b>5. Findings/ Results</b>                                                                                                                                                                                                      |  |
| 6  | What was the reported experiences of the participants?                                                                                                                                                                           |  |
| 7  |                                                                                                                                                                                                                                  |  |
| 8  | What was the reported experience of the facilitators?                                                                                                                                                                            |  |
| 9  |                                                                                                                                                                                                                                  |  |
| 10 | Did the intervention focus on/ impact on social connectedness?                                                                                                                                                                   |  |
| 11 |                                                                                                                                                                                                                                  |  |
| 12 | Did the adolescents report (or was it reported by others) greater understanding of older people?                                                                                                                                 |  |
| 13 |                                                                                                                                                                                                                                  |  |
| 14 |                                                                                                                                                                                                                                  |  |
| 15 | Did the older people report (or was it reported by others) impact upon social connectedness?                                                                                                                                     |  |
| 16 |                                                                                                                                                                                                                                  |  |
| 17 |                                                                                                                                                                                                                                  |  |
| 18 | Did the older people report (or was it reported by others) impact upon overall health and wellbeing?                                                                                                                             |  |
| 19 |                                                                                                                                                                                                                                  |  |
| 20 |                                                                                                                                                                                                                                  |  |
| 21 | Did the older people report (or was it reported by others) greater understanding of the younger generation?                                                                                                                      |  |
| 22 |                                                                                                                                                                                                                                  |  |
| 23 |                                                                                                                                                                                                                                  |  |
| 24 | Did the age range of the participants impact upon the success of the intervention? Were there structural barriers here e.g. transport, health issues?                                                                            |  |
| 25 |                                                                                                                                                                                                                                  |  |
| 26 |                                                                                                                                                                                                                                  |  |
| 27 |                                                                                                                                                                                                                                  |  |
| 28 |                                                                                                                                                                                                                                  |  |
| 29 | What themes (qualitative) / headline findings (quantitative) were generated by the study? (around intergenerational programs, adolescents, older people, context in which delivered/ undertaken)                                 |  |
| 30 |                                                                                                                                                                                                                                  |  |
| 31 |                                                                                                                                                                                                                                  |  |
| 32 |                                                                                                                                                                                                                                  |  |
| 33 | Are the findings interpreted within the contexts of other studies and theory?                                                                                                                                                    |  |
| 34 |                                                                                                                                                                                                                                  |  |
| 35 | <b>6. Were the <i>a priori</i> theories supported/ confirmed?</b>                                                                                                                                                                |  |
| 36 | That intergenerational programs involving adolescents and older adults improve social connectedness in the older adult group                                                                                                     |  |
| 37 |                                                                                                                                                                                                                                  |  |
| 38 | That intergenerational programs conducted in educational contexts result in positive outcomes in social connectedness for one/both groups                                                                                        |  |
| 39 |                                                                                                                                                                                                                                  |  |
| 40 | Adolescents and older people are at a similar psychological milestone and therefore are mutual beneficiaries of intergenerational programs                                                                                       |  |
| 41 |                                                                                                                                                                                                                                  |  |
| 42 | Older people may be socially disconnected in the absence of loneliness- intergenerational programs help support meaningful connections within the community, with individuals outside of their normal age and social demographic |  |
| 43 |                                                                                                                                                                                                                                  |  |
| 44 | Greater generativity is formed through participation in intergenerational programs                                                                                                                                               |  |
| 45 |                                                                                                                                                                                                                                  |  |
| 46 | Intergenerational programs conducted in educational contexts build community connections between generations and across structural community assets like schools.                                                                |  |
| 47 |                                                                                                                                                                                                                                  |  |
| 48 | What new theories were generated by this study?                                                                                                                                                                                  |  |
| 49 |                                                                                                                                                                                                                                  |  |
| 50 |                                                                                                                                                                                                                                  |  |
| 51 |                                                                                                                                                                                                                                  |  |
| 52 |                                                                                                                                                                                                                                  |  |
| 53 |                                                                                                                                                                                                                                  |  |
| 54 |                                                                                                                                                                                                                                  |  |
| 55 |                                                                                                                                                                                                                                  |  |
| 56 |                                                                                                                                                                                                                                  |  |
| 57 |                                                                                                                                                                                                                                  |  |
| 58 |                                                                                                                                                                                                                                  |  |
| 59 |                                                                                                                                                                                                                                  |  |
| 60 |                                                                                                                                                                                                                                  |  |

**SUPPLEMENTARY FILE 6: QUALITY ASSESSMENT**

| <b>Quality Assessment Criteria</b> |                                                                                                                                                                                          |
|------------------------------------|------------------------------------------------------------------------------------------------------------------------------------------------------------------------------------------|
| <b>1</b>                           | Is there adequate rationale for using this design to address the research aim/ question?                                                                                                 |
| <b>2</b>                           | Did the authors justify the sample size used?                                                                                                                                            |
| <b>3</b>                           | Is adequate evidence provided to support the findings?                                                                                                                                   |
| <b>4</b>                           | Quantitative Studies: When comparing / analysing the groups (if more than one), did the authors consider the<br>- Comparability<br>- Confounding variables<br>and controlling for these? |
| <b>5</b>                           | Qualitative Studies: Did the researchers consider their own position, assumptions and possible biases?                                                                                   |
| <b>6</b>                           | Were the strengths and limitations stated?                                                                                                                                               |
| <b>7</b>                           | Was ethical committee approval obtained?                                                                                                                                                 |
| <b>8</b>                           | How valuable is this research to the review? High, Medium or Low                                                                                                                         |

\*Items 1,2,3,5,7,8 from CASP qualitative checklist (CASP 2018a). Items 5, 1 and 7 also from Long (2005). Item 4 from CASP Cohort Study Checklist (CASP 2018b)

**REFERENCES**

Long A (2005). Evaluative tool for mixed method studies. University of Leeds, School of Healthcare[online]. 24:2017.

Critical Appraisal Skills Programme (2018). CASP (Qualitative) Checklist. [online] Available at: [https://casp-uk.net/images/checklist/documents/CASP-Qualitative-Studies-Checklist/CASP-Qualitative-Checklist-2018\\_fillable\\_form.pdf](https://casp-uk.net/images/checklist/documents/CASP-Qualitative-Studies-Checklist/CASP-Qualitative-Checklist-2018_fillable_form.pdf). Date Accessed: 17/2/20

Critical Appraisal Skills Programme (2018). CASP (Cohort Study) Checklist. [online] Available at: [https://casp-uk.net/images/checklist/documents/CASP-Cohort-Study-Checklist/CASP-Cohort-Study-Checklist-2018\\_fillable\\_form.pdf](https://casp-uk.net/images/checklist/documents/CASP-Cohort-Study-Checklist/CASP-Cohort-Study-Checklist-2018_fillable_form.pdf). Accessed: Date Accessed: 17/2/20

| Quality Assessment Criteria |                                                                                                                                                                                       | de Souza[45] | Kessler and Staudinger[37] | Hernandez and Gonzalez[46] | Wilson, Cordier[47] | Biggs and Knox[48] | Knight, Skouteris[35] | Ostensen, Gjevjon[15] | Santini, Tombolesi[49] | Wilson, Cordier[33] |
|-----------------------------|---------------------------------------------------------------------------------------------------------------------------------------------------------------------------------------|--------------|----------------------------|----------------------------|---------------------|--------------------|-----------------------|-----------------------|------------------------|---------------------|
| 1                           | Is there adequate rationale for using this design to address the research aim/question?                                                                                               | ✓            | ✓                          | ✓                          | ✓                   | ✓                  | ✓                     | ✓                     | ✓                      | ✓                   |
| 2                           | Did the authors justify the sample size used?                                                                                                                                         | UNCLEAR      | ✓                          | ✓                          | ✓                   | ✓                  | ✓                     | ✓                     | ✓                      | ✓                   |
| 3                           | Is adequate evidence provided to support the findings?                                                                                                                                | ✓            | ✓                          | ✓                          | ✓                   | UNCLEAR            | ✓                     | ✓                     | ✓                      | ✓                   |
| 4                           | Quantitative Studies: When comparing / analysing the groups (if more than one), did the authors consider the<br>- Comparability<br>- Confounding variables and controlling for these? | N/A          | ✓                          | ✓                          | N/A                 | ✓                  | N/A                   | N/A                   | N/A                    | ✓                   |
| 5                           | Qualitative Studies: Did the researchers consider their own position, assumptions and possible biases?                                                                                | UNCLEAR      | N/A                        | N/A                        | ✓                   | N/A                | ✓                     | UNCLEAR               | ✓                      | UNCLEAR             |
| 6                           | Were the strengths and limitations stated?                                                                                                                                            | ✓            | ✓                          | ✓                          | ✓                   | ✓                  | ✓                     | ✓                     | ✓                      | ✓                   |
| 7                           | Was ethical committee approval obtained?                                                                                                                                              | UNCLEAR      | UNCLEAR                    | ✓                          | ✓                   | ✓                  | ✓                     | ✓                     | UNCLEAR                | ✓                   |
| 8                           | How valuable is this research to the review? High, Medium or Low                                                                                                                      | HIGH         | HIGH                       | MEDIUM                     | HIGH                | MEDIUM             | HIGH                  | HIGH                  | HIGH                   | HIGH                |

# BMJ Open

## Circumstances that promote social connectedness in older adults participating in intergenerational programs with adolescents: a realist review

|                                 |                                                                                                                                                                                                                                                            |
|---------------------------------|------------------------------------------------------------------------------------------------------------------------------------------------------------------------------------------------------------------------------------------------------------|
| Journal:                        | <i>BMJ Open</i>                                                                                                                                                                                                                                            |
| Manuscript ID                   | bmjopen-2022-069765.R3                                                                                                                                                                                                                                     |
| Article Type:                   | Original research                                                                                                                                                                                                                                          |
| Date Submitted by the Author:   | 04-Sep-2023                                                                                                                                                                                                                                                |
| Complete List of Authors:       | Simionato, J; La Trobe University, Department of Public Health<br>Vally, H; Deakin University, Institute for Health Transformation<br>Archibald, Daryll; University of Dundee, School of Health Sciences; La Trobe University, Department of Public Health |
| <b>Primary Subject Heading</b>: | Public health                                                                                                                                                                                                                                              |
| Secondary Subject Heading:      | Sociology                                                                                                                                                                                                                                                  |
| Keywords:                       | PUBLIC HEALTH, SOCIAL MEDICINE, PREVENTIVE MEDICINE                                                                                                                                                                                                        |
|                                 |                                                                                                                                                                                                                                                            |

SCHOLARONE™  
Manuscripts



I, the Submitting Author has the right to grant and does grant on behalf of all authors of the Work (as defined in the below author licence), an exclusive licence and/or a non-exclusive licence for contributions from authors who are: i) UK Crown employees; ii) where BMJ has agreed a CC-BY licence shall apply, and/or iii) in accordance with the terms applicable for US Federal Government officers or employees acting as part of their official duties; on a worldwide, perpetual, irrevocable, royalty-free basis to BMJ Publishing Group Ltd ("BMJ") its licensees and where the relevant Journal is co-owned by BMJ to the co-owners of the Journal, to publish the Work in this journal and any other BMJ products and to exploit all rights, as set out in our [licence](#).

The Submitting Author accepts and understands that any supply made under these terms is made by BMJ to the Submitting Author unless you are acting as an employee on behalf of your employer or a postgraduate student of an affiliated institution which is paying any applicable article publishing charge ("APC") for Open Access articles. Where the Submitting Author wishes to make the Work available on an Open Access basis (and intends to pay the relevant APC), the terms of reuse of such Open Access shall be governed by a Creative Commons licence – details of these licences and which [Creative Commons](#) licence will apply to this Work are set out in our licence referred to above.

Other than as permitted in any relevant BMJ Author's Self Archiving Policies, I confirm this Work has not been accepted for publication elsewhere, is not being considered for publication elsewhere and does not duplicate material already published. I confirm all authors consent to publication of this Work and authorise the granting of this licence.

1  
2  
3  
4  
5  
6  
7  
8  
9  
10  
11  
12  
13  
14  
15  
16  
17  
18  
19  
20  
21  
22  
23  
24  
25  
26  
27  
28  
29  
30  
31  
32  
33  
34  
35  
36  
37  
38  
39  
40  
41  
42  
43  
44  
45  
46  
47  
48  
49  
50  
51  
52  
53  
54  
55  
56  
57  
58  
59  
60

## Circumstances that promote social connectedness in older adults participating in intergenerational programs with adolescents: a realist review

Authors: Simionato J<sup>1</sup>, Vally H<sup>2</sup> and Archibald D<sup>1,3</sup>

<sup>1</sup> Department of Public Health, La Trobe University, Plenty Road and Kingsbury Drive, VIC 3086 Australia

<sup>2</sup> School of Health and Social Development, Deakin University, 221 Burwood Highway, Burwood, VIC 3125, Australia

<sup>3</sup> School of Health Sciences, University of Dundee, 11 Airlie Place, Dundee DD1 4HJ, Dundee, United Kingdom

Key words: Intergenerational Program, Older adults, Adolescents, Social Connectedness, Realist Review

Corresponding author:

Dr Daryll Archibald, School of Health Sciences, University of Dundee, 11 Airlie Place, Dundee DD1 4HJ. Email: [DArchibald001@dundee.ac.uk](mailto:DArchibald001@dundee.ac.uk)

**Word Count: 6391**

**ABSTRACT**

**Objectives:** Limited social connectedness in older adults is a risk factor for poor physical and mental health. Older adults who are socially isolated, lonely and disconnected have a higher risk of chronic illness, depression and premature death. Current literature suggests that improved social connectedness reduces these risks. Intergenerational programs are an effective way to improve health outcomes. Despite this, there is yet to be a review using realist review methods that seeks to identify the circumstances that promote social connectedness in older adults participating in intergenerational programs with adolescents.

**Design:** A realist review methodology was chosen to account for the complexity of intergenerational interventions. Nine studies were included. In line with realist review methodology, iterative data extraction and analysis was conducted to identify the specific contexts, mechanisms, and outcomes of the programs. Specific circumstances were identified to develop theories relating to improved social connectedness in older adults.

**Data sources:** MEDLINE, PsychINFO, CINAHL were searched using English language limitation.

**Eligibility criteria:** Included participants were aged 65 and over (older adults) and between 13 and 19 years (adolescents) participating in intergenerational programs from non-familial generations. Studies had to be published in English between 2000 and 2020 and could be quantitative, qualitative or mixed-methods primary research studies.

**Data extraction and synthesis:** Two independent reviewers used a bespoke data extraction form. All authors were involved in the synthesis process which used the extracted data to illuminate the contexts, mechanisms and outcomes that underpinned reviewed programs.

**Results:** The nine included studies were set in different contexts, including community organisations, schools and aged care facilities and used an array of interventions including reminiscence therapy, craft, or space for conversation. Despite study heterogeneity, the parallels in psychosocial development between older adults and adolescents were shown to be a likely driver for improved social health outcomes. Programs most likely to improve social health outcomes were those that acknowledged psychosocial development, were delivered in community settings, leveraged pedagogic frameworks, used trained facilitators, and supported participants to build relationships through shared purpose.

**Conclusions:** This review contributes a logic model to support the design and development of intergenerational programs involving adolescents to improve social connectedness in older adults. Future research to test the logic model in practice is needed.

### Strengths and limitations of this study

- This is the first realist review to investigate the circumstances that promote social connectedness in older adults participating in intergenerational programs with adolescents
- Comprehensive searches were undertaken with the aim of identifying all relevant published and grey literature.
- A logic model has been developed to support the design and development of intergenerational programs involving adolescents to improve social connectedness in older adults.
- The evidence base is limited for participants living in rural locations and participants with cognitive impairment.



## INTRODUCTION

Limited social connectedness is a risk for poor health and wellbeing in older adults[1-4]. Older adults (over 65 years) are at particular risk of social disconnectedness and loneliness because of frailty and chronic illness, which may limit opportunities for social interaction[5, 6]. In addition, modern society has altered family structures, geographically dispersed the family unit and made maintaining intergenerational and family connections challenging, adding to social health vulnerability in older people[7-10]. Many older adults move into residential aged care facilities, away from familiar community supports which may impact social connectedness.

Social disconnectedness, loneliness and social isolation can be as damaging to health and wellbeing as smoking and obesity[4, 7, 11, 12]. Poor health due to acute or chronic conditions, cognitive decline or frailty influences an older person's ability to carry out personal, domestic, social or community activities and in turn increases their risk of social disconnectedness[1, 13, 14]. Older adults who remain socially connected without episodes of isolation or loneliness have lower rates of mental and chronic illnesses such as depression and cardiovascular disease[7, 11, 15-17].

Support for older adults, particularly post retirement or when faced with cognitive or physical impairment, is essential in maintaining individual social identity and social connectedness with family, friends and the community[4, 11]. The World Health Organization has challenged communities to provide age friendly communities. This global movement is demonstrating the power of building social capital and engaging older adults through community programs and social and environmental infrastructure to support community access[18]. Intergenerational programs have emerged as a popular and beneficial option for bolstering community connections and improving the health and wellbeing of older people[11, 19, 20].

Intergenerational programs are programs where two generations experience mutual benefit through shared experiences[19, 21] and are a known mechanism for improving social connectedness[19] and providing a sense of inclusion and empowerment in older adults[22]. Intergenerational programs bring together and benefit both generational groups[22-26] and have been adopted in a variety of contexts and age groups. These include the use of pedagogic frameworks with school age children[22], service-learning interventions with university students[27, 28] and in familial groups[25].

Several previous reviews have been undertaken on intergenerational programming. For example, systematic reviews by Gualano et al.[19] and Zhong et al.[29] focused on quantitative studies of older adults aged 50 and over and younger people 30 and below undertaken in educational settings. Gualano et al.[19] found that intergenerational programs benefit older people in terms

1 of keeping active and fighting social isolation, whilst Zhong et al. [29] found that intergenerational  
2 programs with young children may bring the greatest health benefits to older people across  
3 physical, mental and social domains. Further systematic reviews by Giraudeau and Bailly[30] and  
4  
5  
6  
7  
8  
9  
10  
11  
12  
13  
14  
15  
16  
17  
18  
19  
20  
21  
22  
23  
24  
25  
26  
27  
28  
29  
30  
31  
32  
33  
34  
35  
36  
37  
38  
39  
40  
41  
42  
43  
44  
45  
46  
47  
48  
49  
50  
51  
52  
53  
54  
55  
56  
57  
58  
59  
60

of keeping active and fighting social isolation, whilst Zhong et al. [29] found that intergenerational programs with young children may bring the greatest health benefits to older people across physical, mental and social domains. Further systematic reviews by Giraudeau and Bailly[30] and Martins et al.[31] included primary research studies of any type focusing on adults over 60[30] and 65[31] undertaken in a variety of community, assisted living, education, and nursing home settings. Giraudeau and Bailly[30] found that intergenerational programs bring mental health benefits for older people, whilst Martins et al.[31] reported that intergenerational programs can lead to reaffirmation of value, greater life satisfaction and improved self-esteem for older adults[31].

In terms of impacts on children, both Martins et al.[31] and Giraudeau and Bailly[30] focused on pre-school and primary school children and found that intergenerational programs improved children's perceptions of older people. In addition, Martins et al.[31] further found that for children, intergenerational programs led to higher self-esteem, better academic performance, improved social skills and a greater motivation to learn. Gualano et al.[19] also found that intergenerational programs improved younger people's perceptions of older people. Of these systematic reviews only Giraudeau and Bailly[30] outlined circumstances that may lead to a successful intergenerational program model, stating that to be successful, intergenerational programs should provide all the participants with a sense of being useful and competent and take time to prepare younger and older people by encouraging communication between the groups before the program begins.

A further relevant review undertaken in this area is a recently published realist review by Phang et al.[32]. This work focused on digital intergenerational programs explicitly geared towards reducing loneliness or social isolation in older adults undertaken in residential or community settings. The review identified four circumstances by which digital intergenerational program may reduce loneliness and social isolation for older adults. For community-dwelling older adults, training in digital technology and support from nurses helped to reduce loneliness. Phang et al.[32] further found that a video call with a student or family reduced loneliness among older adults residing in long-term residential care facilities, whilst videoconferencing with a lay coach may also reduce loneliness in adults who are lonely.

The above shows that whilst there is substantial evidence supporting intergenerational programs as an effective strategy to achieve improved physical and social health and wellbeing in older adults, there is yet to be a review of programs that involve adolescents specifically. Intergenerational programs involving older adults and preschool or young children have been reported in the primary research literature [14, 21, 22, 28], however those that pair adolescents (individuals aged 13-19) and older adults are less known[33]. Pairing older adults and adolescents

1 through intergenerational programs is modelled on Erikson's theory of psychosocial  
2 development[34, 35]. According to Erikson's theory, adolescents and older adults are both facing  
3 a period in their psychosocial development focused on identity. Adolescents, emerging from  
4 childhood are looking to their peers to 'fit in' and to understand society through the eyes of others.  
5 Older adults, particularly the recently retired, are trying to maintain their identity, with a desire  
6 to contribute to society[36]. This motivation to pass on wisdom to the next generation is termed  
7 generativity[34, 35] and is important for the wellbeing of older adults as well as broader social  
8 health[4]. Intergenerational interactions through family or a formal program support the  
9 development of generativity[34, 35, 37]. The likely benefits of this generational pairing in an  
10 intergenerational program context are yet to be reviewed in depth.

11 This realist review aims to identify the circumstances in which social connectedness is optimised  
12 for older adults when taking part in intergenerational interventions with adolescents. The  
13 question underpinning the review is – which circumstances promote social connectedness in older  
14 adults participating in intergenerational programs with adolescents.  
15  
16  
17  
18  
19  
20  
21  
22  
23  
24  
25  
26  
27  
28  
29  
30  
31  
32  
33  
34  
35  
36  
37  
38  
39  
40  
41  
42  
43  
44  
45  
46  
47  
48  
49  
50  
51  
52  
53  
54  
55  
56  
57  
58  
59  
60

## METHODOLOGY

A realist review methodology was undertaken in line with the RAMESES publication standards[38]. The RAMESES checklist for this study is available in Supplementary file 1. Realist review provides a framework for understanding complex interventions and *why* they deliver the outcomes they do[39]. A protocol for the review was developed following the stages outlined by Pawson[40] and included (1) locating existing theories, (2) searching for evidence, (3) selecting articles, (4) extracting and organising data, and (5) synthesising the evidence and drawing conclusions. This is available in Supplementary file 2.

A realist review is an approach used for systematic evidence review that utilises secondary data to understand the reasons why a particular set of contexts, mechanisms and outcomes lead to a particular result. Contexts are the circumstances in which the program is delivered and how these interact with the program mechanisms. Mechanisms are the program resources, and the way participants interact with them. The result of context and mechanism interaction is what drives a particular outcome to occur. Realist review utilises generative understanding to iteratively build *a priori* theories that are then tested and refined. The *a priori* theories are initially drawn from available literature and through stakeholder consultation. Realist review uses the lenses of context, mechanism and outcome to appraise, synthesise and then test the recommendations that are constructed through the analysis process[38, 39].

### **Step one: a priori theory development**

The development of *a priori* theories was an iterative, two-part process[38, 39, 41] and was undertaken by JS and DA. This included stakeholder engagement and a scoping search of the peer-reviewed and grey literature on the subject, followed by *a priori* theory development that were tested against the literature and information from initial stakeholder meetings.

#### *Search strategy*

A literature search was undertaken between May and July 2019 by JS and DA. An updated search was completed in June 2020. The search strategy was developed with the support of a La Trobe University librarian. MEDLINE, PsychINFO, CINAHL were searched using English language limitation.

The search terms were (Aged OR "older adult" OR senior OR elder\* OR geriatric OR "old\* person\*") AND ("intergenerational relation\*" OR "intergenerational program\*" OR "intergenerational activit\*" OR "intergenerational practice" OR "intergenerational learning" OR "intergenerational service learning" OR "intergenerational relations" OR intergenerational) AND

1 ("social connect\*" OR "social isolation" OR "social interact\*" OR loneliness OR "social  
2 participation") AND ("adolescent"). MeSH terms used were "Aged" OR "Aged, 80 and over) and  
3 "Intergenerational relations".  
4  
5

6  
7 Google Scholar was used to supplement the search using a simplified search terms list. Grey  
8 literature used the same search terms and was accessed via websites, including relevant  
9 government and non-government websites including Australian Federal and State Government  
10 agencies, Not-for profits and the World Health Organization. Reference list searching was also  
11 used. The full search strategy is available in supplementary file 3.  
12  
13  
14

#### 15 16 *Patient and public involvement*

17 No patients or members of the public were involved in this research.  
18

#### 19 20 *Stakeholder engagement*

21 The idea for this review came from a collaboration involving the authors, a municipality in regional  
22 Victoria, Australia, and a high school located within that municipality. Originally, the collaboration  
23 was centred on the development and evaluation of a pilot intergenerational digital literacy  
24 program involving adolescent school pupils and older community-dwelling individuals. However,  
25 during the initial stages of designing the program, the authors identified there was an absence of  
26 review-level evidence regarding intergenerational programs involving adolescents and older  
27 people. A decision was made to undertake a realist review on this topic. Municipal and high school  
28 collaborator stakeholders, namely senior teachers, municipal project officers and positive ageing  
29 ambassadors, were involved in the process of generating *a priori* theories by contributing  
30 information on the need and opportunity for intergenerational programs in the school  
31  
32  
33  
34  
35  
36  
37  
38  
39

#### 40 41 *Study selection*

42 Both study selection and critical appraisal were undertaken independently by two reviewers, JS  
43 and DA. The inclusion and exclusion criteria were applied by JS and DA to ensure the included  
44 studies met the aim of the review. Included participants were aged 65 and over (older adults)  
45 and between 13 and 19 years (adolescents) as these age ranges are agreed as defining older  
46 adults and adolescents[34] in early theories from Erikson on psychological development. Other  
47 studies addressing intergenerational programs use Erikson theory, so this was chosen to align  
48 with the current literature [31]. To be included in the review studies had to report on  
49 intergenerational programs with participants from non-familial generations. Studies had to be  
50 published in English between 2000 and 2020 and could be quantitative, qualitative or mixed-  
51 methods primary research studies. The full inclusion and exclusion criteria can be viewed in  
52 supplementary file 4.  
53  
54  
55  
56  
57  
58  
59  
60

1  
2 *a priori* theory development  
3

4 JS and DA developed six *a priori* theories and tested these against the literature before conducting  
5 a final literature search to check for new evidence.  
6  
7

8 **Step two: data extraction and evidence synthesis**  
9

10 In step two, data extraction and evidence synthesis from the nine included studies was  
11 undertaken.  
12

13 *Data extraction*  
14

15 A data extraction form (supplementary file 5) was developed by DA and JS and included the *a*  
16 *priori* theories identified in step one. The data extraction form covered several domains including  
17 bibliographic information, aims and methods, participant details, intervention details, results and  
18 findings. The form also provided for *a priori* theory testing including extraction of evidence that  
19 proved, disproved or refined the theory. The data extraction process was completed by JS and  
20 DA.  
21  
22  
23  
24  
25  
26

27 *Quality appraisal*  
28

29 A realist review method supports the inclusion of qualitative, quantitative and mixed methods  
30 studies[38, 42]. To understand the quality of included articles, we consulted critical appraisal  
31 literature[43, 44]. A tool comprising eight quality assessment criteria were developed focusing on  
32 the methodological quality and reporting quality of the included studies (supplementary file 6).  
33 Quality appraisal was conducted by JS and DA with any conflicts managed via team discussion.  
34  
35  
36  
37  
38

39 *Synthesis*  
40

41 All authors were involved in the evidence synthesis process using extracted data to illuminate the  
42 contexts, mechanisms and outcomes that underpinned reviewed programs. The process then  
43 involved identifying evidence combinations and testing them against the *a priori* theories to  
44 develop context mechanism outcome configurations (CMOC). The development of the CMOC  
45 presented a variety of emergent issues that were continually tested against the *a priori* theories  
46 and the known evidence. This process identified new theories and the CMOC were further  
47 refined. Ethics approval was not required for this study.  
48  
49  
50  
51  
52  
53  
54  
55  
56  
57  
58  
59  
60

## RESULTS

Four hundred and thirty four records were identified through database searching with eighty full text articles screened for eligibility. Subsequently, nine studies were included in the review. Data from the included studies were synthesised to generate eight theories relating to characteristics of intergenerational programs likely to optimise social connectedness for older adults. The components of these theories are combined to form context mechanism outcome configurations (CMOC) and a logic model to support answering the question – which circumstances promote social connectedness in older adults participating in intergenerational programs with adolescents? Figure 1 below provides the results of the literature search. Nine studies were included in the review. Five were qualitative, two quantitative and two mixed were methods. The overall participant characteristics were a mix of male and female older adults and adolescents, living in the community and participating in weekly or monthly programs over a set period. The settings in which the programs took place varied, including schools, aged care facilities and community group spaces such as Men’s sheds.

**\*Insert here Figure 1: Flow Diagram**

**Table 1: Included study characteristics**

| Included Study                    | Study details                                                                                                                                                                        | Study aim                                                                                                                                    | Sample characteristics                                                                                                                                          | Summary of findings                                                                                                                        | Use of a facilitator | Pre-program training   | Data collection and analysis                                                                                                                                                          |
|-----------------------------------|--------------------------------------------------------------------------------------------------------------------------------------------------------------------------------------|----------------------------------------------------------------------------------------------------------------------------------------------|-----------------------------------------------------------------------------------------------------------------------------------------------------------------|--------------------------------------------------------------------------------------------------------------------------------------------|----------------------|------------------------|---------------------------------------------------------------------------------------------------------------------------------------------------------------------------------------|
| <b>de Souza[45]</b>               | Qualitative; School (Brazil); Older adult participants shared life experiences with students in a classroom environment.                                                             | Intergenerational program evaluation from participant viewpoint.                                                                             | 84 randomly selected students;<br>Age 13-19 years;<br>26 older people; Age 60 years +; Male and female groups.                                                  | The intergenerational activity based on reminiscence improved social interaction and community wellbeing for older adults.                 | Unclear              | No                     | Focus group interviews followed by thematic analysis                                                                                                                                  |
| <b>Kessler and Staudinger[37]</b> | Quantitative; Laboratory (Germany); Interaction between an Older Person and Younger Person, Two Older People or Two Younger people addressing a "life problem" or a "media problem". | To understand if intergenerational interactions have the potential to facilitate psychological functioning in both adolescent and old age.   | Older women aged 70-74 n=90 and girls aged 14-15 n=90                                                                                                           | Improved cognitive performance, reduced negative age-related stereotypes and triggered generative behaviours.                              | No                   | No                     | Data collected by a series of survey, psychometric and cognitive tests. Analysis completed using planned comparisons                                                                  |
| <b>Hernandez and Gonzalez[46]</b> | Quantitative; Local council social centre (Spain); Weekly recreational activities (talks, excursions, cultural events). 32 interactive session "movement program".                   | To investigate the effect of an intergenerational program on stereotyped attitudes towards elderly people and the wellbeing of older adults. | 101 elderly people; across two groups, age M= 74 (SD=7.7) and M=75 (SD= 5.21); 179 university students; Age M=19 (SD= 0.93); Both male and female participants. | Improved outcomes in depression measures in older adults who participated in an intergenerational exercise group.                          | Yes                  | Yes – adolescents only | Pre and post sessions that included questionnaires and geriatric depression scale. Analysis via repeated measure analysis of variance (ANOVA)                                         |
| <b>Wilson, Cordier[47]</b>        | Qualitative; Men's shed (Australia); 10 week intergenerational mentoring program over with older male mentors offering support to younger at risk males                              | To explore the experiences and perceptions of mentors involved in an occupation skill focussed program with teenage boys.                    | 9 teenage boys; Age ~15 years; 6 older male mentors; Age 60-75; a project facilitator and a youth worker. All participants were male.                           | Intergenerational programs involving older adults with a strong sense of generativity were shown to be a valuable resource to communities. | Yes                  | Yes- both groups       | Pre and post Individual interviews and focus groups with both groups however only reported on data from older adult participants using constant comparative method of grounded theory |



|                               |                                                                                                                                                                                     |                                                                                                                                                                                                 |                                                                                                                                                                                       |                                                                                                                                                      |     |                        |                                                                                                                                                                                                                                                      |
|-------------------------------|-------------------------------------------------------------------------------------------------------------------------------------------------------------------------------------|-------------------------------------------------------------------------------------------------------------------------------------------------------------------------------------------------|---------------------------------------------------------------------------------------------------------------------------------------------------------------------------------------|------------------------------------------------------------------------------------------------------------------------------------------------------|-----|------------------------|------------------------------------------------------------------------------------------------------------------------------------------------------------------------------------------------------------------------------------------------------|
| <b>Biggs and Knox[48]</b>     | Qualitative; Residential care/ assisted living (USA (Texas)); Girl scout meetings held in assisted living facility                                                                  | To identify impact of an intergenerational program for girl scouts (young people) and residents (older people) on quality of life, social interaction and personal attitudes.                   | Focus groups comprised of parents = 8, residents = 5, staff = 10, children (scouts and daisies) 5-12 years = 9; Content essay participants ages 6-16: n= 18; All participants female. | Intergenerational programs using social workers and community volunteers strengthened intergenerational relationships.                               | Yes | No                     | Focus group interviews with both groups and submitted essays from the younger participants followed by hematic analysis                                                                                                                              |
| <b>Knight, Skouteris[35]</b>  | Mixed Methods; Residential aged care setting (Australia); Development of a life story review book by adolescent students partnered with an older adult.                             | To pilot and test the feasibility of an intergenerational program "My Life Story".                                                                                                              | Adolescents n= 24; Age M= 14.56 (SD=0.5); Older adults n= 12; Age M=90.58 (SD=3.59); Gender of participants not stated                                                                | Improved social connectedness and community engagement resulted from an intergenerational program using reminiscence.                                | Yes | Yes- both groups       | Qualitative data collected (post) using semi-structured interviews and quantitative data collected (pre and post) using a series of items followed by thematic analysis and paired t-tests.                                                          |
| <b>Ostensen, Gjevjon[15]</b>  | Qualitative; Residential care facility or private home (Norway) Sessions over a 12-month period with volunteer adolescents supporting older adults to learn use of a tablet device. | To explore a new model of care that supports older people to participate by introducing technology and mobilising volunteer services.                                                           | Older adults n= 15 (5 withdrew due to illness, death and hospitalisation); Adolescents n=not stated; Age 54-94 years; Both male and female participants.                              | Reduction in anxiety and increase in social activity for older adults followed an intergenerational program supporting older adults to use an iPad.  | Yes | Yes- adolescents only  | Individual semi structured interviews repeated over a 12 month period with the older adults only followed by thematic analysis                                                                                                                       |
| <b>Santini, Tombolesi[49]</b> | Qualitative; Residential aged care facility (Italy); Intergenerational activity based meetings with aged care residents, older adult community volunteers and adolescents.          | To understand if creating community space and planning activities where adolescents, older adults, and active older volunteers meet and interact will improve health outcomes for older adults. | 14-year-old students n=25 (18 males and 7 females) and three teachers; 16 older residents; Age M=83; three social workers; 16 older volunteers; Age M=70                              | The intergenerational program improved the wellbeing of institutionalised older adults.                                                              | Yes | Yes- both groups       | Individual and focus groups Interviews with students; individual interview with older adults; focus groups with volunteers before, during and after the intervention followed by content analysis                                                    |
| <b>Wilson, Cordier[33]</b>    | Mixed methods; Men's shed (Australia); Intergenerational mentoring program with older adults and young adults with intellectual disability.                                         | To examine the feasibility of a novel Men's Shed intergenerational mentoring intervention for young adults with intellectual disability.                                                        | 5 mentees (average age 16); Older adult mentors n=12; Age M=69.5 (SD=8.53); All participants were male.                                                                               | Intergenerational mentoring interventions for youth with intellectual disability at community Men's Sheds were shown to be feasible and appropriate. | Yes | Yes- older adults only | Quantitative data via pre-and post-intervention outcome measures and descriptive data of mentees' functional skills. Qualitative data collected at end of project via individual interviews with mentees and mentors. Used realist evaluation method |

The characteristics of the included studies are provided in Table 1. In phase two of the review, data was analysed to 1) confirm the degree to which the a priori theories identified in phase one (see Table 2) were supported and 2) generate the contexts, mechanisms and outcomes from the included interventions.

### Quality Assessment

In line with recommendations for realist reviews[40] no studies were excluded following quality assessment, rather each study was ultimately assessed for its contribution to theory development and context mechanism outcome configurations. The quality assessment of each included study concluded with an overall estimate of how valuable the study was to the review (Low, Medium or High), a criterion based on Question 10 of the Critical Appraisal Skills Programme qualitative quality assessment tool[50]. The assessment concluded that majority of studies (7/9) were found to be of high value to the review[15, 33, 35, 37, 45, 47, 49]. These studies were rated as highly valuable due to the age range of participants fitting directly with the aims of this review and because they reported on intergenerational programs in detail and provided ample evidence to support their findings, facilitating the analytical process for this review. The Biggs et al.[51] and Hernandez and Gomez[46] studies were rated as being of medium value to the review. Biggs et al.[51] was assessed as lacking on detail with regard to the reporting of the findings, whereas Hernandez and Gomez[46] had limited age group relevance to the review aims as the younger age group had an average age of 19.

**Table 2: a priori theories identified after step one**

|                                                                                                                                                                                                             |
|-------------------------------------------------------------------------------------------------------------------------------------------------------------------------------------------------------------|
| Intergenerational programs involving adolescents and older adults improve social connectedness in the older adult group.                                                                                    |
| Intergenerational programs conducted in educational contexts result in positive outcomes in social connectedness for one/both groups.                                                                       |
| Because they are at a similar point in psychosocial development, adolescents and older people are likely to be mutual beneficiaries of intergenerational programs.                                          |
| Intergenerational programs help support meaningful connections for older people who may be socially disconnected within the community, with individuals outside of their normal age and social demographic. |
| Greater generativity is formed through participation in intergenerational programs.                                                                                                                         |
| Intergenerational programs conducted in educational contexts build community connections between generations and across structural community assets like schools.                                           |

When coupled with the *a priori* theories generated from phase one, context mechanism outcome configurations (CMOC) were developed. The CMOC are eight circumstances deemed optimal for the delivery of intergenerational programs involving older adults and adolescents and are hypothesised to improve outcomes in social connectedness. These are summarised in Table 3 below.

**Table 3: Summary of Context Mechanism Outcome Configurations**

| CMOC label and summary-level description                                                                                                                                                                                                                                                                                                                                                                                                                                                                                                                                                                                              | References of included studies |
|---------------------------------------------------------------------------------------------------------------------------------------------------------------------------------------------------------------------------------------------------------------------------------------------------------------------------------------------------------------------------------------------------------------------------------------------------------------------------------------------------------------------------------------------------------------------------------------------------------------------------------------|--------------------------------|
| <p><b>CMOC 1 Understand the participants psychosocial development phase and attitudes towards each other to foster generativity</b></p> <p>Adolescents and older adults are at a similar crossroads in the formation and maintenance of their identity[34] (context). Understanding the developmental phase and held attitudes of the participants (context) supports the design of program training activities (mechanism) and ‘ice breakers’ (mechanisms) that foster reciprocity (mechanism) and are more likely to trigger generativity (outcome) between the generational groups and improve social connectedness (outcome).</p> | All included studies           |
| <p><b>CMOC 2 Use a pedagogic framework to trigger generativity, intercommunity connections and deliver social health outcomes</b></p> <p>Pedagogic frameworks (context) motivate the adolescent to participate in intergenerational programs and achieve a result[35, 45, 48]. Similarly, the older adult is motivated to transfer skills and wisdom and provide support to the adolescent so as they can achieve their goal (mechanism). As a result, social connectedness and attitudes (outcomes) towards the other generational group improve.</p>                                                                                | All included studies           |
| <p><b>CMOC 3 Design the program to be frequent and have a clear structure to support participation and improved social connectedness</b></p> <p>Pedagogic frameworks (context) provide structure. Programs that are co-designed and scheduled frequently allow relationships to form through shared goals and activities (mechanisms). Frequent and carefully structured programs allow for improved social connectedness, and sustainable health and community benefits (outcomes).</p>                                                                                                                                              | All included studies           |
| <p><b>CMOC 4 Conduct the program in community settings to support social health outcomes and build social capital</b></p> <p>Community settings including educational institutions, care homes or existing community groups provide a foundation for engagement (context) when delivering intergenerational programs. Programs that showed a strong connection to the community through their facilitators (mechanism) or the physical environment (mechanism) showed improved sustainability and generalisability for the participants and the broader social capital of the community (outcome).</p>                                | [15, 33, 35, 45-47, 49]        |
| <p><b>CMOC 5 Deliver pre-program training and support participants to ‘break the ice’</b></p> <p>Utilising existing community settings and knowledge of psychosocial development, (contexts), pre-program training (mechanism) and activities that support participants to connect on a more informal level (mechanism) work together to bridge gaps between the generations (outcome).</p>                                                                                                                                                                                                                                           | [15, 33, 35, 45-47, 49]        |
| <p><b>CMOC 6 Identify shared goals between program participants to build reciprocity and support program engagement</b></p> <p>Through use of pedagogic frameworks and existing community links (contexts), the identification of shared goals builds reciprocity (mechanism) between the participants and in turn may trigger</p>                                                                                                                                                                                                                                                                                                    | [15, 33, 35, 45-47, 49]        |

|                                                                                                                                                                                                                                                                                                                                                                                                                                                                 |                             |
|-----------------------------------------------------------------------------------------------------------------------------------------------------------------------------------------------------------------------------------------------------------------------------------------------------------------------------------------------------------------------------------------------------------------------------------------------------------------|-----------------------------|
| benefits including a greater sense of generativity (outcome), improved wellbeing (outcome) and social connectedness (outcome).                                                                                                                                                                                                                                                                                                                                  |                             |
| <p><b>CMOC 7 Include a trained facilitator to promote program participation</b></p> <p>In a variety of contexts, the inclusion of a program facilitator (mechanism) may support improved social connectedness (outcome). The other key function of a facilitator is to ensure that the participants have had the opportunity to ‘break the ice’ (mechanism) through pre-program training and informal opportunities such as morning tea times.</p>              | [33, 35, 45-47, 49]         |
| <p><b>CMOC 8 Plan inclusive activities that trigger generativity and improve physical, cognitive, psychological and social outcomes</b></p> <p>When programs use existing community connections, include relationship-based activities with a shared goal (mechanisms) and are grounded in a pedagogic framework (contexts), there is improvement in health and social wellbeing (outcome) and a sense of generativity for the older adult group (outcome).</p> | [15, 33, 35, 37, 45-47, 49] |

### **CMOC 1 Understand the participant’s psychosocial development phase and attitudes towards each other to foster generativity and connection**

In the included studies, pre-program psychometric measurement[33, 35, 37, 46], focus groups or interviews[47] and informal gatherings at the beginning of the program[15, 33, 35, 46, 47, 49] were used to understand the demographic and psychosocial characteristics of participants. Psychometric scales that measured attitudes towards ageing, social connectedness, loneliness, generativity and presence of depression were completed pre and post intervention[33, 35, 37, 46]. Pre-program focus groups and interviews were used with both groups[33, 47, 49] to understand participant skills and motivations. This information was used to align participants based on skills and expectations, understand participant relationships with other generations, their attitudes towards ageing and their perceptions of self [49]. Understanding baseline attitudes helped structure programs to promote alternate views of an older person’s capability, foster dialogue and enhance learning between generations.

Evidence from the included studies indicates that using pre-program measures to understand participant demographics, including their psychosocial phase and cognitive and physical abilities leads to a more likely match in participant capability and outcomes that improve social connectedness and generativity.

### **CMOC 2 Use a pedagogic framework to trigger generativity, intercommunity connections and deliver social health outcomes**

Pedagogic or service-learning frameworks support participants to learn together in a real-world context[5, 52] and featured in six of the included studies[33, 35, 46-49]. Studies that involved school students were aged between 13-19 years with 15 years the average age across studies[33, 35, 45, 47, 49]. Two studies[35, 49] involved students completing a report or a community

1 presentation, whilst others involved students completing a small woodwork project[33, 47]. These  
2 tasks were curriculum linked[35], motivating adolescent participants to complete the task. Older  
3 adults reported they felt needed when they were contributing to adolescent's learning and  
4 acknowledged the adolescent's contribution to their own learning - "*they can teach us the*  
5 *computer and their new language*"[49]  
6  
7  
8  
9

10 Through the use of a pedagogic framework, results showed improved understanding and respect  
11 for the other generation[47, 48] and older adults gained a sense of pride in being able to pass on  
12 their knowledge and wisdom. These findings provide evidence that in pedagogic contexts, where  
13 reciprocity is formed, it is likely that an improvement in perceived social connectedness and  
14 wellbeing will occur for the older adult.  
15  
16  
17  
18  
19

### 20 **CMOC 3 Design the program to be frequent and have a clear structure to support participation** 21 **and improved social connectedness**

#### 22 *Frequency and duration of sessions*

23 Programs that used a pedagogic framework were usually linked to a school term or semester[33,  
24 45-47, 49]. These programs ranged from six to twelve - week blocks, often repeating over school  
25 terms. Programs that were held weekly[15, 33, 35, 46, 47], fortnightly[45, 49] or bi-monthly[48].  
26 Biggs and Knox[48] reported less frequent sessions were chosen to avoid overwhelming the  
27 participants, compared to other participants who requested more frequent and extended  
28 program sessions so they could spend more time together[33, 45, 47, 49].  
29  
30  
31  
32  
33  
34  
35

#### 36 *Structure of sessions*

37 A clear program structure that included pre-training and time for "breaking the ice"[33, 47] was  
38 reported as beneficial. Typically, studies used the session to engage and introduce participants  
39 or complete training and the following weeks to cover different topics or questions relating to  
40 the aim of the study. In the Ostensen[15] study, older adults raised learning goals that formed  
41 the structure for the week ahead. Overall, evidence suggests that having a structured program  
42 that allows frequent interaction between generational participants is more likely to result in  
43 improved social connectedness and optimised health and wellbeing.  
44  
45  
46  
47  
48  
49  
50

### 51 **CMOC 4 Conduct the program in community settings to support social health outcomes and** 52 **build social capital**

53 Intergenerational programs that occur in community settings provide a platform for building social  
54 capital[4, 9, 26]. Four studies conducted programs in residential care facilities using existing  
55 community connections such as local youth clubs and schools that were geographically close by  
56 [15, 35, 48, 49] and two others[33, 46, 47] leveraged local community programs (volunteer  
57 groups). Evidence suggested that community-based programs had greater potential in enhancing  
58  
59  
60

1 social health outcomes for older adults and generating social capital in the broader community.  
2  
3 In the Biggs and Knox[48] study, older adult participants began attending church with the families  
4 of the adolescents, demonstrating connections beyond the program. Similar results were reported  
5 in the de Souza[45] study with older participants reflecting improved mood, physical wellbeing  
6 and a *'feeling of freedom'* (p. 467), through their opportunities to get out of the facility and spend  
7 time with the adolescents in the community. The location, existing relationships between  
8 community organisations and activities that support participants to observe the other generation  
9 playing a role in the community are all positive predictors of a likely improvement in individual  
10 and community social connectedness and wellbeing.  
11  
12  
13  
14  
15  
16

### 17 **CMOC 5 Deliver pre-program training and support participants to 'break the ice'**

18  
19 Pre-program training was provided in six of the nine included studies. Training was offered to older  
20 adults and the adolescents[33, 35, 49], to older adults only[33] or to adolescents only[15, 46].  
21  
22 Training included program orientation or the opportunity to learn about the other generation.  
23  
24

25 Where training was provided to both the adolescents and older adults, this appeared to foster  
26 social connections. For example, the adolescents shook the hands of the older gentleman at the  
27 beginning and end of each session. This positive social behaviour was felt by the older men to be  
28 respectful and demonstrated social connectedness between the groups[47]. However, in the  
29 Santini[49] study, despite the pre-program introductory material, students reported that they  
30 required support from teachers and older adult volunteers to overcome their emotions when they  
31 met with the older adults for the first time.  
32  
33  
34  
35  
36  
37

38 The Wilson et al[33] program provided training to the older adult mentors only. This training  
39 provided the mentors with disability awareness training via videos. Despite this, it was highlighted  
40 by the older adults that they would have liked to have been more prepared for working with the  
41 adolescents with intellectual disability. Two studies provided training to adolescents only[15, 46]  
42 however did not report on the impact of this training.  
43  
44  
45  
46

47 In studies where no formal pre-program training was provided, results were mixed in relation to  
48 the impact on the program. In the Kessler and Staudinger[37] study, the randomised control trial  
49 methodology required pre-program blinding. In the Biggs and Knox[48] study, the participants  
50 were already involved in an existing Scouts program, so it is assumed that pre-program education  
51 was included in Scout club activities, however, this was not reported by the authors. Parents of  
52 the adolescents in the Biggs and Knox[48] raised concern about their children's reactions to  
53 residents with dementia or if a resident died. There were also reports from the residents and  
54 parents that boundaries and behaviours were not respected by the adolescent participants. These  
55 examples indicate a role for pre-program training to reduce fears and provide education. Where  
56  
57  
58  
59  
60

1 training or opportunities to interact were sub-optimal or missing, participants highlighted limited  
2 opportunities to 'get to know' each other or feel prepared for the program[33, 45]. If comfort or  
3 confidence in the program is not established, participants may not participate[45] or be reluctant  
4 to participate again[33]. This has broader implications for the sustainability of program outcomes,  
5 particularly those that aim to enhance social capital or galvanise links between community groups.  
6  
7  
8  
9

### 10 **CMOC 6 Identify shared goals between program participants to build reciprocity and support** 11 **program engagement**

12  
13  
14  
15 By understanding the shared aims of participants, reciprocity is nurtured, participants are more  
16 motivated, and generativity is triggered. Where participants were involved in program design[46,  
17 49] as well as iteratively throughout the course of the program[15, 48] the program was more  
18 person centred, enhanced reciprocal behaviours and improved outcomes.  
19  
20  
21

22  
23 The Santini[49] study used an action participatory research approach with active older adult  
24 volunteers, social workers and teachers and Hernandez and Gonzalez[46] used a co-design  
25 approach through adolescent students designing an exercise program for older adults that was  
26 delivered with support from lecturers and trained facilitators over 32 sessions. Both generations  
27 benefited in these programs, with results indicating a positive shift in age related stereotypes  
28 when older adults and adolescents interacted as part of the program.  
29  
30  
31

32  
33 In programs where there was a shared goal from the outset there was greater improvement in  
34 social connectedness[33, 35, 47, 48], reduced markers for depression[46] and stereotypical  
35 attitudes towards the older generation[48]. The included studies demonstrate that creating  
36 reciprocity drives generative behaviour. Reciprocity and generativity combined leads to improved  
37 social connectedness and health and wellbeing outcomes for the individual and the community  
38 broadly.  
39  
40  
41  
42  
43

### 44 **CMOC 7 Include a trained facilitator to promote participation**

45  
46 Facilitation is the act of supporting and enabling a group to meet its objectives (and release its full  
47 potential) by fostering conditions that respects and encourages contributions by all members of  
48 the group[53]. Facilitation was used in seven of the included studies. The facilitators were trained  
49 professionals including teachers[35, 49], university staff[46], fitness instructors[46], health  
50 professionals[15, 33, 48], community leaders[48] and youth workers[47]. In the Santini[49] study,  
51 active older volunteers also played a facilitation role. Studies that included a facilitator resulted in  
52 greater participant interaction and improved program outcomes[33, 47, 49]. In the Wilson et al  
53 study, the youth worker that facilitated the program was described as responsible for "*keeping us*  
54 *on track*"[47] and was pivotal in prompting participation between the groups, for example at  
55 afternoon tea breaks.  
56  
57  
58  
59  
60



1  
2  
3  
4  
5  
6  
7  
8  
9  
10  
11  
12  
13  
14  
15  
16  
17  
18  
19  
20  
21  
22  
23  
24  
25  
26  
27  
28  
29  
30  
31  
32  
33  
34  
35  
36  
37  
38  
39  
40  
41  
42  
43  
44  
45  
46  
47  
48  
49  
50  
51  
52  
53  
54  
55  
56  
57  
58  
59  
60

In the study involving girl Scout groups[48], the troop leaders were trained social workers. Whilst their individual experiences were not reported in the findings, the role they played in bringing together individuals connected to existing community settings in girl Scouts, residential aged care and volunteer groups was fundamental in the program longevity and results. In four studies, active adult[33, 47, 49] and adolescent[15] volunteers were recruited from local community volunteer groups and provided additional program facilitation support that likely enhanced positive outcomes in community engagement and social connectedness.

Conversely, in studies where the facilitation was reported as being sub-optimal[33] or absent[45], the participants and the authors highlighted that greater support from the teachers, researchers or 'monitors' would have enhanced interactions between the generational groups. If facilitation is absent or lacking, participants may feel frustrated or unsupported, in turn causing participant disengagement, attrition or an unintended triggering of age-based stereotypes or perceived loneliness[49]. Trained facilitation supports improved connectedness between participants and when delivered within community and pedagogic contexts, favourable outcomes in generativity, social connectedness, and social capital.

**CMOC 8 Plan inclusive activities that trigger generativity and improve physical, cognitive, psychosocial, and social outcomes**

Included studies reported on programs that provided relationship-based inclusion[35, 45, 48, 49] and activity-based inclusion[15, 33, 46, 47] opportunities for participants.

Relationship-based inclusion:

If there is limited opportunity for relationship-based inclusion, adolescents and older adults are at risk of not experiencing meaningful social connection[35]. Feeling included by peers and the broader community promotes generativity and in turn improves wellbeing in both age groups[23, 35]. Several programs[35, 45, 48, 49] used relationship-based inclusion activities such as reminiscence (sharing old photos or learning about what jobs older people used to do) to create reciprocity between older adults and adolescents. This was also a mechanism to improve physical, cognitive, and psychological health, and in turn social connectedness. A marker of sustained relationships was demonstrated by the adolescents continuing to connect with older adults after the program[35, 49], including volunteering at a local community organisation with older people.

Activity-based inclusion:

Studies that used activity-based inclusion such as exercise programs[46], digital literacy training with an iPad[15] or woodwork construction[33, 47] also reported improved outcomes in physical, cognitive, psychological and social domains, including social connectedness. In the



1 studies set in Men's Shed's the young adults were mentored by the older men in occupational  
2 activities, with both groups reporting the activities provided the opportunity to connect, whilst  
3 learning new skills and doing "*something with our hands*"[47]. Young adults with intellectual  
4 disability commented that the Men's Shed was a unique learning environment - "*they made me*  
5 *feel like part of the group*" and that they "*felt accepted*"[33]. Older adults supported to use a  
6 tablet device[15] demonstrated improved social outcomes as they were able to connect with  
7 family in other locations or the outside community through news applications or by tracking  
8 weather. Nurses in the care facility reported a change in social behaviour in the participants  
9 using iPads, taking more initiative, presenting as less anxious and being more socially active. In  
10 the Hernandez and Gonzalez[46] study, the interaction between adolescents and older people  
11 showed statistically significant improvement in depression scores and stereotypical attitudes in  
12 the older adult group. A comparison group led by the adult trainer resulted in a less significant  
13 change in depression scores in the older adults (Group 1 with adolescents=  $p < .001$ ; Group 2 led  
14 by adult trainer =  $p < .008$ ). The control group (who attended the local social centre but did not  
15 interact with the adolescents or participate in exercise sessions) showed a statistically significant  
16 increase in depressive symptoms ( $p < .001$ ). The evidence supports activities that provide the  
17 participating generations with the opportunity to share time, reminisce and develop  
18 relationships are powerful mechanisms for triggering generativity and social connectedness.  
19  
20  
21  
22  
23  
24  
25  
26  
27  
28  
29  
30  
31

### 32 **Logic model**

33 The aim of this review is to identify the circumstances in which social connectedness is optimised  
34 for older adults when taking part in intergenerational interventions with adolescents. The logic  
35 model below represents the relationships between program activities and improved social  
36 connectedness for older adults. As demonstrated through the CMOC, the act of two generations  
37 coming together in familiar community-based contexts with a shared purpose, resulted in  
38 strengthened relationships and community connections. Several participants in the included  
39 studies spoke about the benefit of having an opportunity to 'meet and greet' for example by  
40 sharing an afternoon tea as part of the program[33, 35, 47-49].  
41  
42  
43  
44  
45  
46  
47  
48

49 This logic model (presented in Figure 2 below) uses a nested visual to represent an optimal  
50 intergenerational program to improve social connectedness in older adults. The circumstances  
51 being the outer circle, with the mechanisms within that, driving the outcomes at the core.  
52  
53  
54  
55  
56  
57  
58  
59  
60

1  
2  
3  
4  
5  
6  
7  
8  
9  
10  
11  
12  
13  
14  
15  
16  
17  
18  
19  
20  
21  
22  
23  
24  
25  
26  
27  
28  
29  
30  
31  
32  
33  
34  
35  
36  
37  
38  
39  
40  
41  
42  
43  
44  
45  
46

**\*Insert here\_Figure 2: Logic model**

For peer review only

## DISCUSSION

Evidence from the included studies reveals how intergenerational programs involving adolescents can address issues of social disconnectedness in older adults. This review identifies how and why intergenerational programs work, for whom and in what circumstances. Broadly, the CMOC cover four main themes - 1) psychosocial and mental health, 2) physical and cognitive health, 3) program design and structure and 4) community engagement and social capital.

### **Psychosocial and mental health**

Providing opportunities for older adults to participate, without being infantilized or inequitably treated is highlighted by the included studies and others as a mechanism for improving reciprocity and generativity[20, 37, 54]. The opportunity to participate in an intergenerational program saw older adults improve their own self-image and stereotypical view of old age and prove to themselves that they still had something to offer the community and the younger generation[45, 46, 49]. Included programs that created opportunities for informal, relationship-based activities which triggered generativity, for example promoting conversation between the generational groups, were of greatest benefit to psycho-social health[35, 45, 49].

### **Physical and cognitive health**

The impact of intergenerational programs on broader health outcomes, including cognitive health has been previously reported[14, 55]. The connections between social, cognitive and physical health are well known, particularly in high-risk populations like older adults[56-58]. In this review, interventions that promoted the older adult as wise or expert[33, 35, 37, 47, 48] showed improvement in both perceived and measured cognitive performance. Kessler and Staudinger[37] showed improvement in speed of processing and word fluency when older adults were paired with an adolescent and asked to solve a 'life problem'. Qualitative evidence from included studies reported improved physical health in older adults as a result of their involvement in the intergenerational program, including increased energy[33] reduced pain[49] and increased movement[45].

### **Program design and structure**

A range of designs and structures are reported in the intergenerational program literature. Intergenerational programs embedded within pedagogic contexts are supported by existing literature[26, 59, 60] and were featured in many of the included studies. Several studies support the need for in depth, sustainable and accessible intergenerational programs to address social health issues[19, 61]. As highlighted by Cattani et al.,[62] programs that engage adults in the planning and design of the interaction are most effective. This was seen in the Ostensen[15] study

1 and the Wilson et al.,[33] study that highlighted the use of co-design to optimise outcomes.  
2  
3 Martins et al.,[31] in a review of intergenerational programs also highlighted the benefit of weekly  
4 or fortnightly intergenerational meetings to create bonds between participants.  
5  
6

7 Several of the included studies highlighted the importance of informal and formal program  
8 structures to build a foundation for connection. Several interventions leveraged existing local  
9 community connections and pre – program training was shown to support participation[33, 45,  
10 49]. However, where complex demographics exist, additional program support may be  
11 required[33, 45, 49].  
12  
13  
14  
15

### 16 **Community engagement and social capital**

17  
18 Programs set in the community that leveraged existing community connections were more likely  
19 to promote social connectedness. Individuals already engaged with the community in a volunteer  
20 capacity were participants, and in some cases facilitators of the program. Other reviews[21]  
21 support the inclusion of volunteers as it is a cost effective way to deliver programs and promote  
22 volunteerism- a key element for enhancing social capital. Volunteers were used in the included  
23 studies to support program delivery and participant recruitment via community organisations like  
24 Rotary or Scouts[15, 33, 47-49]. Adolescents also witnessed volunteer ‘models’ and were  
25 interested in volunteerism beyond the program[15, 35, 49].  
26  
27  
28  
29  
30  
31  
32

### 33 **Strengths and limitations of this review**

34  
35 This realist review explored intergenerational programs that specifically involved adolescents  
36 and their impact on social connectedness in older adults and developed inclusion and exclusion  
37 criteria to reflect this aim. Whilst these criteria generated a targeted group of studies for review,  
38 there may have been additional studies missed. The included studies showed some collective  
39 limitations including a lack of participant diversity in regard to gender and rurality. From the  
40 information reported, most studies were conducted in metropolitan environments. The  
41 importance of building capacity in rural communities to protect the social health of older adults  
42 is supported by Hodgkin et al.[6] and this lacking insight is one limitation of this review. In  
43 regards to gender, three studies specifically recruited based on gender given they were located  
44 in Men’s sheds[33, 47] or focused on girls scouts[48], however in other studies where gender did  
45 not appear to be a structural factor, there was a greater proportion of women over men who  
46 participated. This is a possible limitation of the review along with the limited participation of  
47 older adults with cognitive impairment, particularly in quantitative measurement[15, 35, 48].  
48 There were also noted limitations in the quality of some studies with a paucity of evidence from  
49 the intervention, however these studies remained included in the review given their value to the  
50 overall review question and the commitment in realist methodology not to exclude solely based  
51  
52  
53  
54  
55  
56  
57  
58  
59  
60

1 on quality of evidence[38]. An additional limitation is that only studies published in English were  
2 considered.  
3  
4  
5  
6  
7

8 This review is however strengthened by its specific focus and that it is the first realist review to  
9 explore the impact of intergenerational programs specifically involving adolescents on social  
10 connectedness in older adults. In addition, the review included a variety of study methods  
11 including one randomised control trial. The inclusion of evidence developed using a variety of  
12 methods is supported by the realist review methodological standards as it provides a broad view  
13 of existing literature and evidence is included based on its value and contribution to the review  
14 aim, rather than singularly on methodological type. As a result, the included studies report on a  
15 variety of different programs from several major continents. Whilst this heterogeneity may be  
16 viewed as a limitation, the realist method supports using a wide range of evidence to  
17 understand the circumstances in which complex interventions deliver an intended outcome. The  
18 review may have been further strengthened by the opportunity to test the program theories and  
19 logic with stakeholder groups.  
20  
21  
22  
23  
24  
25  
26  
27  
28

### 29 **Implications for practice and future research**

30 This review has provided a logic model that is ready to use by clinicians, program managers and  
31 policy makers in the design and implementation of community based intergenerational  
32 interventions. This review has implications for targeting physical, social, and mental health in older  
33 adults, as well as exploring opportunities for the role of intergenerational programs in adolescent  
34 health. Furthermore, the program theory provides a suggested approach for designing programs  
35 with a broader system lens. Previous literature has also supported the use of intergenerational  
36 programs[63], in particular those with a social health focus, to counter loneliness[64], influence  
37 age related health outcomes[17] and reduce costs associated with increased care needs in older  
38 age[15, 65].  
39  
40  
41  
42  
43  
44  
45  
46  
47

48 The review also provides support for the inclusion of intergenerational programs into the  
49 curriculum to influence adolescent career choices and to improve attitudes towards older  
50 people[35, 45, 49]. Included studies also called for intergenerational programs to be a “systematic  
51 component of care provision”[49] for older adults living in residential aged care, including  
52 additional resources, changes to models of care and staff training[15].  
53  
54  
55  
56

57 Future research where intergenerational interventions are 1) designed using the program theory  
58 as articulated within the logic model and 2) tested with stakeholders, may support further  
59 understanding what works for whom, and in what circumstances. Realist evaluation or other  
60 published frameworks like the 6-SQUID model[66, 67] are methodological options for future

1 projects. This style of participatory research generates community will and engagement and  
2 supports sustainability without major resource investment, as the community itself 'owns' and is  
3 committed to the intervention they have designed. Future research would also benefit from  
4 addressing the same theory in comparative or specific settings[39], such as in aged care settings  
5 or community groups like Men's sheds.  
6  
7  
8  
9

## 10 **CONCLUSION**

11 This review has identified the circumstances in which social connectedness is optimised for older  
12 adults when taking part in intergenerational interventions with adolescents. Findings have  
13 provided a logic model outlining how intergenerational programs involving adolescents are likely  
14 to improve social connectedness for older adults and builds on the evidence that social  
15 connectedness and social networks are protective for immunity, reduced depression rates and a  
16 reduced risk of frailty[16, 56, 68].  
17  
18  
19  
20  
21  
22  
23

24 In addition to the psychosocial development theory, this review has uncovered the optimal  
25 circumstances that promote social connectedness for older adults. These include setting programs  
26 in the community, including a trained facilitator, leveraging a pedagogic framework and finding  
27 shared goals between participants. Structural elements such as pre-program training and  
28 frequency of sessions was shown to be important in delivering relationship bonds between older  
29 adults and adolescents, that trigger generative behaviours and greater perceived social  
30 connectedness. Intergenerational programs involving adolescents are a possible solution for  
31 enhancing social connectedness and health outcomes for older adults.  
32  
33  
34  
35  
36  
37  
38  
39  
40  
41  
42  
43  
44  
45  
46  
47  
48  
49  
50  
51  
52  
53  
54  
55  
56  
57  
58  
59  
60

### **Authors' contributions**

JS, HV and DA conceived of the project and contributed to the development of the manuscript. JS led the review, HV and DA were the co-reviewers. All authors read and approved the final manuscript.

### **Conflict of interest declaration**

The authors declare no conflict of interest and take sole responsibility for the content of this article.

### **Data sharing statement**

All included articles are available publicly. The data extracted from these articles can be made available upon request.

### **Funding**

This research was undertaken in part fulfilment of a Master of Public Health degree by JS and did not receive any specific funding.

### **Ethics Approval**

This study did not require ethical approval

### **Acknowledgments**

We would like to acknowledge support from the La Trobe University library staff in conducting initial literature search. We would also like to thank the stakeholders who gave their time to participate in the early stages of this review.

## REFERENCES

1. Grenade L, Boldy D. Social isolation and loneliness among older people: issues and future challenges in community and residential settings. *Australian Health Review*. 2008;32(3):468-78.
2. White H, McConnell E, Clipp E, et al. A randomized controlled trial of the psychosocial impact of providing internet training and access to older adults. *Aging & mental health*. 2002;6(3):213-21.
3. Morton TA, Wilson N, Haslam C, et al. Activating and Guiding the Engagement of Seniors With Online Social Networking: Experimental Findings From the AGES 2.0 Project. *Journal of Aging and Health*. 2018;30(1):27-51.
4. Haslam C. *The New Psychology of Health : Unlocking the Social Cure*. Jetten J, Cruwys T, Dingle G, Haslam A, Haslam C, editors: Florence : Routledge; 2018.
5. Andreoletti C, Howard JL. Bridging the generation gap: Intergenerational service-learning benefits young and old. *Gerontology and Geriatrics Education*. 2018;39(1):46-60.
6. Hodgkin SP, Warburton J, Hancock S. Predicting wellness among rural older Australians: a cross-sectional study. *Rural and remote health*. 2018;18(3):4547.
7. Mellor D, Firth L, Moore K. Can the Internet Improve the Well-being of the Elderly? *Ageing International*. 2008;32(1):25-42.
8. Nycyk M, Redsell M. Intergenerational Relationships and Community Computer Training: Overcoming the Digital Divide. *Journal of Intergenerational Relationships*. 2011;9(1):85-9.
9. Coll-Planas L, Nyqvist F, Puig T, et al. Social capital interventions targeting older people and their impact on health: a systematic review. *J Epidemiol Community Health*. 2017;71(7):663-72.
10. Kaplan M, Sanchez M, Hoffman J. *Intergenerational Strategies for Sustaining Strong Communities. Intergenerational Pathways to a Sustainable Society*. Cham: Springer International Publishing; 2017. p. 109-39.
11. Dickens AP, Richards SH, Greaves CJ, et al. Interventions targeting social isolation in older people: a systematic review. *BMC Public Health*. 2011;11(1):647.
12. Hagan R, Manktelow R, Taylor BJ, et al. Reducing loneliness amongst older people: a systematic search and narrative review. *Aging Ment Health*. 2014;18(6):683-93.
13. Choi M, Kong S, Jung D. Computer and internet interventions for loneliness and depression in older adults: a meta-analysis. *Healthcare informatics research*. 2012;18(3):191.
14. Ronzi S, Orton L, Pope D, et al. What is the impact on health and wellbeing of interventions that foster respect and social inclusion in community-residing older adults? A systematic review of quantitative and qualitative studies. *Syst*. 2018;7(1):26.
15. Ostensen E, Gjevjon ER, Oderud T, et al. Introducing Technology for Thriving in Residential Long-Term Care. *J Nurs Scholarsh*. 2017;49(1):44-53.
16. Berkman LF, Glass T, Brissette I, et al. From social integration to health: Durkheim in the new millennium. *Social science & medicine (1982)*. 2000;51(6):843-57.



17. Glass TA, De Leon CFM, Bassuk SS, et al. Social Engagement and Depressive Symptoms in Late Life: Longitudinal Findings. *Journal of aging and health*. 2006;18(4):604-28.
18. Buffel T, Phillipson C. Can global cities be 'age-friendly cities'? Urban development and ageing populations. *Cities*. 2016;55:94-100.
19. Gualano MR, Voglino G, Bert F, et al. The impact of intergenerational programs on children and older adults: a review. *International Psychogeriatrics*. 2018;30(4):451-68.
20. Bagnasco A, Hayter M, Rossi S, et al. Experiences of participating in intergenerational interventions in older people's care settings: A systematic review and meta-synthesis of qualitative literature. *J Adv Nurs*. 2020;76(1):22-33.
21. Springate I, Atkinson, M., & Martin, K. *Intergenerational Practice: a Review of the Literature*. 2008.
22. Gamliel T, Gabay N. Knowledge Exchange, Social Interactions, and Empowerment in an Intergenerational Technology Program at School. *Educational Gerontology*. 2014;40(8):597-617.
23. Kaplan M. The benefits of intergenerational community service projects: Implications for promoting intergenerational unity, community activism, and cultural. *Journal of Gerontological Social Work*. 1997;27(3):211-28.
24. Newman S, Hatton-Yeo A. Intergenerational learning and the contributions of older people. *Ageing horizons*. 2008;8(10):31-9.
25. Schroeder K, Ratcliffe SJ, Perez A, et al. Dance for Health: An Intergenerational Program to Increase Access to Physical Activity. *Journal of Pediatric Nursing*. 2017;37:29-34.
26. Kaplan MS. Intergenerational programs in schools: Considerations of form and function. *International Review of Education*. 2002;48(5):305-34.
27. Leedahl SN, Brasher MS, Estus E, et al. Implementing an interdisciplinary intergenerational program using the Cyber Seniors® reverse mentoring model within higher education. *Gerontology & geriatrics education*. 2018:1-19.
28. Breck BM, Dennis CB, Leedahl SN. Implementing reverse mentoring to address social isolation among older adults. *Journal of Gerontological Social Work*. 2018:1-13.
29. Zhong S, Lee C, Foster MJ, et al. Intergenerational communities: A systematic literature review of intergenerational interactions and older adults' health-related outcomes. *Social science & medicine*. 2020;264:113374.
30. Giraudeau C, Bailly N. Intergenerational programs: What can school-age children and older people expect from them? A systematic review. *European Journal of Ageing*. 2019:1-14.
31. Martins T, Midão L, Martinez Veiga S, et al. Intergenerational programs review: Study design and characteristics of intervention, outcomes, and effectiveness. *Journal of Intergenerational Relationships*. 2019;17(1):93-109.
32. Phang JK, Kwan YH, Yoon S, et al. Digital Intergenerational Program to Reduce Loneliness and Social Isolation Among Older Adults: Realist Review. *JMIR aging*. 2023;6(1):e39848.
33. Wilson NJ, Cordier R, Ciccarelli M, et al. Intergenerational mentoring at Men's Sheds: A feasibility study. *J Appl Res Intellect Disabil*. 2018;31(1):e105-e17.

- 1
  - 2
  - 3
  - 4
  - 5
  - 6
  - 7
  - 8
  - 9
  - 10
  - 11
  - 12
  - 13
  - 14
  - 15
  - 16
  - 17
  - 18
  - 19
  - 20
  - 21
  - 22
  - 23
  - 24
  - 25
  - 26
  - 27
  - 28
  - 29
  - 30
  - 31
  - 32
  - 33
  - 34
  - 35
  - 36
  - 37
  - 38
  - 39
  - 40
  - 41
  - 42
  - 43
  - 44
  - 45
  - 46
  - 47
  - 48
  - 49
  - 50
  - 51
  - 52
  - 53
  - 54
  - 55
  - 56
  - 57
  - 58
  - 59
  - 60
34. Erikson EH. *Childhood and society*. Rev. ed.. ed. London: London Vintage; 1995.
35. Knight T, Skouteris H, Townsend M, et al. The act of giving: a pilot and feasibility study of the My Life Story programme designed to foster positive mental health and well-being in adolescents and older adults. *International Journal of Adolescence and Youth*. 2017;22(2):165-78.
36. Zacher H, Esser L, Bohlmann C, et al. Age, social identity and identification, and work outcomes: a conceptual model, literature review, and future research directions. *Work, Aging and Retirement*. 2019;5(1):24-43.
37. Kessler E, Staudinger UM. Intergenerational potential: effects of social interaction between older adults and adolescents. *Psychology & Aging*. 2007;22(4):690-704.
38. Wong G, Greenhalgh T, Westhorp G, et al. RAMESES publication standards: realist syntheses. *BMC Med*. 2013;11(1):21.
39. Pawson R, Greenhalgh T, Harvey G, et al. Realist review--a new method of systematic review designed for complex policy interventions. *Journal of health services research & policy*. 2005;10 Suppl 1:21.
40. Pawson R. *Evidence-based policy: a realist perspective*: sage; 2006.
41. Rycroft-Malone J, McCormack B, Hutchinson A, et al. Realist synthesis: illustrating the method for implementation research. *Implement Sci*. 2012;7(1):33.
42. Wong G, Westhorp G, Manzano A, et al. RAMESES II reporting standards for realist evaluations.(Report). *BMC Med*. 2016;14(1).
43. Long A. Evaluative tool for mixed method studies. University of Leeds, School of Healthcare[online]. 2005;24:2017.
44. Critical Appraisal Skills Programme (CASP). CASP qualitative checklists [online]. 2018.
45. de Souza EM. Intergenerational interaction in health promotion: a qualitative study in Brazil. *Rev Saude Publica*. 2003;37(4):463-9.
46. Hernandez CR, Gonzalez MZ. Effects of intergenerational interaction on aging. *Educational Gerontology*. 2008;34(4):292-305.
47. Wilson NJ, Cordier R, Wilson Whatley L. Older male mentors' perceptions of a Men's Shed intergenerational mentoring program. *Australian Occupational Therapy Journal*. 2013;60(6):416-26.
48. Biggs MJG, Knox KS. Lessons Learned from an Intergenerational Volunteer Program: A Case Study of a Shared-Site Model. *Journal of Intergenerational Relationships*. 2014;12(1):54-68.
49. Santini S, Tombolesi V, Baschiera B, et al. Intergenerational Programs Involving Adolescents, Institutionalized Elderly, and Older Volunteers: Results from a Pilot Research-Action in Italy. *BioMed Research International*. 2018:1-14.
50. Programme CAS. CASP qualitatve checklist. 2018.
51. Biggs S, Lowenstein A. *Generational intelligence a critical approach to age relations*2013. 1-181 p.
52. Kaplan MS. *School-based intergenerational programs*: Citeseer; 2001.

- 1  
2  
3 53. Affairs IoC. What is facilitation? 2019 [cited 2022 October]. Available from: <https://ica-uk.org.uk/what-we-mean-by-facilitation/>.  
4  
5  
6  
7 54. Salari SM. Intergenerational partnerships in adult day centers: Importance of age-appropriate environments and behaviors. *The Gerontologist*. 2002;42(3):321-33.  
8  
9 55. Harris PB, Caporella CA. An Intergenerational Choir Formed to Lessen Alzheimer's Disease Stigma in College Students and Decrease the Social Isolation of People With Alzheimer's Disease and Their Family Members: A Pilot Study. *American Journal of Alzheimer's Disease & Other Dementias*. 2014;29(3):270-81.  
10  
11  
12  
13  
14  
15 56. Feng Z, Lugtenberg M, Franse C, et al. Risk factors and protective factors associated with incident or increase of frailty among community-dwelling older adults: A systematic review of longitudinal studies. *PLoS ONE*. 2017;12(6):e0178383.  
16  
17  
18  
19 57. Gleibs IH, Haslam C, Haslam SA, et al. Water clubs in residential care: Is it the water or the club that enhances health and well-being? *Psychology & health*. 2011;26(10):1361-77.  
20  
21  
22  
23 58. Sakurai R, Yasunaga M, Murayama Y, et al. Long-term effects of an intergenerational program on functional capacity in older adults: Results from a seven-year follow-up of the REPRINTS study. *Archives of Gerontology and Geriatrics*. 2016;64:13-20.  
24  
25  
26  
27 59. Whitehouse P, Bendezu E, Fallcreek S, et al. Intergenerational community schools: a new practice for a new time. *Educational Gerontology*. 2000;26(8):761-70.  
28  
29  
30 60. Dauenhauer J, Steitz DW, Cochran LJ. Fostering a new model of multigenerational learning: Older adult perspectives, community partners, and higher education. *Educational Gerontology*. 2016;42(7):483-96.  
31  
32  
33  
34 61. Murayama Y, Murayama H, Hasebe M, et al. The impact of intergenerational programs on social capital in Japan: a randomized population-based cross-sectional study. *BMC Public Health*. 2019;19(1):1-9.  
35  
36  
37  
38 62. Cattan M, White M, Bond J, et al. Preventing social isolation and loneliness among older people: a systematic review of health promotion interventions. *Ageing and Society*. 2005;25(01):41-67.  
39  
40  
41  
42 63. Radford K, Gould R, Vecchio N, et al. Unpacking intergenerational (IG) programs for policy implications: A systematic review of the literature. *Journal of Intergenerational Relationships*. 2018;16(3):302-29.  
43  
44  
45  
46 64. Price B. Approaches to counter loneliness and social isolation. *Nursing Older People*. 2015;27(7):31-9.  
47  
48  
49  
50 65. Ferguson L. Tackling loneliness in older age – why we need action by all ages. *Quality in Ageing & Older Adults*. 2012;13(4):264-9.  
51  
52  
53 66. Belford M, Robertson T, Jepson R. Using evaluability assessment to assess local community development health programmes: a Scottish case-study. *BMC Medical Research Methodology*. 2017;17(1):70.  
54  
55  
56  
57 67. Hartley JE, McAteer J, Doi L, et al. CARE: The development of an intervention for kinship carers with teenage children. *Qualitative Social Work*. 2018:1473325018783823.  
58  
59  
60

1  
2  
3 68. Soysal P, Veronese N, Thompson T, et al. Relationship between depression and frailty in  
4 older adults: A systematic review and meta-analysis. Ageing Res Rev. 2017;36:78-87.  
5  
6  
7  
8  
9  
10  
11  
12  
13  
14  
15  
16  
17  
18  
19  
20  
21  
22  
23  
24  
25  
26  
27  
28  
29  
30  
31  
32  
33  
34  
35  
36  
37  
38  
39  
40  
41  
42  
43  
44  
45  
46  
47  
48  
49  
50  
51  
52  
53  
54  
55  
56  
57  
58  
59  
60

For peer review only

Figure 1: Flow diagram

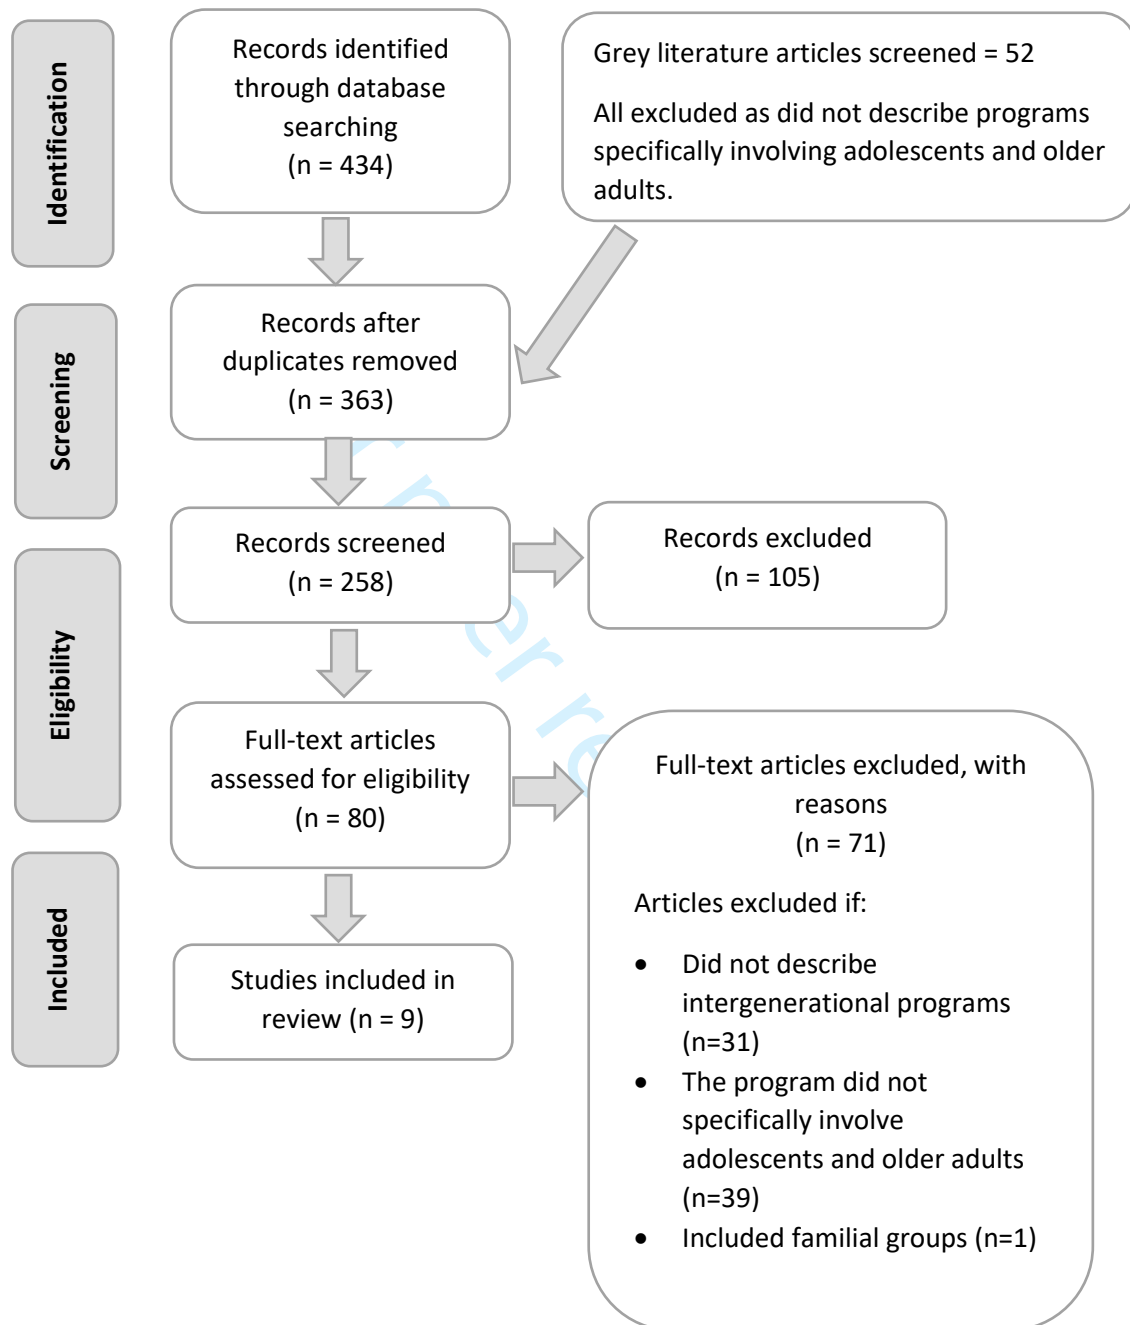

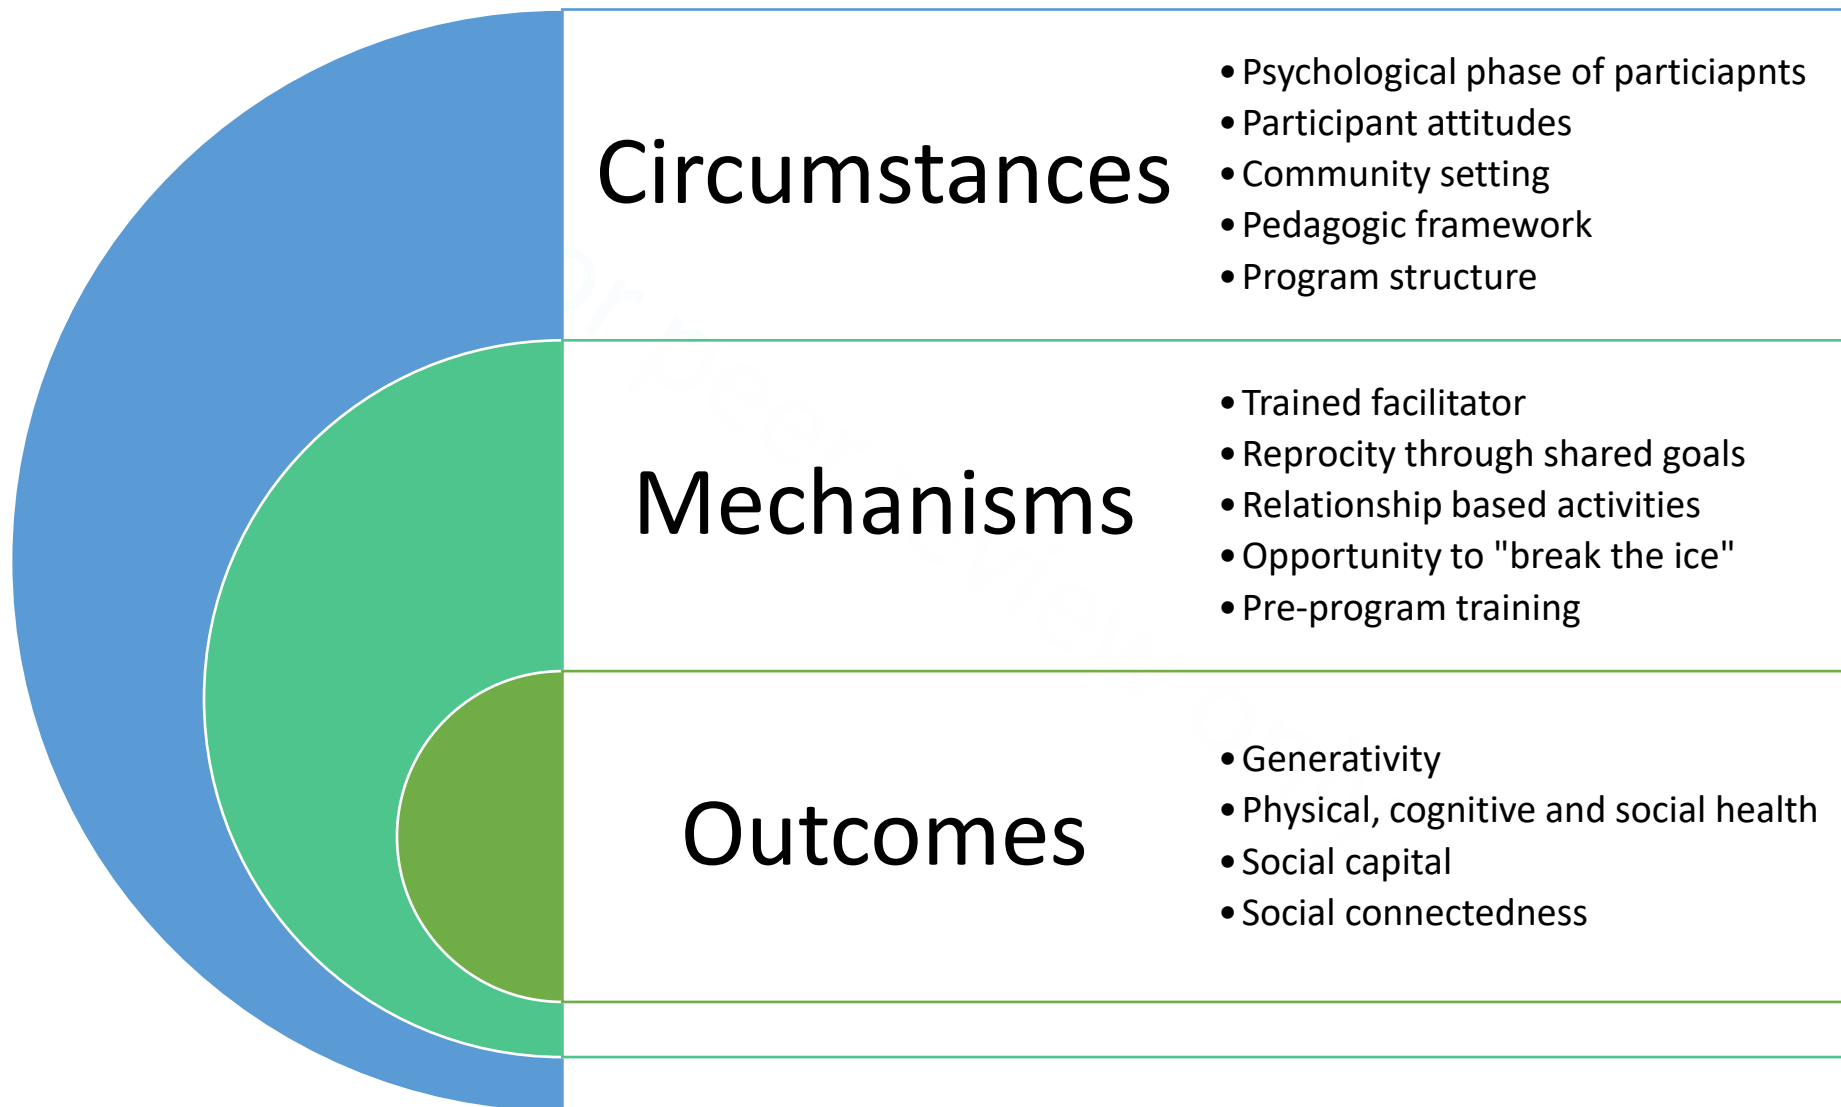

1  
2  
3  
4  
5  
6  
7  
8  
9  
10  
11  
12  
13  
14  
15  
16  
17  
18  
19  
20  
21  
22  
23  
24  
25  
26  
27  
28  
29  
30  
31  
32  
33  
34  
35  
36  
37  
38  
39  
40  
41  
42  
43  
44  
45  
46

For peer review only

## RAMESES checklist for reporting a realist synthesis

From Wong et al.: RAMESES publication standards: realist syntheses. BMC Medicine 2013 11:21. doi: 10.1186/1741-7015-11-21

<https://bmcmmedicine.biomedcentral.com/articles/10.1186/1741-7015-11-21>

| TITLE        |                                       |                                                                                                                                                                                                                                                                                                                                                                                                                       | Reported in document<br>Y/N/Unclear | Page number |
|--------------|---------------------------------------|-----------------------------------------------------------------------------------------------------------------------------------------------------------------------------------------------------------------------------------------------------------------------------------------------------------------------------------------------------------------------------------------------------------------------|-------------------------------------|-------------|
|              |                                       | In the title, identify the document as a realist synthesis or review                                                                                                                                                                                                                                                                                                                                                  | Y                                   | 1           |
| ABSTRACT     |                                       |                                                                                                                                                                                                                                                                                                                                                                                                                       |                                     |             |
|              |                                       | While acknowledging publication requirements and house style, abstracts should ideally contain brief details of: the study's background, review question or objectives; search strategy; methods of selection, appraisal, analysis and synthesis of sources; main results; and implications for practice.                                                                                                             | Y                                   | 2           |
| INTRODUCTION |                                       |                                                                                                                                                                                                                                                                                                                                                                                                                       |                                     |             |
|              | Rationale for review                  | Explain why the review is needed and what it is likely to contribute to existing understanding of the topic area.                                                                                                                                                                                                                                                                                                     | Y                                   | 6           |
|              | Objectives and focus of review        | State the objective(s) of the review and/or the review question(s). Define and provide a rationale for the focus of the review.                                                                                                                                                                                                                                                                                       | Y                                   | 6           |
|              | Ethical approval                      | State whether the project required and obtained ethical approval from the relevant authorities, with details.                                                                                                                                                                                                                                                                                                         | Y                                   | 10          |
| METHODS      |                                       |                                                                                                                                                                                                                                                                                                                                                                                                                       |                                     |             |
|              | Changes in the review process         | Any changes made to the review process that was initially planned should be briefly described and justified.                                                                                                                                                                                                                                                                                                          | N (no changes made)                 | n/a         |
|              | Rationale for using realist synthesis | Explain why realist synthesis was considered the most appropriate method to use.                                                                                                                                                                                                                                                                                                                                      | Y                                   | 6 to 7      |
|              | Scoping the literature                | Describe and justify the initial process of exploratory scoping of the literature.                                                                                                                                                                                                                                                                                                                                    | Y                                   | 7           |
|              | Searching processes                   | While considering specific requirements of the journal or other publication outlet, state and provide a rationale for how the iterative searching was done. Provide details on all the sources accessed for information in the review. Where searching in electronic databases has taken place, the details should include, for example, name of database, search terms, dates of coverage and date last searched. If | Y                                   | 9           |



|                   |                                                       |                                                                                                                                                                                                                                                                                                                                                                                         |   |               |
|-------------------|-------------------------------------------------------|-----------------------------------------------------------------------------------------------------------------------------------------------------------------------------------------------------------------------------------------------------------------------------------------------------------------------------------------------------------------------------------------|---|---------------|
|                   |                                                       | individuals familiar with the relevant literature and/or topic area were contacted, indicate how they were identified and selected.                                                                                                                                                                                                                                                     |   |               |
| 9                 | Selection and appraisal of documents                  | Explain how judgements were made about including and excluding data from documents, and justify these.                                                                                                                                                                                                                                                                                  | Y | 8 to 9        |
| 10                | Data extraction                                       | Describe and explain which data or information were extracted from the included documents and justify this selection.                                                                                                                                                                                                                                                                   | Y | 6             |
| 11                | Analysis and synthesis processes                      | Describe the analysis and synthesis processes in detail. This section should include information on the constructs analyzed and describe the analytic process.                                                                                                                                                                                                                          | Y | 10            |
| <b>RESULTS</b>    |                                                       |                                                                                                                                                                                                                                                                                                                                                                                         |   |               |
| 12                | Document flow diagram                                 | Provide details on the number of documents assessed for eligibility and included in the review with reasons for exclusion at each stage as well as an indication of their source of origin (for example, from searching databases, reference lists and so on). You may consider using the example templates (which are likely to need modification to suit the data) that are provided. | Y | Figure 1      |
| 13                | Document characteristics                              | Provide information on the characteristics of the documents included in the review.                                                                                                                                                                                                                                                                                                     | Y | Table 2       |
| 14                | Main findings                                         | Present the key findings with a specific focus on theory building and testing.                                                                                                                                                                                                                                                                                                          | Y | Page 15 to 24 |
| <b>DISCUSSION</b> |                                                       |                                                                                                                                                                                                                                                                                                                                                                                         |   |               |
| 15                | Summary of findings                                   | Summarize the main findings, taking into account the review's objective(s), research question(s), focus and intended audience(s).                                                                                                                                                                                                                                                       | Y | 25            |
| 16                | Strengths, limitations and future research directions | Discuss both the strengths of the review and its limitations. These should include (but need not be restricted to) (a) consideration of all the steps in the review process and (b) comment on the overall strength of evidence supporting the explanatory insights which emerged. The limitations identified may point to areas where further work is needed.                          | Y | 26-28         |
| 17                | Comparison with existing literature                   | Where applicable, compare and contrast the review's findings with the existing literature (for example, other reviews) on the same topic.                                                                                                                                                                                                                                               | Y | 25 to 26      |
| 18                | Conclusion and recommendations                        | List the main implications of the findings and place these in the context of other relevant literature. If appropriate, offer recommendations for policy and practice.                                                                                                                                                                                                                  | Y | 27            |
| 19                | Funding                                               | Provide details of funding source (if any) for the review, the role played by the funder (if any) and any conflicts of interests of the reviewers.                                                                                                                                                                                                                                      | Y | 29            |

## Supplementary file 2: Realist Review Protocol

**Title:** Circumstances that promote social connectedness in older adults participating in intergenerational programs with adolescents: a realist review

### Introduction

Intergenerational programs are programs that involve two unrelated generational groups and result in a mutually beneficial outcome for the participants. Erikson's theory of psychosocial development highlights that adolescents (for the purpose of this review aged 13-19) and older adults (for the purpose of this review 65 and older) are at comparable stages, facing questions around identity and integrity and dealing with life transitions of puberty and retirements respectively.

Social connectedness is highlighted as a major factor in wellbeing and health, particularly for older adults. The perceived or real lack of opportunities to be connected socially and with society can have negative impacts on a person's physical, social and mental health.

For the purpose of this review, the impact of intergenerational programs, that involve both adolescents and older adults, on social connectedness outcomes in the older adult group will be explored. The contexts and mechanism by which the program was delivered will also be explored as key parts of the interventions with the result of the review aiming to determine what contexts and mechanisms lead to the most beneficial outcomes for social connectedness. The objective of this realist review is to develop a program theory that guides the development of intergenerational programs involving adolescents and older adults, that impact upon social connectedness in older adults. There is a current gap in the literature addressing programs that involve specifically adolescents and their impact on the domain of social connectedness.

### Review Question

The SPIDER framework was used to develop the review question, which is based on describing the Sample (S), Phenomenon of Interest (PI), Design (D), Evaluation (E), and Research type (R) (Cook et al. 2012).

*Sample:* Adults aged 65 and over and adolescents aged 13-19 that are unrelated and engaged in engaged in intergenerational programs

1  
2 *Phenomenon of interest:* Any type of Intergenerational programs that involve two non-familial  
3 generational groups - adults aged 65 and over and adolescents aged 13-19. Inclusive of  
4 intergenerational programs that take place in community settings, including educational and  
5 aged care settings.  
6  
7

8  
9  
10 *Design:* Realist review  
11

12  
13 *Evaluation:* We will focus on characteristics, views and experiences from qualitative literature.  
14 From quantitative literature we will focus on the assessment of outcomes such as social  
15 connectedness, social isolation, social loneliness, social support, social participation and social  
16 interaction.  
17  
18  
19

20  
21  
22 *Research type:* Quantitative studies, qualitative studies, mixed methods.  
23

24  
25 Final review question: *Which circumstances promote social connectedness in older adults*  
26 *participating in intergenerational programs with adolescent?*  
27  
28

29  
30 **Plan for generation of *a priori* theories:**  
31

32 *A priori* theories will be developed utilising an iterative, two-part process. This will include an initial  
33 scoping search of Medline using the search terms outlined in the *Search Strategy* section below.  
34 We will also undertake initial engagement with relevant stakeholder to develop the *a priori*  
35 theories. The idea for this review came from a collaboration involving the authors, a municipality  
36 in regional Victoria, Australia, and a high school located within that municipality. Originally, the  
37 collaboration was centred on the development and evaluation of a pilot intergenerational digital  
38 literacy program involving adolescent school pupils and older community-dwelling individuals.  
39 However, during the initial stages of designing the program, the authors identified there was an  
40 absence of review-level evidence regarding intergenerational programs involving adolescents and  
41 older people. A decision was made to undertake a realist review on this topic. Municipal and high  
42 school collaborator stakeholders, namely senior teachers, municipal project officers and positive  
43 ageing ambassadors, will be involved in the process of generating *a priori* theories by contributing  
44 information on the need and opportunity for intergenerational programs in the school  
45 environment.  
46  
47  
48  
49  
50  
51  
52  
53  
54  
55  
56  
57  
58  
59  
60

## Search Strategy

The following electronic databases will be searched using English language limitation: MEDLINE, PsychINFO, CINAHL. Google Scholar will be used to supplement the search using a simplified search terms list from below.

Search terms included; (Aged OR "older adult" OR senior OR elder\* OR geriatric OR "old\* person\*") AND ("intergenerational relation\*" OR "intergenerational program\*" OR "intergenerational activit\*" OR "intergenerational practice" OR "intergenerational learning" OR "intergenerational service learning" OR "intergenerational relations" OR intergenerational) AND ("social connect\*" OR "social isolation" OR "social interact\*" OR loneliness OR "social participation") AND ("adolescent")

## Inclusion and Exclusion Criteria

Qualitative, Quantitative and Mixed method studies will be eligible for inclusion

| Included                                     | Excluded                                                                                               |
|----------------------------------------------|--------------------------------------------------------------------------------------------------------|
| Study reported on intergenerational programs | Reported on non-intergenerational programs                                                             |
| Participants from non-familial generations   | Studies involving the study of grandparents / grandparenting or family intergenerational relationships |
| Aged 13-19                                   | Aged <13                                                                                               |
| Aged 65 and above                            | Aged 20-64                                                                                             |
| Published 2000-2020                          | Published before 2000                                                                                  |
| Published in English                         | Not published in English                                                                               |

Where studies include part of the age range and are determined to contribute to the development of the program theory, they will be included. Two reviewers will determine such studies inclusion.

## Study Selection

Two reviewers will determine included studies. Inclusion criteria as above will be applied to the studies retrieved from the search.

## Data extraction and Quality Assessment

Data will be extracted using a bespoke data extraction form. A bespoke quality assessment tool will be developed. Both data extraction and quality assessment will be undertaken by two reviewers.

1  
2  
3  
4  
5  
6  
7  
8  
9  
10  
11  
12  
13  
14  
15  
16  
17  
18  
19  
20  
21  
22  
23  
24  
25  
26  
27  
28  
29  
30  
31  
32  
33  
34  
35  
36  
37  
38  
39  
40  
41  
42  
43  
44  
45  
46  
47  
48  
49  
50  
51  
52  
53  
54  
55  
56  
57  
58  
59  
60

**Data synthesis**

The aim of the synthesis is to identify potential context-mechanism-outcome configurations (CMOCs) to develop a programme theory about the circumstances that can promote social connectedness in older adults participating in intergenerational programs with adolescent.

For peer review only

**REFERENCES**

Cooke A, Smith D and Booth A (2012) Beyond PICO: The SPIDER Tool for Qualitative Evidence Synthesis. *Qualitative Health Research* 22(10) 1435-1443

For peer review only

| Number                             | combined                    | Search term - Medline                   | MeSH | Keyword | total      |     |
|------------------------------------|-----------------------------|-----------------------------------------|------|---------|------------|-----|
| 3 or 7                             | 2963804                     | (MH "Aged") OR (MH "Aged, 80 and Over") | yes  |         | 3076650    |     |
|                                    | <b>OR</b>                   |                                         |      |         |            |     |
|                                    | 355786                      | "older adult" OR                        |      |         |            | yes |
|                                    |                             | senior OR                               |      |         |            | yes |
|                                    |                             | elder* OR                               |      |         |            | yes |
|                                    |                             | geriatric OR                            |      |         |            | yes |
| "old* person*" OR                  |                             |                                         |      | yes     |            |     |
| <b>AND</b>                         |                             |                                         |      |         |            |     |
| 1 or 2 or 4                        | 6242                        | "intergenerational relation*" OR        |      |         | yes        |     |
|                                    |                             | "intergenerational program*" OR         |      |         | yes        |     |
|                                    |                             | "intergenerational activit*" OR         |      |         | yes        |     |
|                                    |                             | "intergenerational practice" OR         |      |         | yes        |     |
|                                    |                             | "intergenerational learning"            |      |         | yes        |     |
|                                    | <b>OR</b>                   |                                         |      |         |            |     |
| 3734                               | intergenerational relations |                                         | yes  |         |            |     |
| <b>OR</b>                          |                             |                                         |      |         |            |     |
| 6242                               | intergenerational           |                                         |      | yes     |            |     |
| <b>AND</b>                         |                             |                                         |      |         |            |     |
| 5                                  | 44986                       | "social connect*" OR                    |      |         | yes        |     |
|                                    |                             | "social isolation" OR                   |      |         | yes        |     |
|                                    |                             | "social interact*" OR                   |      |         | yes        |     |
|                                    |                             | loneliness OR                           |      |         | yes        |     |
|                                    |                             | "social participation"                  |      |         | yes        |     |
| <b>5 and 6 and 8</b>               | <b>TOTAL</b>                |                                         |      |         | <b>105</b> |     |
| <b>Limited to english language</b> |                             |                                         |      |         | <b>93</b>  |     |

| Number                | combined                                   | Search term -CINAHL                     | MeSH | Keyword | total      |  |
|-----------------------|--------------------------------------------|-----------------------------------------|------|---------|------------|--|
| S1 OR S5              | 720418                                     | (MH "Aged") OR (MH "Aged, 80 and Over") | yes  |         | 772260     |  |
|                       | <b>OR</b>                                  |                                         |      |         |            |  |
|                       | 162145                                     | "older adult" OR                        |      | yes     |            |  |
|                       |                                            | senior OR                               |      | yes     |            |  |
|                       |                                            | elder* OR                               |      | yes     |            |  |
|                       |                                            | geriatric OR                            |      | yes     |            |  |
| "old* person*" OR     |                                            |                                         | yes  |         |            |  |
| <b>AND</b>            |                                            |                                         |      |         |            |  |
| S2 OR S3              | 6242                                       | "intergenerational relation*" OR        |      | yes     | 6242       |  |
|                       |                                            | "intergenerational program*" OR         |      | yes     |            |  |
|                       |                                            | "intergenerational activit*" OR         |      | yes     |            |  |
|                       |                                            | "intergenerational practice" OR         |      | yes     |            |  |
|                       |                                            | "intergenerational learning"            |      | yes     |            |  |
|                       | <b>OR</b>                                  |                                         |      |         |            |  |
| 6242                  | intergenerational                          |                                         | yes  |         |            |  |
| <b>AND</b>            |                                            |                                         |      |         |            |  |
| S6                    | 22543                                      | "social connect*" OR                    |      | yes     | 22543      |  |
|                       |                                            | "social isolation" OR                   |      | yes     |            |  |
|                       |                                            | "social interact*" OR                   |      | yes     |            |  |
|                       |                                            | loneliness OR                           |      | yes     |            |  |
|                       |                                            | "social participation"                  |      | yes     |            |  |
| <b>TOTAL</b>          |                                            |                                         |      |         | <b>143</b> |  |
| S6 AND S12<br>AND S14 | <b>Limited to age and english language</b> |                                         |      |         | <b>139</b> |  |



| Number               | combined                           | Search term -PsycINFO                   | MeSH | Keyword | total      |  |
|----------------------|------------------------------------|-----------------------------------------|------|---------|------------|--|
| 1 or 6               |                                    | (MH "Aged") OR (MH "Aged, 80 and Over") |      | yes     |            |  |
|                      | <b>OR</b>                          |                                         |      |         |            |  |
|                      |                                    | "older adult" OR                        |      | yes     |            |  |
|                      |                                    | senior OR                               |      | yes     |            |  |
|                      |                                    | elder* OR                               |      | yes     |            |  |
|                      |                                    | geriatric OR                            |      | yes     |            |  |
|                      |                                    | "old* person*"                          |      | yes     |            |  |
| 2 or 3 or 4          | <b>AND</b>                         |                                         |      |         |            |  |
|                      |                                    | "intergenerational relation*" OR        |      | yes     |            |  |
|                      |                                    | "intergenerational program*" OR         |      | yes     |            |  |
|                      |                                    | "intergenerational activit*" OR         |      | yes     |            |  |
|                      |                                    | "intergenerational practice" OR         |      | yes     |            |  |
|                      |                                    | "intergenerational learning"            |      | yes     |            |  |
|                      | <b>OR</b>                          |                                         |      |         |            |  |
|                      |                                    | intergenerational relations             | yes  |         |            |  |
| <b>OR</b>            |                                    |                                         |      |         |            |  |
|                      | intergenerational                  |                                         | yes  |         |            |  |
| 5                    | <b>AND</b>                         |                                         |      |         |            |  |
|                      |                                    | "social connect*" OR                    |      | yes     |            |  |
|                      |                                    | "social isolation" OR                   |      | yes     |            |  |
|                      |                                    | "social interact*" OR                   |      | yes     |            |  |
|                      |                                    | loneliness OR                           |      | yes     |            |  |
|                      | "social participation"             |                                         | yes  |         |            |  |
| <b>5 and 6 and 7</b> | <b>TOTAL</b>                       |                                         |      |         | <b>144</b> |  |
|                      | <b>Limited to english language</b> |                                         |      |         | <b>133</b> |  |

|                                                                                                                 |           |
|-----------------------------------------------------------------------------------------------------------------|-----------|
| <b>Google Scholar</b>                                                                                           |           |
| older people or aged or senior AND "intergenerational program*" or intergenerational AND "social connectedness" | <b>73</b> |

|                   |                                                                                                                                                                    |
|-------------------|--------------------------------------------------------------------------------------------------------------------------------------------------------------------|
| <b>Search two</b> | Added "adolescent" <a href="#">search term</a> to each <a href="#">of the above search strategies</a> in order to refine search by age limit of agreed 13-19 years |
|-------------------|--------------------------------------------------------------------------------------------------------------------------------------------------------------------|

For peer review only

## Supplementary File 4: Inclusion and Exclusion Criteria

| Included                                                                                               | Excluded                                                                                               |
|--------------------------------------------------------------------------------------------------------|--------------------------------------------------------------------------------------------------------|
| Study reporting on intergenerational programs. Study can be quantitative, qualitative or mixed-methods | Reported on non-intergenerational programs                                                             |
| Participants from non-familial generations                                                             | Studies involving the study of grandparents / grandparenting or family intergenerational relationships |
| Aged 13-19                                                                                             | Aged <13                                                                                               |
| Aged 65 and above                                                                                      | Aged 20-64                                                                                             |
| Published 2000-2020                                                                                    | Published before 2000                                                                                  |
| Published in English                                                                                   | Not published in English                                                                               |

1  
2  
3  
4  
5  
6  
7  
8  
9  
10  
11  
12  
13  
14  
15  
16  
17  
18  
19  
20  
21  
22  
23  
24  
25  
26  
27  
28  
29  
30  
31  
32  
33  
34  
35  
36  
37  
38  
39  
40  
41  
42  
43  
44  
45  
46  
47  
48  
49  
50  
51  
52  
53  
54  
55  
56  
57  
58  
59  
60

**SUPPLEMENTARY FILE 5: DATA EXTRACTION FORM**

| <b>1. Bibliographic details</b>                                                           |  |
|-------------------------------------------------------------------------------------------|--|
| Article number:                                                                           |  |
| Article reference:                                                                        |  |
| Extracted by:                                                                             |  |
| Checked by:                                                                               |  |
| Researcher details (discipline or professional background)                                |  |
| What are the geographic details of the study?                                             |  |
| <b>2. Aims and Methods</b>                                                                |  |
| What is the study type?                                                                   |  |
| What methods were used?                                                                   |  |
| Are the aims/ objectives clearly stated in the study? Detail                              |  |
| Is the research question/s stated explicitly or within the text? Detail                   |  |
| What materials were used to collect the data?                                             |  |
| How was the data analysed?                                                                |  |
| Does the intervention use a particular theory to inform its design?                       |  |
| <b>3. Participants</b>                                                                    |  |
| What was the sample size?                                                                 |  |
| What were the sample characteristics?                                                     |  |
| How were participants recruited?                                                          |  |
| What were the inclusion and exclusion criteria?                                           |  |
| <b>4. Intervention details</b>                                                            |  |
| What was the intervention?                                                                |  |
| How was the intervention delivered?                                                       |  |
| Who is delivering the intervention?                                                       |  |
| In what setting was the intervention delivered?<br>Why was this setting / context chosen? |  |
| Was this setting appropriate to examine the research question?                            |  |
| Was the intervention designed with the participants (one or both age groups)?             |  |
| How were adolescents involved in the intervention?                                        |  |

|    |                                                                                                                                                                                                                                  |  |
|----|----------------------------------------------------------------------------------------------------------------------------------------------------------------------------------------------------------------------------------|--|
| 1  | How were older people involved in the intervention?                                                                                                                                                                              |  |
| 2  |                                                                                                                                                                                                                                  |  |
| 3  |                                                                                                                                                                                                                                  |  |
| 4  |                                                                                                                                                                                                                                  |  |
| 5  | <b>5. Findings/ Results</b>                                                                                                                                                                                                      |  |
| 6  | What was the reported experiences of the participants?                                                                                                                                                                           |  |
| 7  |                                                                                                                                                                                                                                  |  |
| 8  | What was the reported experience of the facilitators?                                                                                                                                                                            |  |
| 9  |                                                                                                                                                                                                                                  |  |
| 10 | Did the intervention focus on/ impact on social connectedness?                                                                                                                                                                   |  |
| 11 |                                                                                                                                                                                                                                  |  |
| 12 | Did the adolescents report (or was it reported by others) greater understanding of older people?                                                                                                                                 |  |
| 13 |                                                                                                                                                                                                                                  |  |
| 14 |                                                                                                                                                                                                                                  |  |
| 15 | Did the older people report (or was it reported by others) impact upon social connectedness?                                                                                                                                     |  |
| 16 |                                                                                                                                                                                                                                  |  |
| 17 |                                                                                                                                                                                                                                  |  |
| 18 | Did the older people report (or was it reported by others) impact upon overall health and wellbeing?                                                                                                                             |  |
| 19 |                                                                                                                                                                                                                                  |  |
| 20 |                                                                                                                                                                                                                                  |  |
| 21 | Did the older people report (or was it reported by others) greater understanding of the younger generation?                                                                                                                      |  |
| 22 |                                                                                                                                                                                                                                  |  |
| 23 |                                                                                                                                                                                                                                  |  |
| 24 | Did the age range of the participants impact upon the success of the intervention? Were there structural barriers here e.g. transport, health issues?                                                                            |  |
| 25 |                                                                                                                                                                                                                                  |  |
| 26 |                                                                                                                                                                                                                                  |  |
| 27 |                                                                                                                                                                                                                                  |  |
| 28 |                                                                                                                                                                                                                                  |  |
| 29 | What themes (qualitative) / headline findings (quantitative) were generated by the study? (around intergenerational programs, adolescents, older people, context in which delivered/ undertaken)                                 |  |
| 30 |                                                                                                                                                                                                                                  |  |
| 31 |                                                                                                                                                                                                                                  |  |
| 32 |                                                                                                                                                                                                                                  |  |
| 33 | Are the findings interpreted within the contexts of other studies and theory?                                                                                                                                                    |  |
| 34 |                                                                                                                                                                                                                                  |  |
| 35 | <b>6. Were the <i>a priori</i> theories supported/ confirmed?</b>                                                                                                                                                                |  |
| 36 | That intergenerational programs involving adolescents and older adults improve social connectedness in the older adult group                                                                                                     |  |
| 37 |                                                                                                                                                                                                                                  |  |
| 38 | That intergenerational programs conducted in educational contexts result in positive outcomes in social connectedness for one/both groups                                                                                        |  |
| 39 |                                                                                                                                                                                                                                  |  |
| 40 | Adolescents and older people are at a similar psychological milestone and therefore are mutual beneficiaries of intergenerational programs                                                                                       |  |
| 41 |                                                                                                                                                                                                                                  |  |
| 42 | Older people may be socially disconnected in the absence of loneliness- intergenerational programs help support meaningful connections within the community, with individuals outside of their normal age and social demographic |  |
| 43 |                                                                                                                                                                                                                                  |  |
| 44 | Greater generativity is formed through participation in intergenerational programs                                                                                                                                               |  |
| 45 |                                                                                                                                                                                                                                  |  |
| 46 | Intergenerational programs conducted in educational contexts build community connections between generations and across structural community assets like schools.                                                                |  |
| 47 |                                                                                                                                                                                                                                  |  |
| 48 | What new theories were generated by this study?                                                                                                                                                                                  |  |
| 49 |                                                                                                                                                                                                                                  |  |
| 50 |                                                                                                                                                                                                                                  |  |
| 51 |                                                                                                                                                                                                                                  |  |
| 52 |                                                                                                                                                                                                                                  |  |
| 53 |                                                                                                                                                                                                                                  |  |
| 54 |                                                                                                                                                                                                                                  |  |
| 55 |                                                                                                                                                                                                                                  |  |
| 56 |                                                                                                                                                                                                                                  |  |
| 57 |                                                                                                                                                                                                                                  |  |
| 58 |                                                                                                                                                                                                                                  |  |
| 59 |                                                                                                                                                                                                                                  |  |
| 60 |                                                                                                                                                                                                                                  |  |

**SUPPLEMENTARY FILE 6: QUALITY ASSESSMENT**

| <b>Quality Assessment Criteria</b> |                                                                                                                                                                                          |
|------------------------------------|------------------------------------------------------------------------------------------------------------------------------------------------------------------------------------------|
| <b>1</b>                           | Is there adequate rationale for using this design to address the research aim/ question?                                                                                                 |
| <b>2</b>                           | Did the authors justify the sample size used?                                                                                                                                            |
| <b>3</b>                           | Is adequate evidence provided to support the findings?                                                                                                                                   |
| <b>4</b>                           | Quantitative Studies: When comparing / analysing the groups (if more than one), did the authors consider the<br>- Comparability<br>- Confounding variables<br>and controlling for these? |
| <b>5</b>                           | Qualitative Studies: Did the researchers consider their own position, assumptions and possible biases?                                                                                   |
| <b>6</b>                           | Were the strengths and limitations stated?                                                                                                                                               |
| <b>7</b>                           | Was ethical committee approval obtained?                                                                                                                                                 |
| <b>8</b>                           | How valuable is this research to the review? High, Medium or Low                                                                                                                         |

\*Items 1,2,3,5,7,8 from CASP qualitative checklist (CASP 2018a). Items 5, 1 and 7 also from Long (2005). Item 4 from CASP Cohort Study Checklist (CASP 2018b)

**REFERENCES**

Long A (2005). Evaluative tool for mixed method studies. University of Leeds, School of Healthcare[online]. 24:2017.

Critical Appraisal Skills Programme (2018). CASP (Qualitative) Checklist. [online] Available at: [https://casp-uk.net/images/checklist/documents/CASP-Qualitative-Studies-Checklist/CASP-Qualitative-Checklist-2018\\_fillable\\_form.pdf](https://casp-uk.net/images/checklist/documents/CASP-Qualitative-Studies-Checklist/CASP-Qualitative-Checklist-2018_fillable_form.pdf). Date Accessed: 17/2/20

Critical Appraisal Skills Programme (2018). CASP (Cohort Study) Checklist. [online] Available at: [https://casp-uk.net/images/checklist/documents/CASP-Cohort-Study-Checklist/CASP-Cohort-Study-Checklist-2018\\_fillable\\_form.pdf](https://casp-uk.net/images/checklist/documents/CASP-Cohort-Study-Checklist/CASP-Cohort-Study-Checklist-2018_fillable_form.pdf). Accessed: Date Accessed: 17/2/20

| Quality Assessment Criteria |                                                                                                                                                                                       | de Souza[45] | Kessler and Staudinger[37] | Hernandez and Gonzalez[46] | Wilson, Cordier[47] | Biggs and Knox[48] | Knight, Skouteris[35] | Ostensen, Gjevjon[15] | Santini, Tombolesi[49] | Wilson, Cordier[33] |
|-----------------------------|---------------------------------------------------------------------------------------------------------------------------------------------------------------------------------------|--------------|----------------------------|----------------------------|---------------------|--------------------|-----------------------|-----------------------|------------------------|---------------------|
| 1                           | Is there adequate rationale for using this design to address the research aim/question?                                                                                               | ✓            | ✓                          | ✓                          | ✓                   | ✓                  | ✓                     | ✓                     | ✓                      | ✓                   |
| 2                           | Did the authors justify the sample size used?                                                                                                                                         | UNCLEAR      | ✓                          | ✓                          | ✓                   | ✓                  | ✓                     | ✓                     | ✓                      | ✓                   |
| 3                           | Is adequate evidence provided to support the findings?                                                                                                                                | ✓            | ✓                          | ✓                          | ✓                   | UNCLEAR            | ✓                     | ✓                     | ✓                      | ✓                   |
| 4                           | Quantitative Studies: When comparing / analysing the groups (if more than one), did the authors consider the<br>- Comparability<br>- Confounding variables and controlling for these? | N/A          | ✓                          | ✓                          | N/A                 | ✓                  | N/A                   | N/A                   | N/A                    | ✓                   |
| 5                           | Qualitative Studies: Did the researchers consider their own position, assumptions and possible biases?                                                                                | UNCLEAR      | N/A                        | N/A                        | ✓                   | N/A                | ✓                     | UNCLEAR               | ✓                      | UNCLEAR             |
| 6                           | Were the strengths and limitations stated?                                                                                                                                            | ✓            | ✓                          | ✓                          | ✓                   | ✓                  | ✓                     | ✓                     | ✓                      | ✓                   |
| 7                           | Was ethical committee approval obtained?                                                                                                                                              | UNCLEAR      | UNCLEAR                    | ✓                          | ✓                   | ✓                  | ✓                     | ✓                     | UNCLEAR                | ✓                   |
| 8                           | How valuable is this research to the review? High, Medium or Low                                                                                                                      | HIGH         | HIGH                       | MEDIUM                     | HIGH                | MEDIUM             | HIGH                  | HIGH                  | HIGH                   | HIGH                |
