# Supplementary material for: Circumstances that promote social connectedness in older adults participating in intergenerational programmes with adolescents: a realist review
Source: PubMed Central journal article supplement — BMJ Open. 2023 Oct 17;13(10):e069765. doi: 10.1136/bmjopen-2022-069765 (PMC10583064; doi:10.1136/bmjopen-2022-069765), 2023-10-17
Supplement: bmjopen-2022-069765supp003.pdf [file bmjopen-2022-069765supp003.pdf]

| Number                             | combined          | Search term - Medline                   | MeSH | Keyword    | total   |  |
|------------------------------------|-------------------|-----------------------------------------|------|------------|---------|--|
| 3 or 7                             | 2963804           | (MH "Aged") OR (MH "Aged, 80 and Over") | yes  |            | 3076650 |  |
|                                    | <b>OR</b>         |                                         |      |            |         |  |
|                                    | 355786            | "older adult" OR                        |      | yes        |         |  |
|                                    |                   | senior OR                               |      | yes        |         |  |
|                                    |                   | elder* OR                               |      | yes        |         |  |
|                                    |                   | geriatric OR                            |      | yes        |         |  |
| "old* person*" OR                  |                   | yes                                     |      |            |         |  |
| 1 or 2 or 4                        | <b>AND</b>        |                                         |      |            |         |  |
|                                    | 6242              | "intergenerational relation*" OR        |      | yes        | 7854    |  |
|                                    |                   | "intergenerational program*" OR         |      | yes        |         |  |
|                                    |                   | "intergenerational activit*" OR         |      | yes        |         |  |
|                                    |                   | "intergenerational practice" OR         |      | yes        |         |  |
|                                    |                   | "intergenerational learning"            |      | yes        |         |  |
|                                    | <b>OR</b>         |                                         |      |            |         |  |
|                                    | 3734              | intergenerational relations             | yes  |            |         |  |
|                                    | <b>OR</b>         |                                         |      |            |         |  |
| 6242                               | intergenerational |                                         | yes  |            |         |  |
| 5                                  | <b>AND</b>        |                                         |      |            |         |  |
|                                    | 44986             | "social connect*" OR                    |      | yes        | 44986   |  |
|                                    |                   | "social isolation" OR                   |      | yes        |         |  |
|                                    |                   | "social interact*" OR                   |      | yes        |         |  |
|                                    |                   | loneliness OR                           |      | yes        |         |  |
| "social participation"             |                   |                                         | yes  |            |         |  |
| <b>5 and 6 and 8</b>               | <b>TOTAL</b>      |                                         |      | <b>105</b> |         |  |
| <b>Limited to english language</b> |                   |                                         |      | <b>93</b>  |         |  |

| Number                | combined                                   | Search term -CINAHL                     | MeSH | Keyword | total      |  |
|-----------------------|--------------------------------------------|-----------------------------------------|------|---------|------------|--|
| S1 OR S5              | 720418                                     | (MH "Aged") OR (MH "Aged, 80 and Over") | yes  |         | 772260     |  |
|                       | <b>OR</b>                                  |                                         |      |         |            |  |
|                       | 162145                                     | "older adult" OR                        |      | yes     |            |  |
|                       |                                            | senior OR                               |      | yes     |            |  |
|                       |                                            | elder* OR                               |      | yes     |            |  |
|                       |                                            | geriatric OR                            |      | yes     |            |  |
|                       |                                            | "old* person*" OR                       |      | yes     |            |  |
| <b>AND</b>            |                                            |                                         |      |         |            |  |
| S2 OR S3              | 6242                                       | "intergenerational relation*" OR        |      | yes     | 6242       |  |
|                       |                                            | "intergenerational program*" OR         |      | yes     |            |  |
|                       |                                            | "intergenerational activit*" OR         |      | yes     |            |  |
|                       |                                            | "intergenerational practice" OR         |      | yes     |            |  |
|                       |                                            | "intergenerational learning"            |      | yes     |            |  |
|                       | <b>OR</b>                                  |                                         |      |         |            |  |
|                       | 6242                                       | intergenerational                       |      | yes     |            |  |
| <b>AND</b>            |                                            |                                         |      |         |            |  |
| S6                    | 22543                                      | "social connect*" OR                    |      | yes     | 22543      |  |
|                       |                                            | "social isolation" OR                   |      | yes     |            |  |
|                       |                                            | "social interact*" OR                   |      | yes     |            |  |
|                       |                                            | loneliness OR                           |      | yes     |            |  |
|                       |                                            | "social participation"                  |      | yes     |            |  |
| <b>TOTAL</b>          |                                            |                                         |      |         | <b>143</b> |  |
| S6 AND S12<br>AND S14 | <b>Limited to age and english language</b> |                                         |      |         | <b>139</b> |  |

| Number               | combined                           | Search term -PsycINFO                   | MeSH | Keyword | total      |  |
|----------------------|------------------------------------|-----------------------------------------|------|---------|------------|--|
| 1 or 6               |                                    | (MH "Aged") OR (MH "Aged, 80 and Over") |      | yes     |            |  |
|                      | OR                                 |                                         |      |         |            |  |
|                      |                                    | "older adult" OR                        |      | yes     |            |  |
|                      |                                    | senior OR                               |      | yes     |            |  |
|                      |                                    | elder* OR                               |      | yes     |            |  |
|                      |                                    | geriatric OR                            |      | yes     |            |  |
|                      | "old* person*"                     |                                         | yes  |         |            |  |
| 2 or 3 or 4          | AND                                |                                         |      |         |            |  |
|                      |                                    | "intergenerational relation*" OR        |      | yes     |            |  |
|                      |                                    | "intergenerational program*" OR         |      | yes     |            |  |
|                      |                                    | "intergenerational activit*" OR         |      | yes     |            |  |
|                      |                                    | "intergenerational practice" OR         |      | yes     |            |  |
|                      |                                    | "intergenerational learning"            |      | yes     |            |  |
|                      | OR                                 |                                         |      |         |            |  |
|                      |                                    | intergenerational relations             | yes  |         |            |  |
| OR                   |                                    |                                         |      |         |            |  |
|                      | intergenerational                  |                                         | yes  |         |            |  |
| 5                    | AND                                |                                         |      |         |            |  |
|                      |                                    | "social connect*" OR                    |      | yes     |            |  |
|                      |                                    | "social isolation" OR                   |      | yes     |            |  |
|                      |                                    | "social interact*" OR                   |      | yes     |            |  |
|                      |                                    | loneliness OR                           |      | yes     |            |  |
|                      | "social participation"             |                                         | yes  |         |            |  |
| <b>5 and 6 and 7</b> | <b>TOTAL</b>                       |                                         |      |         | <b>144</b> |  |
|                      | <b>Limited to english language</b> |                                         |      |         | <b>133</b> |  |

|                                                                                                                 |                                                                                                                                    |           |
|-----------------------------------------------------------------------------------------------------------------|------------------------------------------------------------------------------------------------------------------------------------|-----------|
| <b>Google Scholar</b>                                                                                           |                                                                                                                                    |           |
| older people or aged or senior AND "intergenerational program*" or intergenerational AND "social connectedness" |                                                                                                                                    | <b>73</b> |
| <b>Search two</b>                                                                                               | Added "adolescent" search term to each of the above search strategies in order to refine search by age limit of agreed 13-19 years |           |
