# Supplementary material for: Circumstances that promote social connectedness in older adults participating in intergenerational programmes with adolescents: a realist review
Source: PubMed Central journal article supplement — BMJ Open. 2023 Oct 17;13(10):e069765. doi: 10.1136/bmjopen-2022-069765 (PMC10583064; doi:10.1136/bmjopen-2022-069765), 2023-10-17
Supplement: bmjopen-2022-069765supp004.pdf [file bmjopen-2022-069765supp004.pdf]

**Supplementary File 4: Inclusion and Exclusion Criteria**

| <b>Included</b>                                                                                        | <b>Excluded</b>                                                                                        |
|--------------------------------------------------------------------------------------------------------|--------------------------------------------------------------------------------------------------------|
| Study reporting on intergenerational programs. Study can be quantitative, qualitative or mixed-methods | Reported on non-intergenerational programs                                                             |
| Participants from non-familial generations                                                             | Studies involving the study of grandparents / grandparenting or family intergenerational relationships |
| Aged 13-19                                                                                             | Aged <13                                                                                               |
| Aged 65 and above                                                                                      | Aged 20-64                                                                                             |
| Published 2000-2020                                                                                    | Published before 2000                                                                                  |
| Published in English                                                                                   | Not published in English                                                                               |
