# Supplementary material for: Circumstances that promote social connectedness in older adults participating in intergenerational programmes with adolescents: a realist review
Source: PubMed Central journal article supplement — BMJ Open. 2023 Oct 17;13(10):e069765. doi: 10.1136/bmjopen-2022-069765 (PMC10583064; doi:10.1136/bmjopen-2022-069765), 2023-10-17
Supplement: bmjopen-2022-069765supp005.pdf [file bmjopen-2022-069765supp005.pdf]

**SUPPLEMENTARY FILE 5: DATA EXTRACTION FORM**

| <b>1. Bibliographic details</b>                                                           |  |
|-------------------------------------------------------------------------------------------|--|
| Article number:                                                                           |  |
| Article reference:                                                                        |  |
| Extracted by:                                                                             |  |
| Checked by:                                                                               |  |
| Researcher details (discipline or professional background)                                |  |
| What are the geographic details of the study?                                             |  |
| <b>2. Aims and Methods</b>                                                                |  |
| What is the study type?                                                                   |  |
| What methods were used?                                                                   |  |
| Are the aims/ objectives clearly stated in the study? Detail                              |  |
| Is the research question/s stated explicitly or within the text? Detail                   |  |
| What materials were used to collect the data?                                             |  |
| How was the data analysed?                                                                |  |
| Does the intervention use a particular theory to inform its design?                       |  |
| <b>3. Participants</b>                                                                    |  |
| What was the sample size?                                                                 |  |
| What were the sample characteristics?                                                     |  |
| How were participants recruited?                                                          |  |
| What were the inclusion and exclusion criteria?                                           |  |
| <b>4. Intervention details</b>                                                            |  |
| What was the intervention?                                                                |  |
| How was the intervention delivered?                                                       |  |
| Who is delivering the intervention?                                                       |  |
| In what setting was the intervention delivered?<br>Why was this setting / context chosen? |  |
| Was this setting appropriate to examine the research question?                            |  |
| Was the intervention designed with the participants (one or both age groups)?             |  |
| How were adolescents involved in the intervention?                                        |  |

|                                                                                                                                                                                                                                 |  |
|---------------------------------------------------------------------------------------------------------------------------------------------------------------------------------------------------------------------------------|--|
| How were older people involved in the intervention?                                                                                                                                                                             |  |
| <b>5. Findings/ Results</b>                                                                                                                                                                                                     |  |
| What was the reported experiences of the participants?                                                                                                                                                                          |  |
| What was the reported experience of the facilitators?                                                                                                                                                                           |  |
| Did the intervention focus on/ impact on social connectedness?                                                                                                                                                                  |  |
| Did the adolescents report (or was it reported by others) greater understanding of older people?                                                                                                                                |  |
| Did the older people report (or was it reported by others) impact upon social connectedness?                                                                                                                                    |  |
| Did the older people report (or was it reported by others) impact upon overall health and wellbeing?                                                                                                                            |  |
| Did the older people report (or was it reported by others) greater understanding of the younger generation?                                                                                                                     |  |
| Did the age range of the participants impact upon the success of the intervention? Were there structural barriers here e.g. transport, health issues?                                                                           |  |
| What themes (qualitative) / headline findings (quantitative) were generated by the study? (around intergenerational programs, adolescents, older people, context in which delivered/ undertaken)                                |  |
| Are the findings interpreted within the contexts of other studies and theory?                                                                                                                                                   |  |
| <b>6. Were the <i>a priori</i> theories supported/ confirmed?</b>                                                                                                                                                               |  |
| That intergenerational programs involving adolescents and older adults improve social connectedness in the older adult group                                                                                                    |  |
| That intergenerational programs conducted in educational contexts result in positive outcomes in social connectedness for one/both groups                                                                                       |  |
| Adolescents and older people are at a similar psychological milestone and therefore are mutual beneficiaries of intergenerational programs                                                                                      |  |
| Older people may be socially disconnected in the absence of loneliness-intergenerational programs help support meaningful connections within the community, with individuals outside of their normal age and social demographic |  |
| Greater generativity is formed through participation in intergenerational programs                                                                                                                                              |  |
| Intergenerational programs conducted in educational contexts build community connections between generations and across structural community assets like schools.                                                               |  |
| What new theories were generated by this study?                                                                                                                                                                                 |  |
