# Supplementary material for: Circumstances that promote social connectedness in older adults participating in intergenerational programmes with adolescents: a realist review
Source: PubMed Central journal article supplement — BMJ Open. 2023 Oct 17;13(10):e069765. doi: 10.1136/bmjopen-2022-069765 (PMC10583064; doi:10.1136/bmjopen-2022-069765), 2023-10-17
Supplement: bmjopen-2022-069765supp006.pdf [file bmjopen-2022-069765supp006.pdf]

**SUPPLEMENTARY FILE 6: QUALITY ASSESSMENT**

| Quality Assessment Criteria |                                                                                                                                                                                                                                            |
|-----------------------------|--------------------------------------------------------------------------------------------------------------------------------------------------------------------------------------------------------------------------------------------|
| <b>1</b>                    | Is there adequate rationale for using this design to address the research aim/ question?                                                                                                                                                   |
| <b>2</b>                    | Did the authors justify the sample size used?                                                                                                                                                                                              |
| <b>3</b>                    | Is adequate evidence provided to support the findings?                                                                                                                                                                                     |
| <b>4</b>                    | Quantitative Studies: When comparing / analysing the groups (if more than one), did the authors consider the <ul style="list-style-type: none"> <li>- Comparability</li> <li>- Confounding variables</li> </ul> and controlling for these? |
| <b>5</b>                    | Qualitative Studies: Did the researchers consider their own position, assumptions and possible biases?                                                                                                                                     |
| <b>6</b>                    | Were the strengths and limitations stated?                                                                                                                                                                                                 |
| <b>7</b>                    | Was ethical committee approval obtained?                                                                                                                                                                                                   |
| <b>8</b>                    | How valuable is this research to the review? High, Medium or Low                                                                                                                                                                           |

\*Items 1,2,3,5,7,8 from CASP qualitative checklist (CASP 2018a). Items 5, 1 and 7 also from Long (2005). Item 4 from CASP Cohort Study Checklist (CASP 2018b)

**REFERENCES**

Long A (2005). Evaluative tool for mixed method studies. University of Leeds, School of Healthcare[online]. 24:2017.

Critical Appraisal Skills Programme (2018). CASP (Qualitative) Checklist. [online] Available at: [https://casp-uk.net/images/checklist/documents/CASP-Qualitative-Studies-Checklist/CASP-Qualitative-Checklist-2018\\_fillable\\_form.pdf](https://casp-uk.net/images/checklist/documents/CASP-Qualitative-Studies-Checklist/CASP-Qualitative-Checklist-2018_fillable_form.pdf). Date Accessed: 17/2/20

Critical Appraisal Skills Programme (2018). CASP (Cohort Study) Checklist. [online] Available at: [https://casp-uk.net/images/checklist/documents/CASP-Cohort-Study-Checklist/CASP-Cohort-Study-Checklist-2018\\_fillable\\_form.pdf](https://casp-uk.net/images/checklist/documents/CASP-Cohort-Study-Checklist/CASP-Cohort-Study-Checklist-2018_fillable_form.pdf). Accessed: Date Accessed: 17/2/20

| Quality Assessment Criteria |                                                                                                                                                                                       | de Souza[45] | Kessler and Staudinger[37] | Hernandez and Gonzalez[46] | Wilson, Cordier[47] | Biggs and Knox[48] | Knight, Skouteris[35] | Ostensen, Gjevjon[15] | Santini, Tombolesi[49] | Wilson, Cordier[33] |
|-----------------------------|---------------------------------------------------------------------------------------------------------------------------------------------------------------------------------------|--------------|----------------------------|----------------------------|---------------------|--------------------|-----------------------|-----------------------|------------------------|---------------------|
| 1                           | Is there adequate rationale for using this design to address the research aim/question?                                                                                               | ✓            | ✓                          | ✓                          | ✓                   | ✓                  | ✓                     | ✓                     | ✓                      | ✓                   |
| 2                           | Did the authors justify the sample size used?                                                                                                                                         | UNCLEAR      | ✓                          | ✓                          | ✓                   | ✓                  | ✓                     | ✓                     | ✓                      | ✓                   |
| 3                           | Is adequate evidence provided to support the findings?                                                                                                                                | ✓            | ✓                          | ✓                          | ✓                   | UNCLEAR            | ✓                     | ✓                     | ✓                      | ✓                   |
| 4                           | Quantitative Studies: When comparing / analysing the groups (if more than one), did the authors consider the<br>- Comparability<br>- Confounding variables and controlling for these? | N/A          | ✓                          | ✓                          | N/A                 | ✓                  | N/A                   | N/A                   | N/A                    | ✓                   |
| 5                           | Qualitative Studies: Did the researchers consider their own position, assumptions and possible biases?                                                                                | UNCLEAR      | N/A                        | N/A                        | ✓                   | N/A                | ✓                     | UNCLEAR               | ✓                      | UNCLEAR             |
| 6                           | Were the strengths and limitations stated?                                                                                                                                            | ✓            | ✓                          | ✓                          | ✓                   | ✓                  | ✓                     | ✓                     | ✓                      | ✓                   |
| 7                           | Was ethical committee approval obtained?                                                                                                                                              | UNCLEAR      | UNCLEAR                    | ✓                          | ✓                   | ✓                  | ✓                     | ✓                     | UNCLEAR                | ✓                   |
| 8                           | How valuable is this research to the review? High, Medium or Low                                                                                                                      | HIGH         | HIGH                       | MEDIUM                     | HIGH                | MEDIUM             | HIGH                  | HIGH                  | HIGH                   | HIGH                |
